# Supplementary material for: Palladium-catalyzed (3 + 2) annulations of 1,3-bis-electrophilic motifs: straightforward synthesis of functionalized pyrrolidines
Source: Royal Society of Chemistry journal article supplement (doi:10.1039/d3qo00362k), 2023-01-01
Supplement: d3qo00362k1.pdf [file d3qo00362k1.pdf]

## **Palladium-Catalyzed (3+2) Annulations of 1,3-Bis-Electrophilic motifs: Straightforward Synthesis of Functionalized Pyrrolidines**

Li Jing,<sup>1</sup> Zhongjun Li,<sup>1\*</sup> Er-Qing Li<sup>1\*</sup>

<sup>1</sup> L. Jing, Prof. Z.-J. Li, Prof. E.-Q. Li

<sup>1</sup> Green Catalysis Center and College of Chemistry, Zhengzhou University, Zhengzhou 450001, P. R. China

E-mail: lizhongjun@zzu.edu.cn, lierqing@zzu.edu.cn

---

## Table of Contents

|                                                                   |     |
|-------------------------------------------------------------------|-----|
| <b>Table of Contents</b> .....                                    | S2  |
| 1. General experimental details .....                             | S3  |
| 2. General procedure for the Synthesis of matrerails .....        | S3  |
| 3. General procedure for the reaction .....                       | S10 |
| 5. Copies of <sup>1</sup> H NMR, <sup>13</sup> C NMR spectra..... | S26 |
| 6. Copies of HPLC Chromatograms .....                             | S69 |
| 7. X-Ray single crystal data of product 3aa.....                  | S71 |

## 1. General experimental details

All reactions were performed under nitrogen using solvents dried by standard methods. NMR spectra were obtained using Bruker AV300/400 spectrometer. Chemical shifts are expressed in parts per million (ppm) downfield from internal TMS. HRMS spectra were obtained on an Agilent 1290-6540 UHPLC Q-ToF HR-MS spectrometer. X-ray crystallographic analyses were performed on an Oxford diffraction Gemini E diffractometer. Melting Point: heating rate: 4 °C/min, the thermometer was not corrected. Enantiomer excesses were determined by chiral HPLC analysis on Chiralcel IA/IG/IB N-5 in comparison with the authentic racemates. Chiral HPLC analysis recorded on Shanghaiyice instruments and Equipment Co. Ltd. and Shimadzu LC-20A. Silica gel (200-300 mesh) was used for the chromatographic separations. All commercially available reagents were used without further purification.

## 2. General procedure for the Synthesis of matrerails

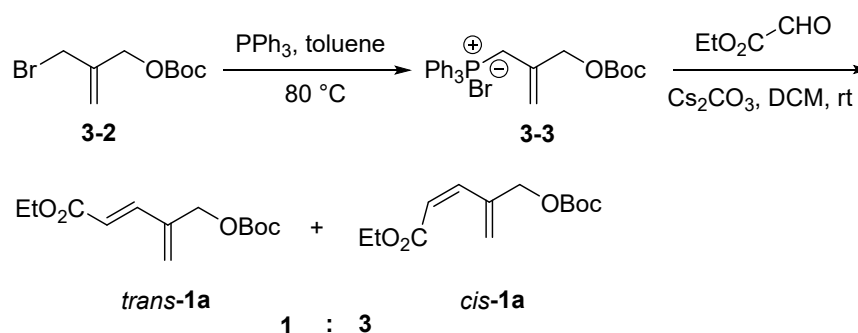

Triphenyl phosphorus (55 mol) and 2-(bromomethyl) allyl *tert*-butyl carbonate (50 mol) was added to a 250 mL round bottom flask, toluene (100 mL) was added and the mixture was stirred at 80 °C until triphenyl phosphorus dissolved. The mixture was refluxed at 80 °C for 48 h. The reaction solution is filtered to obtain white solid, and washed with petroleum ether to obtain crude product.

Dissolve the white solid (10 mmol) obtained in 50 mL DCM, add ethyl 2-oxoacetate (11 mmol) and Cesium carbonate (20 mmol) to the above system, and react at room temperature for two days. Remove the salt from the reaction solution through suction filtration to obtain the filtrate, remove the solvent from the filtrate through rotary evaporator, and separate the crude product through silica gel column chromatography to obtain *cis*-**1a** (petroleum ether: ethyl acetate=50:1).

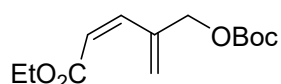

**Ethyl-(Z)-4-(((*tert*-butoxycarbonyl)oxy)methyl)penta-2,4-dienoate **1a****

Yellow liquid.  $^1\text{H NMR}$  (300 MHz,  $\text{CDCl}_3$ )  $\delta$  6.44 (d,  $J = 12.6$  Hz, 1H), 5.82 (d,  $J = 12.6$  Hz, 1H), 5.50 (s, 1H), 5.43 (s, 1H), 4.79 (s, 2H), 4.15 (q,  $J = 7.1$  Hz, 2H), 1.46 (s, 9H), 1.27 (t,  $J = 7.1$  Hz, 3H)ppm.  $^{13}\text{C NMR}$  (75 MHz,  $\text{CDCl}_3$ )  $\delta$  165.8, 153.2, 140.1, 139.6, 121.6, 121.1, 82.1, 67.8, 60.4, 27.7, 14.1ppm. **HRMS** (ESI)  $m/z$ :  $[\text{M}+\text{Na}]^+$  calcd for  $\text{C}_{13}\text{H}_{20}\text{NaO}_5^+$ : 279.1203; Found: 279.1205.

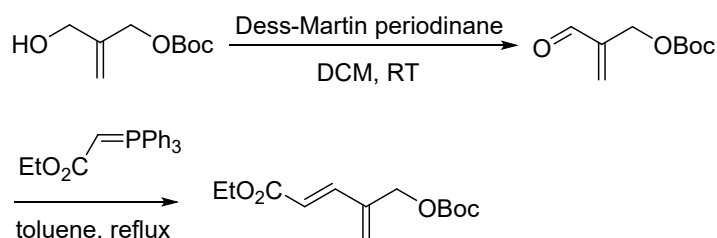

*tert*-Butyl (2 - (hydroxymethyl) allyl) (50 mmol) carbonate is added to a 250 mL round bottom flask, and then 120 mL dichloromethane is added, and stirred; The temperature of the reaction solution was reduced to 0 °C, Dais-Martin oxidant (55 mmol) was slowly added to the above system in batches, and the reaction was monitored after half an hour. Remove the solvent through the rotary evaporator, add ethyl acetate to dissolve the product, extract and filter the filtrate, remove the solvent through the rotary evaporator, and separate the oxide by silica gel column chromatography to obtain oxide (petroleum ether: ethyl acetate=10:1).

Oxide (10 mmol) is added to a 100mL round bottom flask, and then 30mL of toluene is added to dissolve it. Wittig reagent (12 mmol) is added, and then the

reaction solution is heated and refluxed for half an hour. The solvent was removed by rotary evaporation apparatus, and **trans-1a** (petroleum ether: ethyl acetate=30:1) was obtained by trans-silica column chromatography.

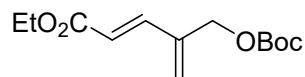

**Ethyl (E)-4-(((tert-butoxycarbonyl)oxy)methyl)penta-2,4-dienoate 1a**

Yellow liquid.  $^1\text{H NMR}$  (300 MHz,  $\text{CDCl}_3$ )  $\delta$  7.28 (d,  $J = 16.2$  Hz, 1H), 5.93 (d,  $J = 16.2$  Hz, 1H), 5.60 (s, 1H), 5.56 (s, 1H), 4.72 (s, 1H), 4.19 (q,  $J = 7.1$  Hz, 2H), 1.46 (s, 9H), 1.27 (t,  $J = 7.1$  Hz, 3H) ppm.  $^{13}\text{C NMR}$  (75 MHz,  $\text{CDCl}_3$ )  $\delta$  166.6, 153.1, 143.0, 138.8, 125.3, 119.4, 82.5, 65.4, 60.5, 27.7, 14.2 ppm. HRMS (ESI)  $m/z$ :  $[\text{M}+\text{Na}]^+$  calcd for  $\text{C}_{13}\text{H}_{20}\text{NaO}_5^+$ : 279.1203; Found: 279.1205.

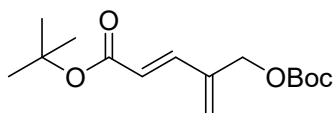

**tert-Butyl (E)-4-(((tert-butoxycarbonyl)oxy)methyl)penta-2,4-dienoate 1b**

Yellow oil.  $^1\text{H NMR}$  (300 MHz,  $\text{CDCl}_3$ )  $\delta$  7.21 (d,  $J = 16.2$  Hz, 1H), 5.89 (d,  $J = 16.2$  Hz, 1H), 5.60 (s, 1H), 5.56 (s, 1H), 4.73 (s, 2H), 1.50 (s, 18H) ppm.  $^{13}\text{C NMR}$  (75 MHz,  $\text{CDCl}_3$ )  $\delta$  165.9, 153.2, 142.0, 138.9, 124.7, 121.3, 82.6, 80.6, 65.6, 28.1, 27.7 ppm. HRMS (ESI)  $m/z$ :  $[\text{M}+\text{Na}]^+$  calcd for  $\text{C}_{15}\text{H}_{24}\text{NaO}_5^+$ : 307.1516; Found: 307.1520.

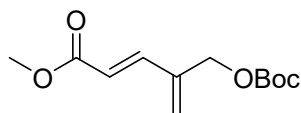

**Methyl (E)-4-(((tert-butoxycarbonyl)oxy)methyl)penta-2,4-dienoate 1c**

Yellow oil.  $^1\text{H NMR}$  (300 MHz,  $\text{CDCl}_3$ )  $\delta$  7.32 (d,  $J = 16.2$  Hz, 1H), 5.97 (d,  $J = 16.2$  Hz, 1H), 5.64 (s, 1H), 5.60 (s, 1H), 4.74 (s, 2H), 3.76 (s, 3H), 1.49 (s, 9H) ppm.  $^{13}\text{C NMR}$  (75 MHz,  $\text{CDCl}_3$ )  $\delta$  167.1, 153.1, 143.3, 138.8, 125.5, 119.0, 82.6, 65.5, 51.7, 27.7 ppm. HRMS (ESI)  $m/z$ :  $[\text{M}+\text{Na}]^+$  calcd for  $\text{C}_{12}\text{H}_{18}\text{NaO}_5^+$ : 265.1046; Found: 265.1053.

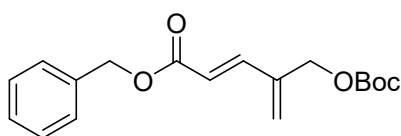

**Benzyl (*E*)-4-(((*tert*-butoxycarbonyl)oxy)methyl)penta-2,4-dienoate 1d**

Yellow oil.  $^1\text{H NMR}$  (300 MHz,  $\text{CDCl}_3$ )  $\delta$  7.42 - 7.33 (m, 6H), 6.03 (d,  $J = 16.2$  Hz, 1H), 5.66 (s, 1H), 5.61 (s, 1H), 5.22 (s, 2H), 4.75 (s, 2H), 1.50 (s, 9H) ppm.  $^{13}\text{C NMR}$  (75 MHz,  $\text{CDCl}_3$ )  $\delta$  166.4, 153.1, 143.6, 138.9, 135.9, 128.6, 128.3, 125.7, 119.1, 82.6, 66.4, 65.5, 27.7 ppm. **HRMS** (ESI)  $m/z$ :  $[\text{M}+\text{Na}]^+$  calcd for  $\text{C}_{18}\text{H}_{22}\text{NaO}_5^+$ : 341.1359; Found: 341.1370.

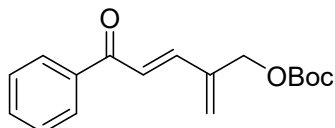

**(*E*)-*Tert*-Butyl (2-methylene-5-oxo-5-phenylpent-3-en-1-yl) carbonate 1e**

White solid. **MP**: 46.0 - 48.0 °C.  $^1\text{H NMR}$  (400 MHz,  $\text{CDCl}_3$ )  $\delta$  8.00 - 7.95 (m, 2H), 7.61 - 7.56 (m, 1H), 7.52 - 7.43 (m, 3H), 7.09 (d,  $J = 15.9$  Hz, 1H), 5.75 (s, 1H), 5.73 (s, 1H), 4.90 (s, 2H), 1.52 (s, 9H) ppm.  $^{13}\text{C NMR}$  (101 MHz,  $\text{CDCl}_3$ )  $\delta$  190.2, 153.3, 143.0, 139.4, 137.8, 133.0, 128.6, 126.8, 122.8, 82.7, 65.6, 27.8 ppm. **HRMS** (ESI)  $m/z$ :  $[\text{M}+\text{Na}]^+$  calcd for  $\text{C}_{17}\text{H}_{20}\text{NaO}_4^+$ : 311.1254; Found: 311.1268.

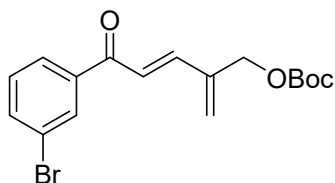

**(*E*)-5-(4-Bromophenyl)-2-methylene-5-oxopent-3-en-1-yl *tert*-butyl carbonate 1f**

Yellow oil.  $^1\text{H NMR}$  (400 MHz,  $\text{CDCl}_3$ )  $\delta$  8.09 (t,  $J = 1.7$  Hz, 1H), 7.92 - 7.85 (m, 1H), 7.73 - 7.67 (m, 1H), 7.46 (d,  $J = 15.8$  Hz, 1H), 7.41 - 7.34 (m, 1H), 7.02 (d,  $J = 15.8$  Hz, 1H), 5.79 (s, 1H), 5.75 (s, 1H), 4.89 (s, 2H), 1.52 (s, 9H) ppm.  $^{13}\text{C NMR}$  (101 MHz,  $\text{CDCl}_3$ )  $\delta$  188.8, 153.3, 143.8, 139.6, 139.3, 135.8, 131.5, 130.2, 127.6, 127.0, 123.0, 122.2, 82.8, 65.6, 27.8 ppm. **HRMS** (ESI)  $m/z$ :  $[\text{M}+\text{Na}]^+$  calcd for  $\text{C}_{17}\text{H}_{19}\text{BrNaO}_4^+$ : 389.0359; Found: 389.0363.

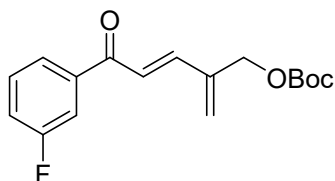

**(*E*)-*tert*-Butyl (5-(3-fluorophenyl)-2-methylene-5-oxopent-3-en-1-yl) carbonate 1g**

Yellow oil. **<sup>1</sup>H NMR (400 MHz, CDCl<sub>3</sub>)** δ 7.75 (d, *J* = 7.8 Hz, 1H), 7.69- 7.63 (m, 1H), 7.53 - 7.42 (m 2H), 7.34 - 7.24 (m, 1H), 7.04 (d, *J* = 15.9 Hz, 1H), 5.78 (s, 1H), 5.75 (s, 1H), 4.89 (s, 2H), 1.52 (s, 9H) ppm. **<sup>13</sup>C NMR (101 MHz, CDCl<sub>3</sub>)** δ 188.9, 162.9 (d, *J* = 248.2 Hz), 153.3, 143.7, 139.9, 139.3, 130.3 (d, *J* = 7.6 Hz), 127.5, 124.2 (d, *J* = 3.0 Hz), 122.3, 120.0 (d, *J* = 21.4 Hz), 115.3 (d, *J* = 22.6 Hz), 82.8, 65.6, 27.8 ppm. **HRMS (ESI) m/z:** [M+Na]<sup>+</sup> calcd for C<sub>17</sub>H<sub>19</sub>FNaO<sub>4</sub><sup>+</sup>: 329.1160; Found: 329.1165

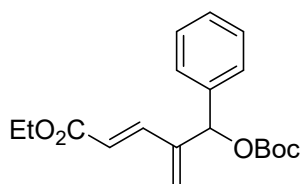

**Ethyl-(*E*)-4-(((*tert*-butoxycarbonyl)oxy)(phenyl)methyl)penta-2,4-dienoate 1h**

Yellow oil. **<sup>1</sup>H NMR (300 MHz, CDCl<sub>3</sub>)** δ 7.51 - 7.19 (m, 6H), 6.31 (s, 1H), 5.90 (d, *J* = 16.2 Hz, 1H), 5.72 (s, 1H), 5.70 (s, 1H), 4.31 - 4.06 (m, 2H), 1.48 (s, 9H), 1.26 (t, *J* = 7.1 Hz, 3H) ppm. **<sup>13</sup>C NMR (75 MHz, CDCl<sub>3</sub>)** δ 166.6, 152.6, 142.8, 142.7, 137.1, 128.7, 128.6, 127.6, 123.6, 120.2, 82.8, 77.0, 60.5, 27.8, 14.2 ppm. **HRMS (ESI) m/z:** [M+Na]<sup>+</sup> calcd for C<sub>19</sub>H<sub>24</sub>NaO<sub>5</sub><sup>+</sup>: 355.1516; Found: 355.1531

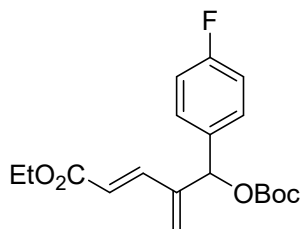

**Ethyl-(*E*)-4-(((*tert*-butoxycarbonyl)oxy)(4-fluorophenyl)methyl)penta-2,4-dienoate 1i**

Light yellow solid. **MP:** 60.0 - 62.0 °C. **<sup>1</sup>H NMR (300 MHz, CDCl<sub>3</sub>)** δ 7.41 - 7.33 (m, 2H), 7.27 (d, *J* = 16.3 Hz, 1H), 7.05 (dd, *J* = 12.0, 5.3 Hz, 2H), 6.28 (s, 1H), 5.84 (d, *J* = 16.3 Hz, 1H), 5.72 (s, 1H), 5.70 (s, 1H), 4.29 - 4.08 (m, 2H), 1.47 (s, 9H), 1.26 (t, *J* = 7.1 Hz, 3H) ppm. **<sup>13</sup>C NMR (75 MHz, CDCl<sub>3</sub>)** δ 166.5, 162.8 (d, *J* = 247.7 Hz), 152.5, 142.6, 142.4, 133.0, 129.5 (d, *J* = 8.3 Hz), 123.5, 120.3, 115.7 (d, *J* = 21.6 Hz), 82.9, 76.2, 60.6, 27.7, 14.2 ppm. **HRMS (ESI) m/z:** [M+Na]<sup>+</sup> calcd for C<sub>19</sub>H<sub>23</sub>FNaO<sub>5</sub><sup>+</sup>: 373.1422; Found: 373.1420

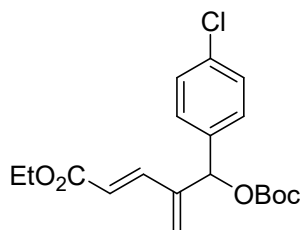

**Ethyl(*E*)-4-(((*tert*-butoxycarbonyl)oxy)(4-chlorophenyl)methyl)penta-2,4-dienoate 1j**

Yellow oil.  $^1\text{H NMR}$  (300 MHz,  $\text{CDCl}_3$ )  $\delta$  7.33 (s, 4H), 7.27 (d,  $J = 16.3$  Hz, 1H), 6.27 (s, 1H), 5.86 (d,  $J = 16.3$  Hz, 1H), 5.71 (d,  $J = 2.4$  Hz, 2H), 4.22 - 4.09 (m, 2H), 1.47 (s, 9H), 1.26 (t,  $J = 7.1$  Hz, 3H) ppm.  $^{13}\text{C NMR}$  (75 MHz,  $\text{CDCl}_3$ )  $\delta$  166.4, 152.5, 142.4, 142.3, 135.8, 134.6, 129.0, 128.9, 123.8, 120.3, 83.0 (s), 76.2, 60.6, 27.7, 14.2 ppm. **HRMS** (ESI)  $m/z$ :  $[\text{M}+\text{Na}]^+$  calcd for  $\text{C}_{19}\text{H}_{23}\text{ClNaO}_5^+$ : 389.1126; Found: 389.1133.

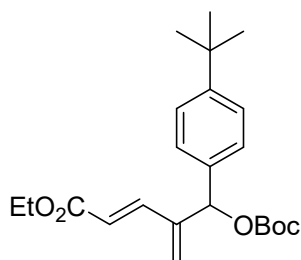

**Ethyl(*E*)-4-(((*tert*-butoxycarbonyl)oxy)(4-(*tert*-butyl)phenyl)methyl)penta-2,4-dienoate 1k**

Yellow oil.  $^1\text{H NMR}$  (300 MHz,  $\text{CDCl}_3$ )  $\delta$  7.34 - 7.27 (m, 2H), 7.23 (d,  $J = 14.6$  Hz, 1H), 7.16 (d,  $J = 8.0$  Hz, 2H), 6.28 (s, 1H), 5.89 (d,  $J = 16.2$  Hz, 1H), 5.72 (s, 1H), 5.68 (s, 1H), 4.21 - 4.12 (m, 2H), 2.34 (s, 3H), 1.48 (s, 9H), 1.26 (t,  $J = 7.1$  Hz, 3H) ppm.  $^{13}\text{C NMR}$  (75 MHz,  $\text{CDCl}_3$ )  $\delta$  166.6, 152.7, 151.6, 142.9, 142.9, 134.0, 127.3, 125.6, 123.2, 120.1, 82.6, 76.8, 60.5, 34.6, 31.3, 27.8, 14.2 ppm. **HRMS** (ESI)  $m/z$ :  $[\text{M}+\text{Na}]^+$  calcd for  $\text{C}_{23}\text{H}_{32}\text{NaO}_5^+$ : 411.2142; Found: 411.2150.



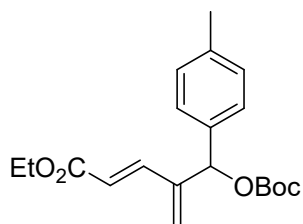

**Ethyl-(*E*)-4-(((*tert*-butoxycarbonyl)oxy)(*p*-tolyl)methyl)penta-2,4-dienoate 1l**

Yellow oil.  $^1\text{H NMR}$  (300 MHz,  $\text{CDCl}_3$ )  $\delta$  7.35 - 7.14 (m, 5H), 6.28 (s, 1H), 5.89 (d,  $J = 16.2$  Hz, 1H), 5.72 (s, 1H), 5.68 (s, 1H), 4.21 - 4.12 (m, 2H), 2.34 (s, 3H), 1.48 (s, 9H), 1.26 (t,  $J = 7.1$  Hz, 3H) ppm.  $^{13}\text{C NMR}$  (75 MHz,  $\text{CDCl}_3$ )  $\delta$  166.6, 152.7, 142.9, 142.8, 138.5, 134.2, 129.4, 127.6, 123.3, 120.1, 82.6, 76.8, 60.5, 27.8, 21.2, 14.2 ppm. **HRMS** (ESI)  $m/z$ :  $[\text{M}+\text{Na}]^+$  calcd for  $\text{C}_{20}\text{H}_{26}\text{NaO}_5^+$ : 369.1672; Found: 369.1683.

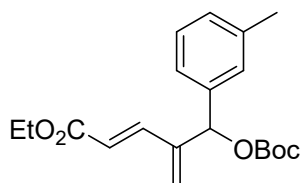

**Ethyl-(*E*)-4-(((*tert*-butoxycarbonyl)oxy)(*m*-tolyl)methyl)penta-2,4-dienoate 1m**

Yellow oil.  $^1\text{H NMR}$  (300 MHz,  $\text{CDCl}_3$ )  $\delta$  7.38 - 7.09 (m, 5H), 6.28 (s, 1H), 5.90 (d,  $J = 16.2$  Hz, 1H), 5.72 (s, 1H), 5.69 (s, 1H), 4.24 - 4.12 (m, 2H), 2.35 (s, 3H), 1.48 (s, 9H), 1.27 (t,  $J = 7.1$  Hz, 3H) ppm.  $^{13}\text{C NMR}$  (75 MHz,  $\text{CDCl}_3$ )  $\delta$  166.6, 152.6, 142.9, 142.7, 138.4, 137.0, 129.5, 128.5, 128.2, 124.7, 123.4, 120.1, 82.7, 77.0, 60.5, 27.8, 21.4, 14.2 ppm. **HRMS** (ESI)  $m/z$ :  $[\text{M}+\text{Na}]^+$  calcd for  $\text{C}_{20}\text{H}_{26}\text{NaO}_5^+$ : 369.1672; Found: 369.1685

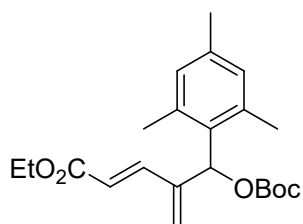

**Ethyl-(*E*)-4-(((*tert*-butoxycarbonyl)oxy)(mesityl)methyl)penta-2,4-dienoate 1n**

Yellow oil.  $^1\text{H NMR}$  (300 MHz,  $\text{CDCl}_3$ )  $\delta$  7.34 (d,  $J = 16.2$  Hz, 1H), 6.85 (s, 2H), 6.71 (s, 1H), 5.99 (d,  $J = 16.1$  Hz, 1H), 5.61 (s, 1H), 5.17 (s, 1H), 4.21 (q,  $J = 7.1$  Hz, 2H), 2.34 (s, 6H), 2.27 (s, 3H), 1.46 (s, 9H), 1.29 (t,  $J = 7.1$  Hz, 3H) ppm.  $^{13}\text{C NMR}$  (75 MHz,  $\text{CDCl}_3$ )  $\delta$  166.7, 153.1, 143.3, 141.5, 137.8, 137.3, 130.5, 123.0, 123.9,

119.8, 82.4, 74.0, 60.4, 27.8, 20.9, 20.7, 14.3 ppm. **HRMS** (ESI)  $m/z$ :  $[M+Na]^+$  calcd for  $C_{22}H_{30}NaO_5^+$ : 397.1985; Found: 397.1998.

### 3. General procedure for the reaction

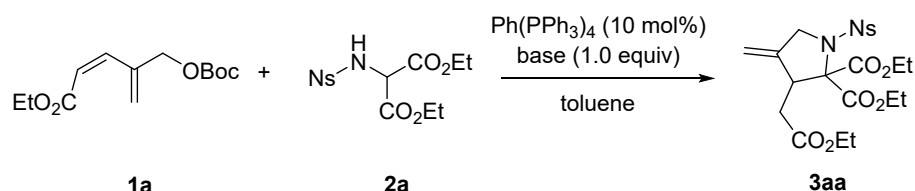

Table S1 Screening base

| Entry | Base                            | Yields (%) <sup>b</sup> |
|-------|---------------------------------|-------------------------|
| 1     | Cs <sub>2</sub> CO <sub>3</sub> | trace                   |
| 2     | K <sub>2</sub> CO <sub>3</sub>  | trace                   |
| 3     | Na <sub>2</sub> CO <sub>3</sub> | trace                   |
| 4     | K <sub>3</sub> PO <sub>4</sub>  | trace                   |
| 5     | DBU                             | 41                      |
| 6     | DMAP                            | 26                      |
| 7     | DABCO                           | 38                      |

<sup>a</sup> Reaction conditions: **1a** (0.13 mmol), **2a** (0.1 mmol), Boc = *tert*-butoxycarbonyl, solvent (1 mL). <sup>b</sup> Separation yield

#### General Procedure for (3+2) cycloaddition reaction.

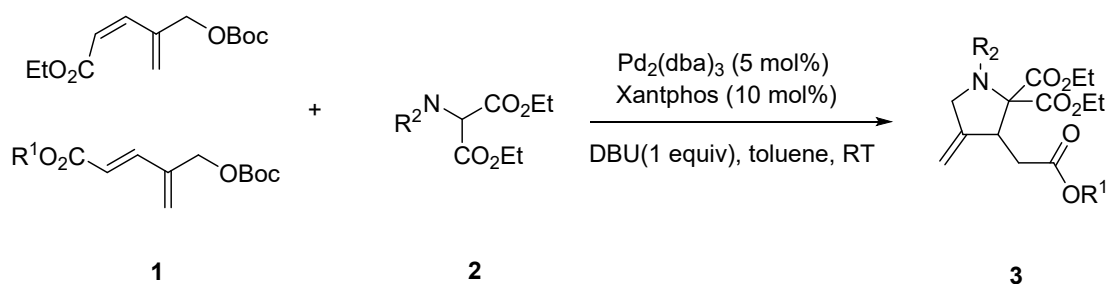

Xantphos (0.01 mmol) and Pd<sub>2</sub>(dba)<sub>3</sub> (0.005 mmol) were dissolved in toluene (1.0 mL) in a 10 mL Schlenk tube under N<sub>2</sub>. After stirring at room temperature for 0.5 h, material **1** (0.13 mmol), material **2** (0.1 mmol), DBU (0.1 mmol) were added. The reaction mixture was stirred at r.t. until the material **2** was totally consumed (monitored by TLC), and then was purified by flash column chromatography directly to afford the corresponding product **3aa - 3al**, **3bg - 3gg**.

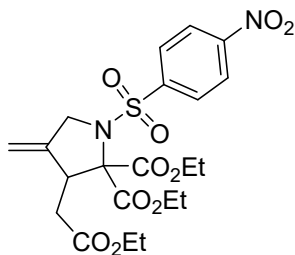

**Diethyl-3-(2-ethoxy-2-oxoethyl)-4-methylene-1-((4-nitrophenyl)sulfonyl)pyrrolidine-2,2-dicarboxylate 3aa**

Light yellow solid (*cis-1a* 35.8 mg, 72% yield; *trans-1a* 37.4 mg, 75% yield). **MP:** 93.0 - 94.0 °C. **<sup>1</sup>H NMR (300 MHz, CDCl<sub>3</sub>)** δ 8.36 (d, *J* = 8.8 Hz, 2H), 8.18 (d, *J* = 8.8 Hz, 2H), 5.04 (d, *J* = 1.4 Hz, 1H), 4.97 (d, *J* = 1.6 Hz, 1H), 4.40 - 4.02 (m, 8H), 3.83 (s, 1H), 2.80 (dd, *J* = 16.9, 5.7 Hz, 1H), 2.47 (dd, *J* = 16.9, 8.1 Hz, 1H), 1.36 - 1.23 (m, 9H) ppm. **<sup>13</sup>C NMR (75 MHz, CDCl<sub>3</sub>)** δ 170.9, 167.3, 166.4, 150.0, 145.7, 142.5, 129.1, 123.9, 109.0, 77.0, 63.0, 62.8, 61.0, 51.4, 49.4, 33.9, 14.1, 13.9 ppm. **HRMS (ESI) m/z:** [M+Na]<sup>+</sup> calcd for C<sub>21</sub>H<sub>26</sub>N<sub>2</sub>NaO<sub>10</sub>S<sup>+</sup>: 521.1200; Found: 521.1199.

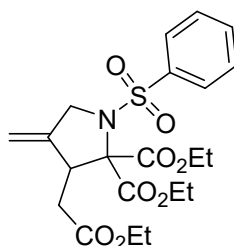

**Diethyl-3-(2-ethoxy-2-oxoethyl)-4-methylene-1-(phenylsulfonyl)pyrrolidine-2,2-dicarboxylate 3ab**

Yellow oil (*cis-1a* 27.4 mg, 60% yield; *trans-1a* 32.5 mg, 72% yield). **<sup>1</sup>H NMR (300 MHz, CDCl<sub>3</sub>)** δ 8.00 (d, *J* = 7.3 Hz, 2H), 7.63 - 7.47 (m, 3H), 4.99 (s, 1H), 4.93 (d, *J* = 1.5 Hz, 1H), 4.39 - 3.98 (m, 8H), 3.85 (s, 1H), 2.80 (dd, *J* = 16.9, 5.5 Hz, 1H), 2.47 (dd, *J* = 16.9, 8.3 Hz, 1H), 1.35 - 1.23 (m, 9H) ppm. **<sup>13</sup>C NMR (75 MHz, CDCl<sub>3</sub>)** δ 171.0, 167.4, 166.5, 143.2, 140.0, 132.7, 128.7, 127.8, 108.3, 76.46, 62.7, 62.4, 60.9, 51.2, 49.5, 33.9, 14.1, 13.9 ppm. **HRMS (ESI) m/z:** [M+Na]<sup>+</sup> calcd for C<sub>21</sub>H<sub>27</sub>NNaO<sub>8</sub>S<sup>+</sup>: 476.1350; Found: 476.1351.

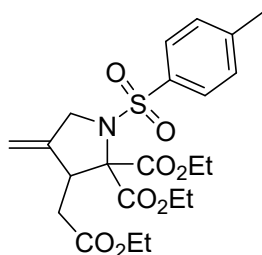

**Diethyl 3-(2-ethoxy-2-oxoethyl)-4-methylene-1-tosylpyrrolidine-2,2-dicarboxylate**  
**3ac**

Yellow oil (*cis*-**1a** 25.2 mg, 54% yield; *trans*-**1a** 29.6 mg, 64% yield).  $^1\text{H NMR}$  (300 MHz,  $\text{CDCl}_3$ )  $\delta$  7.87 (d,  $J = 8.1$  Hz, 2H), 7.30 (d,  $J = 8.1$  Hz, 2H), 4.98 (s, 1H), 4.92 (d,  $J = 1.2$  Hz, 1H), 4.40 - 4.10 (m, 6H), 4.09 - 3.96 (m, 2H), 3.84 (s, 1H), 2.80 (dd,  $J = 16.8, 5.5$  Hz, 1H), 2.53 - 2.37 (m, 4H), 1.36 - 1.21 (m, 9H) ppm.  $^{13}\text{C NMR}$  (75 MHz,  $\text{CDCl}_3$ )  $\delta$  171.1, 167.5, 166.6, 143.5, 143.3, 137.1, 129.3, 127.9, 108.2, 76.4, 62.7, 62.4, 60.9, 51.1, 49.5, 33.9, 21.6, 14.1, 13.9 ppm. HRMS (ESI)  $m/z$ :  $[\text{M}+\text{Na}]^+$  calcd for  $\text{C}_{22}\text{H}_{29}\text{NNaO}_8\text{S}^+$ : 490.1506 ; Found: 490.1509.

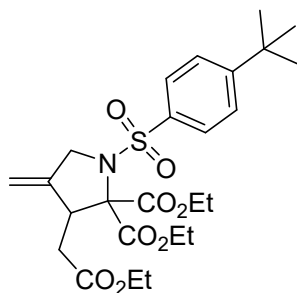

**Diethyl 1-((4-(*tert*-butyl)phenyl)sulfonyl)-3-(2-ethoxy-2-oxoethyl)-4-**  
**methylenepyrrolidine-2,2-dicarboxylate 3ad**

Yellow oil (*cis*-**1a** 33.0 mg, 65% yield; *trans*-**1a** 48.6 mg, 95% yield).  $^1\text{H NMR}$  (300 MHz,  $\text{CDCl}_3$ )  $\delta$  7.91 (d,  $J = 8.5$  Hz, 2H), 7.52 (d,  $J = 8.5$  Hz, 2H), 4.98 (d,  $J = 1.6$  Hz, 1H), 4.92 (d,  $J = 1.8$  Hz, 1H), 4.40 - 3.97 (m, 8H), 3.85 (s, 1H), 2.81 (dd,  $J = 16.9, 5.4$  Hz, 1H), 2.48 (dd,  $J = 16.9, 8.4$  Hz, 1H), 1.34 (s, 9H), 1.32 - 1.22 (m, 9H) ppm.  $^{13}\text{C NMR}$  (75 MHz,  $\text{CDCl}_3$ )  $\delta$  171.1, 167.5, 166.6, 156.4, 143.4, 137.0, 127.7, 125.8, 108.2, 76.4, 62.7, 62.4, 60.9, 51.1, 49.6, 35.1, 33.9, 31.1, 14.1, 13.9 ppm. HRMS (ESI)  $m/z$ :  $[\text{M}+\text{Na}]^+$  calcd for  $\text{C}_{25}\text{H}_{35}\text{NNaO}_8\text{S}^+$ : 532.1976; Found: 532.1985.

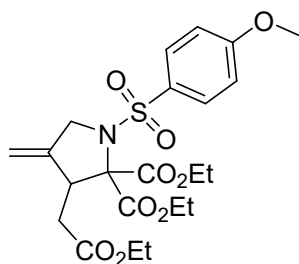

**Diethyl-3-(2-ethoxy-2-oxoethyl)-1-((4-methoxyphenyl)sulfonyl)-4-methylenepyrrolidine-2,2-dicarboxylate 3ae**

Yellow oil (*cis-1a* 38.2 mg, 79% yield; *trans-1a* 45.5 mg, 94% yield).  $^1\text{H NMR}$  (300 MHz,  $\text{CDCl}_3$ )  $\delta$  7.94 (d,  $J = 8.9$  Hz, 2H), 6.97 (d,  $J = 8.9$  Hz, 2H), 4.97 (d,  $J = 1.7$  Hz, 1H), 4.92 (d,  $J = 1.9$  Hz, 1H), 4.36 - 4.09 (m, 6H), 4.06 - 3.93 (m, 2H), 3.88 - 3.80 (m, 4H), 2.79 (dd,  $J = 16.9, 5.6$  Hz, 1H), 2.47 (dd,  $J = 16.9, 8.3$  Hz, 1H), 1.35 - 1.23 (m, 9H) ppm.  $^{13}\text{C NMR}$  (75 MHz,  $\text{CDCl}_3$ )  $\delta$  171.1, 167.61, 166.6, 163.0, 143.4, 131.7, 130.1, 113.9, 108.2, 76.5, 62.7, 62.4, 60.9, 55.6, 50.9, 49.6, 34.0, 14.1, 13.9 ppm. HRMS (ESI)  $m/z$ :  $[\text{M}+\text{Na}]^+$  calcd for  $\text{C}_{22}\text{H}_{29}\text{NNaO}_9\text{S}^+$ : 506.1455 ; Found: 506.1462.

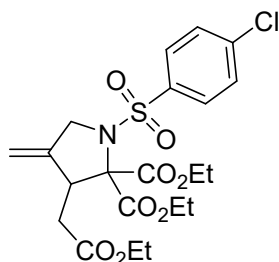

**Diethyl-1-((4-chlorophenyl)sulfonyl)-3-(2-ethoxy-2-oxoethyl)-4-methylenepyrrolidine-2,2-dicarboxylate 3af**

Light yellow solid (*cis-1a* 41.7 mg, 85% yield; *trans-1a* 34.2 mg, 71% yield). MP: 74.0 - 76.0 °C.  $^1\text{H NMR}$  (300 MHz,  $\text{CDCl}_3$ )  $\delta$  7.94 (d,  $J = 8.7$  Hz, 2H), 7.48 (d,  $J = 8.7$  Hz, 2H), 5.00 (d,  $J = 1.7$  Hz, 1H), 4.94 (d,  $J = 1.9$  Hz, 1H), 4.40 - 3.97 (m, 8H), 3.83 (t,  $J = 6.8$  Hz, 1H), 3.00 - 2.66 (m, 1H), 2.54 - 2.39 (m, 1H), 1.35 - 1.23 (m, 9H) ppm.  $^{13}\text{C NMR}$  (75 MHz,  $\text{CDCl}_3$ )  $\delta$  171.0, 167.5, 166.5, 143.0, 139.2, 138.5, 129.4, 129.0, 108.6, 77.5, 77.1, 76.7, 76.6, 62.8, 62.6, 60.9, 51.1, 49.5, 34.0, 14.1, 13.9 ppm. HRMS (ESI)  $m/z$ :  $[\text{M}+\text{Na}]^+$  calcd for  $\text{C}_{21}\text{H}_{26}\text{ClNNaO}_8\text{S}^+$ : 510.0960; Found: 510.0969.

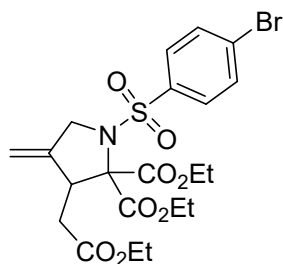

**Diethyl-1-((4-bromophenyl)sulfonyl)-3-(2-ethoxy-2-oxoethyl)-4-methylenepyrrolidine-2,2-dicarboxylate 3ag**

Light yellow solid (*cis-1a* 49.4 mg, 93% yield; *trans-1a* 41.7 mg, 79% yield). **MP:** 86.0 - 88.0 °C. **<sup>1</sup>H NMR (300 MHz, CDCl<sub>3</sub>)** δ 7.87 (d, *J* = 8.5 Hz, 2H), 7.65 (d, *J* = 8.5 Hz, 2H), 5.00 (s, 1H), 4.94 (s, 1H), 4.39 - 3.95 (m, 8H), 3.83 (s, 1H), 2.79 (dd, *J* = 16.9, 5.7 Hz, 1H), 2.46 (dd, *J* = 16.9, 8.1 Hz, 1H), 1.35 - 1.22 (m, 9H) ppm. **<sup>13</sup>C NMR (75 MHz, CDCl<sub>3</sub>)** δ 171.0, 167.5, 166.5, 142.9, 139.0, 132.0, 129.5, 127.8, 108.6, 76.7, 62.8, 62.6, 61.0, 51.1, 49.5, 34.0, 14.2, 13.9 ppm. **HRMS (ESI) m/z:** [M+Na]<sup>+</sup> calcd for C<sub>21</sub>H<sub>26</sub>BrNNaO<sub>8</sub>S<sup>+</sup>: 554.0455 ; Found: 554.0466.

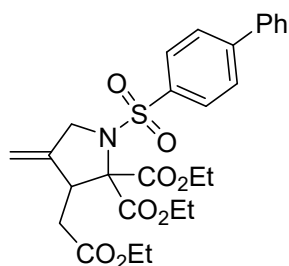

**Diethyl-1-([1,1'-biphenyl]-4-ylsulfonyl)-3-(2-ethoxy-2-oxoethyl)-4-methylenepyrrolidine-2,2-dicarboxylate 3ah**

Yellow oil (*cis-1a* 51.6 mg, 98% yield; *trans-1a* 46.5 mg, 90% yield). **<sup>1</sup>H NMR (300 MHz, CDCl<sub>3</sub>)** δ 8.07 (d, *J* = 8.5 Hz, 2H), 7.72 (d, *J* = 8.5 Hz, 2H), 7.65 - 7.58 (m, 2H), 7.53 - 7.38 (m, 3H), 5.01 (d, *J* = 1.6 Hz, 1H), 4.95 (d, *J* = 1.8 Hz, 1H), 4.42 - 4.03 (m, 8H), 3.88 (s, 1H), 2.83 (dd, *J* = 16.9, 5.6 Hz, 1H), 2.50 (dd, *J* = 16.9, 8.3 Hz, 1H), 1.37 - 1.23 (m, 9H) ppm. **<sup>13</sup>C NMR (75 MHz, CDCl<sub>3</sub>)** δ 171.1, 167.5, 166.6, 145.6, 143.3, 139.5, 138.6, 129.0, 128.4, 127.4, 127.4, 108.4, 76.5, 62.8, 62.5, 60.9, 51.2, 49.6, 33.9, 14.2, 14.0 ppm. **HRMS (ESI) m/z:** [M+Na]<sup>+</sup> calcd for C<sub>27</sub>H<sub>31</sub>BrNNaO<sub>8</sub>S<sup>+</sup>: 552.1663 ; Found: 552.1669.

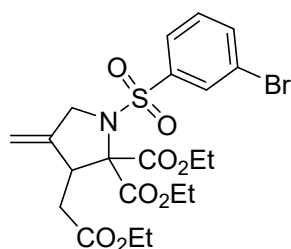

**Diethyl-1-((3-bromophenyl)sulfonyl)-3-(2-ethoxy-2-oxoethyl)-4-methylenepyrrolidine-2,2-dicarboxylate 3ai**

Yellow oil (*cis-1a* 29.7 mg, 51% yield; *trans-1a* 31.8 mg, 60% yield).  $^1\text{H NMR}$  (300 MHz,  $\text{CDCl}_3$ )  $\delta$  8.13 (t,  $J = 1.7$  Hz, 1H), 7.94 (d,  $J = 7.9$  Hz, 1H), 7.75 - 7.67 (m, 1H), 7.40 (t,  $J = 8.0$  Hz, 1H), 5.02 (d,  $J = 1.7$  Hz, 1H), 4.95 (d,  $J = 1.9$  Hz, 1H), 4.40 - 4.00 (m, 8H), 3.85 (t,  $J = 6.8$  Hz, 1H), 2.80 (dd,  $J = 16.9, 5.5$  Hz, 1H), 2.48 (dd,  $J = 16.9, 8.3$  Hz, 1H), 1.36 - 1.23 (m, 9H) ppm.  $^{13}\text{C NMR}$  (75 MHz,  $\text{CDCl}_3$ )  $\delta$  171.0, 167.3, 166.4, 142.9, 141.8, 135.8, 130.7, 130.3, 126.4, 122.8, 108.6, 76.6, 62.8, 62.6, 61.0, 51.3, 49.5, 33.8, 14.2, 13.9 ppm. HRMS (ESI)  $m/z$ :  $[\text{M}+\text{Na}]^+$  calcd for  $\text{C}_{21}\text{H}_{26}\text{BrNNaO}_8\text{S}^+$ : 554.0455; Found: 554.0460.

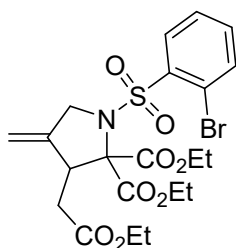

**Diethyl-1-((2-bromophenyl)sulfonyl)-3-(2-ethoxy-2-oxoethyl)-4-methylenepyrrolidine-2,2-dicarboxylate 3aj**

Yellow oil (*cis-1a* 32.8 mg, 62% yield; *trans-1a* 34.0 mg, 64% yield).  $^1\text{H NMR}$  (300 MHz,  $\text{CDCl}_3$ )  $\delta$  8.04 (dd,  $J = 7.9, 1.7$  Hz, 1H), 7.73 (dd,  $J = 7.7, 1.2$  Hz, 1H), 7.47 - 7.33 (m, 2H), 5.08 (d,  $J = 1.9$  Hz, 1H), 4.93 (d,  $J = 2.1$  Hz, 1H), 4.67 - 4.49 (m, 2H), 4.30 - 4.01 (m, 6H), 3.94 - 3.85 (m, 1H), 2.85 (dd,  $J = 16.8, 4.2$  Hz, 1H), 2.46 (dd,  $J = 16.8, 9.0$  Hz, 1H), 1.31 - 1.24 (m, 6H), 1.14 (t,  $J = 7.1$  Hz, 3H) ppm.  $^{13}\text{C NMR}$  (75 MHz,  $\text{CDCl}_3$ )  $\delta$  171.0, 166.7, 166.5, 143.3, 141.2, 135.3, 133.0, 131.0, 127.1, 119.6,

107.6, 76.0, 62.5, 62.4, 61.0, 54.2, 49.2, 33.6, 14.1, 14.0, 13.7 ppm. **HRMS** (ESI)  $m/z$ :  $[M+Na]^+$  calcd for  $C_{21}H_{26}BrNNaO_8S^+$ : 554.0455; Found: 554.0475.

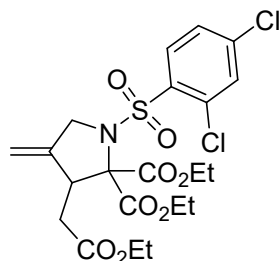

**Diethyl-1-((2,4-dichlorophenyl)sulfonyl)-3-(2-ethoxy-2-oxoethyl)-4-methylenepyrrolidine-2,2-dicarboxylate 3ak**

Yellow oil (*cis-1a* 41.8 mg, 80% yield; *trans-1a* 27.9 mg, 57% yield).  **$^1H$  NMR (300 MHz,  $CDCl_3$ )**  $\delta$  7.95 (d,  $J = 8.6$  Hz, 1H), 7.51 (d,  $J = 2.0$  Hz, 1H), 7.36 (dd,  $J = 8.6, 2.0$  Hz, 1H), 5.08 (d,  $J = 1.8$  Hz, 1H), 4.93 (d,  $J = 2.0$  Hz, 1H), 4.66 - 4.46 (m, 2H), 4.29 - 4.07 (m, 6H), 3.83 (dd,  $J = 6.8, 1.9$  Hz, 1H), 2.85 (dd,  $J = 16.7, 4.1$  Hz, 1H), 2.43 (dd,  $J = 16.7, 9.0$  Hz, 1H), 1.31 - 1.17 (m, 9H) ppm.  **$^{13}C$  NMR (75 MHz,  $CDCl_3$ )**  $\delta$  171.0, 166.7, 143.1, 138.8, 138.3, 132.6, 132.1, 131.4, 126.8, 107.7, 76.3, 62.6, 62.5, 61.0, 54.1, 49.1, 33.6, 14.1, 14.0, 13.8 ppm. **HRMS** (ESI)  $m/z$ :  $[M+Na]^+$  calcd for  $C_{21}H_{25}Cl_2NNaO_8S^+$ : 544.0570; Found: 544.0579.

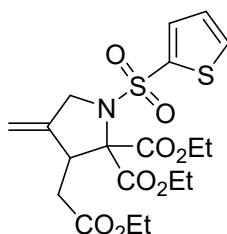

**Diethyl-3-(2-ethoxy-2-oxoethyl)-4-methylene-1-(thiophen-2-ylsulfonyl)pyrrolidine-2,2-dicarboxylate 3al**

Yellow oil (*cis-1a* 19.0 mg, 41% yield; *trans-1a* 34.9 mg, 76% yield).  **$^1H$  NMR (300 MHz,  $CDCl_3$ )**  $\delta$  7.76 (dd,  $J = 3.7, 1.2$  Hz, 1H), 7.61 (dd,  $J = 5.0, 1.2$  Hz, 1H), 7.09 (dd,  $J = 4.9, 3.9$  Hz, 1H), 5.02 (d,  $J = 1.7$  Hz, 1H), 4.96 (d,  $J = 1.9$  Hz, 1H), 4.41 - 4.09 (m, 8H), 3.87 (t,  $J = 6.8$  Hz, 1H), 2.82 (dd,  $J = 16.8, 5.6$  Hz, 1H), 2.49 (dd,  $J = 16.8, 8.3$  Hz, 1H), 1.37 - 1.24 (m, 9H) ppm.  **$^{13}C$  NMR (75 MHz,  $CDCl_3$ )**  $\delta$  171.0, 167.3, 166.3, 142.9, 140.8, 133.4, 132.4, 127.0, 108.6, 76.7, 62.8, 62.5, 60.9, 51.1,



49.6, 33.9, 14.1, 13.9 ppm. **HRMS** (ESI)  $m/z$ :  $[M+Na]^+$  calcd for  $C_{19}H_{25}BrNNaO_8S_2^+$ : 482.0914; Found: 482.0915.

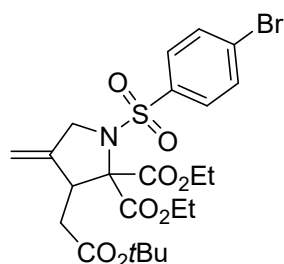

**Diethyl-1-((4-bromophenyl)sulfonyl)-3-(2-(tert-butoxy)-2-oxoethyl)-4-methylenepyrrolidine-2,2-dicarboxylate 3bg**

Yellow oil, 22.9 mg, 41% yield.  $^1H$  NMR (300 MHz,  $CDCl_3$ )  $\delta$  7.88 (d,  $J = 8.6$  Hz, 2H), 7.65 (d,  $J = 8.6$  Hz, 2H), 5.00 (d,  $J = 1.8$  Hz, 1H), 4.95 (d,  $J = 1.9$  Hz, 1H), 4.39 - 4.17 (m, 4H), 4.10 - 3.96 (m, 2H), 3.79 (s, 1H), 2.74 (dd,  $J = 16.8, 5.5$  Hz, 1H), 2.37 (dd,  $J = 16.8, 8.3$  Hz, 1H), 1.45 (s, 9H), 1.35 - 1.28 (m, 6H) ppm.  $^{13}C$  NMR (75 MHz,  $CDCl_3$ )  $\delta$  170.2, 167.5, 166.5, 143.2, 139.1, 132.0, 129.5, 127.7, 108.4, 81.2, 76.7, 62.7, 62.5, 51.2, 49.7, 35.0, 28.0, 13.9 ppm. **HRMS** (ESI)  $m/z$ :  $[M+Na]^+$  calcd for  $C_{23}H_{30}BrNNaO_8S^+$ : 582.0768; Found: 582.0770.

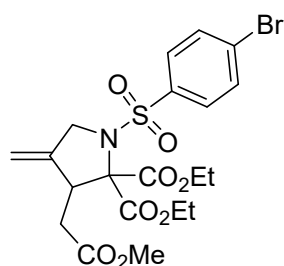

**Diethyl-1-((4-bromophenyl)sulfonyl)-3-(2-methoxy-2-oxoethyl)-4-methylenepyrrolidine-2,2-dicarboxylate 3cg**

Yellow oil, 34.1 mg, 66% yield.  $^1H$  NMR (300 MHz,  $CDCl_3$ )  $\delta$  7.87 (d,  $J = 8.6$  Hz, 2H), 7.65 (d,  $J = 8.6$  Hz, 2H), 5.00 (d,  $J = 1.4$  Hz, 1H), 4.94 (d,  $J = 1.6$  Hz, 1H), 4.39 - 4.18 (m, 4H), 4.09 - 3.96 (m, 2H), 3.84 (t,  $J = 6.8$  Hz, 1H), 3.69 (s, 3H), 2.80 (dd,  $J = 16.9, 6.0$  Hz, 1H), 2.49 (dd,  $J = 16.9, 8.0$  Hz, 1H), 1.31 (q,  $J = 7.1$  Hz, 6H) ppm.  $^{13}C$  NMR (75 MHz,  $CDCl_3$ )  $\delta$  171.4, 167.4, 166.4, 142.9, 139.0, 132.0, 129.5, 127.8,

108.6, 76.7, 62.8, 62.6, 52.0, 51.0, 49.5, 33.8, 13.9 ppm. **HRMS** (ESI)  $m/z$ :  $[M+Na]^+$  calcd for  $C_{20}H_{24}BrNNaO_8S^+$ : 540.0298; Found: 540.0305.

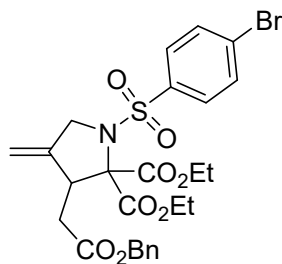

**Diethyl-3-(2-(benzyloxy)-2-oxoethyl)-1-((4-bromophenyl)sulfonyl)-4-methylenepyrrolidine-2,2-dicarboxylate 3dg**

Yellow oil, 48.8 mg, 82% yield.  $^1H$  NMR (300 MHz,  $CDCl_3$ )  $\delta$  7.89 (t,  $J = 9.5$  Hz, 2H), 7.65 (d,  $J = 8.6$  Hz, 2H), 7.36 (s, 5H), 5.11 (d,  $J = 12.2$  Hz, 2H), 4.98 (d,  $J = 1.3$  Hz, 1H), 4.91 (d,  $J = 1.6$  Hz, 1H), 4.39 - 4.14 (m, 4H), 4.10 - 3.96 (m, 2H), 3.87 (t,  $J = 6.7$  Hz, 1H), 2.87 (dd,  $J = 17.0, 5.8$  Hz, 1H), 2.53 (dd,  $J = 17.0, 8.1$  Hz, 1H), 1.34 - 1.25 (m, 6H) ppm.  $^{13}C$  NMR (75 MHz,  $CDCl_3$ )  $\delta$  170.8, 167.4, 166.4, 142.8, 139.1, 135.5, 132.0, 129.5, 128.6, 128.4, 128.4, 127.8, 108.7, 76.7, 66.8, 62.8, 62.6, 51.1, 49.5, 34.0, 13.9 ppm. **HRMS** (ESI)  $m/z$ :  $[M+Na]^+$  calcd for  $C_{26}H_{28}BrNNaO_8S^+$ : 616.0611; Found: 616.0620.

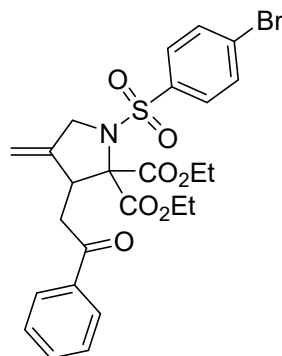

**Diethyl-1-((4-bromophenyl)sulfonyl)-4-methylene-3-(2-oxo-2-phenylethyl)pyrrolidine-2,2-dicarboxylate 3eg**

Yellow oil, 37.1 mg, 66% yield.  $^1H$  NMR (400 MHz,  $CDCl_3$ )  $\delta$  7.99 - 7.94 (m, 2H), 7.91 (d,  $J = 8.6$  Hz, 2H), 7.67 (d,  $J = 8.6$  Hz, 2H), 7.61 (t,  $J = 7.4$  Hz, 1H), 7.50 (t,  $J = 7.6$  Hz, 2H), 5.00 (d,  $J = 1.6$  Hz, 1H), 4.88 (d,  $J = 1.8$  Hz, 1H), 4.40 - 4.19 (m, 4H), 4.19 - 4.03 (m, 3H), 3.57 (dd,  $J = 18.2, 5.9$  Hz, 1H), 3.13 (dd,  $J = 18.2, 6.9$  Hz, 1H), 1.33 - 1.26 (m, 6H) ppm.  $^{13}C$  NMR (101 MHz,  $CDCl_3$ )  $\delta$  196.6, 167.6, 167.0, 143.5,

139.2, 136.4, 133.5, 132.0, 129.5, 128.8, 128.0, 127.8, 108.4, 76.8, 62.8, 62.6, 51.3, 48.7, 38.2, 13.9 ppm. **HRMS** (ESI)  $m/z$ :  $[M+Na]^+$  calcd for  $C_{25}H_{26}BrNNaO_7S^+$ : 586.0506; Found: 586.0512.

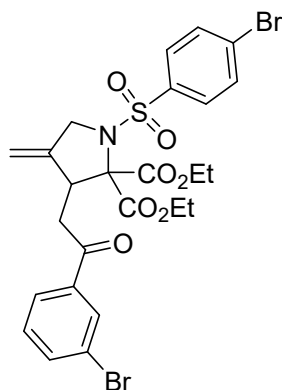

**Diethyl-3-(2-(3-bromophenyl)-2-oxoethyl)-1-((4-bromophenyl)sulfonyl)-4-methylenepyrrolidine-2,2-dicarboxylate 3fg**

Yellow oil, 21.3 mg, 33% yield.  $^1H$  NMR (400 MHz,  $CDCl_3$ )  $\delta$  8.07 (s, 1H), 7.91 (d,  $J = 8.6$  Hz, 2H), 7.87 (d,  $J = 7.9$  Hz, 1H), 7.74 (d,  $J = 8.4$  Hz, 1H), 7.68 (d,  $J = 8.6$  Hz, 2H), 7.38 (t,  $J = 7.9$  Hz, 1H), 5.02 (d,  $J = 1.4$  Hz, 1H), 4.89 (d,  $J = 1.7$  Hz, 1H), 4.42 - 4.19 (m, 4H), 4.16 - 4.02 (m, 3H), 3.55 (dd,  $J = 18.3, 6.4$  Hz, 1H), 3.05 (dd,  $J = 18.3, 6.4$  Hz, 1H), 1.35 - 1.27 (m, 6H) ppm.  $^{13}C$  NMR (101 MHz,  $CDCl_3$ )  $\delta$  195.4, 167.5, 166.9, 143.3, 139.1, 138.1, 136.3, 132.1, 131.1, 130.4, 129.5, 127.8, 126.6, 123.1, 108.6, 76.7, 62.9, 62.7, 51.0, 48.7, 38.4, 14.0, 13.9 ppm. **HRMS** (ESI)  $m/z$ :  $[M+Na]^+$  calcd for  $C_{25}H_{25}Br_2NNaO_7S^+$ : 663.9611; Found: 663.9614.

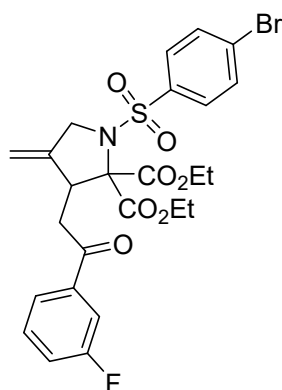

**Diethyl-1-((4-bromophenyl)sulfonyl)-3-(2-(3-fluorophenyl)-2-oxoethyl)-4-methylenepyrrolidine-2,2-dicarboxylate 3gg**

Yellow oil, 25.5 mg, 44% yield.  $^1\text{H NMR}$  (400 MHz,  $\text{CDCl}_3$ )  $\delta$  7.91 (d,  $J = 8.6$  Hz, 2H), 7.74 (d,  $J = 7.8$  Hz, 1H), 7.68 (d,  $J = 8.6$  Hz, 2H), 7.64 (dd,  $J = 9.3, 2.0$  Hz, 1H), 7.52 - 7.45 (m, 1H), 7.35 - 7.29 (m, 1H), 5.02 (d,  $J = 1.6$  Hz, 1H), 4.89 (d,  $J = 1.8$  Hz, 1H), 4.41 - 4.19 (m, 4H), 4.17 - 4.02 (m, 3H), 3.56 (dd,  $J = 18.3, 6.3$  Hz, 1H), 3.08 (dd,  $J = 18.3, 6.5$  Hz, 1H), 1.34 - 1.27 (m, 6H) ppm.  $^{13}\text{C NMR}$  (101 MHz,  $\text{CDCl}_3$ )  $\delta$  195.4, 167.5, 166.9, 162.9 (d,  $J = 248.3$  Hz), 143.3, 139.1, 138.4 (d,  $J = 6.3$  Hz), 132.0, 130.5 (d,  $J = 7.6$  Hz), 129.5, 127.9, 123.8 (d,  $J = 2.8$  Hz), 120.6, 120.4, 114.8 (d,  $J = 22.4$  Hz), 108.5, 76.7, 62.9, 62.7, 51.1, 48.7, 38.5, 13.9 ppm. **HRMS** (ESI)  $m/z$ :  $[\text{M}+\text{Na}]^+$  calcd for  $\text{C}_{25}\text{H}_{25}\text{BrFNNaO}_7\text{S}^+$ : 604.0411; Found: 604.0414.

### General Procedure for (3+2) cycloaddition reaction.

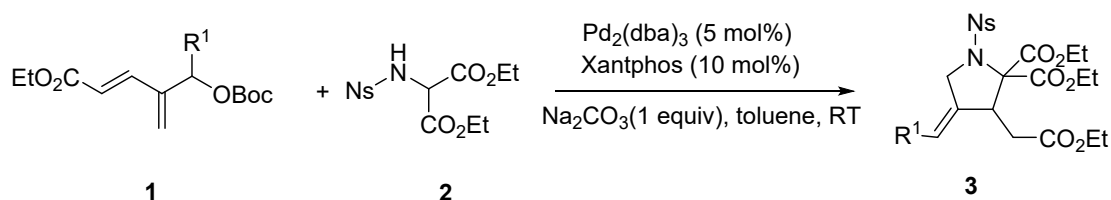

Xantphos (0.01 mmol) and  $\text{Pd}_2(\text{dba})_3$  (0.005 mmol) were dissolved in toluene (1.0 mL) in a 10 mL Schlenk tube under  $\text{N}_2$ . After stirring at room temperature for 0.5 h, material **1** (0.13 mmol), material **2** (0.1 mmol),  $\text{Na}_2\text{CO}_3$  (0.1 mmol) were added. The reaction mixture was stirred at r.t. until the material **2** was totally consumed (monitored by TLC), and then was purified by flash column chromatography directly to afford the corresponding product **3ha-3na**.

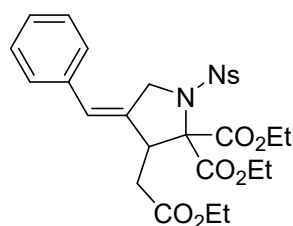

### Diethyl-(Z)-4-benzylidene-3-(2-ethoxy-2-oxoethyl)-1-((4-nitrophenyl)sulfonyl)pyrrolidine-2,2-dicarboxylate **3ha**

Yellow oil, 48.0 mg, 84% yield.  $^1\text{H NMR}$  (400 MHz,  $\text{CDCl}_3$ )  $\delta$  8.45 - 8.36 (m, 2H), 8.31 - 8.24 (m, 2H), 7.37 (t,  $J = 7.4$  Hz, 2H), 7.32 - 7.29 (m, 1H), 7.11 (d,  $J = 7.2$  Hz, 2H), 6.37 (d,  $J = 1.8$  Hz, 1H), 4.41 - 4.13 (m, 8H), 4.08 (t,  $J = 6.5$  Hz, 1H), 2.91 (dd,  $J$

= 16.8, 6.1 Hz, 1H), 2.56 (dd,  $J$  = 16.8, 8.0 Hz, 1H), 1.36 - 1.26 (m, 9H) ppm.  $^{13}\text{C}$  NMR (101 MHz,  $\text{CDCl}_3$ )  $\delta$  170.9, 167.5, 166.3, 145.8, 135.3, 134.5, 129.2, 128.7, 128.3, 127.9, 124.9, 124.1, 76.3, 63.1, 62.9, 61.1, 50.9, 49.6, 35.0, 14.2, 14.0, 13.9 ppm. HRMS (ESI)  $m/z$ :  $[\text{M}+\text{Na}]^+$  calcd for  $\text{C}_{27}\text{H}_{30}\text{N}_2\text{NaO}_{10}\text{S}^+$ : 597.1513; Found: 597.1512.

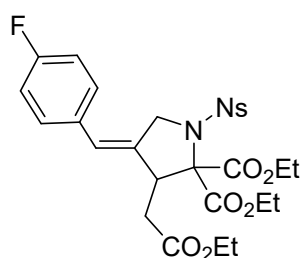

**Diethyl-(Z)-3-(2-ethoxy-2-oxoethyl)-4-(4-fluorobenzylidene)-1-((4-nitrophenyl)sulfonyl)pyrrolidine-2,2-dicarboxylate 3ia**

Yellow oil, 49.6 mg, 84% yield.  $^1\text{H}$  NMR (400 MHz,  $\text{CDCl}_3$ )  $\delta$  8.45 - 8.35 (m, 2H), 8.31 - 8.22 (m, 2H), 7.11 - 7.02 (m, 4H), 6.33 (d,  $J$  = 1.9 Hz, 1H), 4.41 - 4.13 (m, 8H), 4.06 (t,  $J$  = 6.5 Hz, 1H), 2.90 (dd,  $J$  = 16.8, 6.0 Hz, 1H), 2.54 (dd,  $J$  = 16.8, 8.0 Hz, 1H), 1.36 - 1.25 (m, 9H) ppm.  $^{13}\text{C}$  NMR (101 MHz,  $\text{CDCl}_3$ )  $\delta$  170.9, 167.4, 166.3, 162.1 (d,  $J$  = 249.1 Hz), 150.1, 145.8, 134.3, 131.5 (d,  $J$  = 3.5 Hz), 130.0 (d,  $J$  = 8.2 Hz), 129.2, 124.1, 123.8, 115.8 (d,  $J$  = 21.6 Hz), 76.3, 63.0 (d,  $J$  = 18.8 Hz), 61.1, 50.8, 49.5, 34.9, 14.2, 14.0, 13.9 ppm. HRMS (ESI)  $m/z$ :  $[\text{M}+\text{Na}]^+$  calcd for  $\text{C}_{27}\text{H}_{29}\text{FN}_2\text{NaO}_{10}\text{S}^+$ : 615.1419; Found: 615.1422.

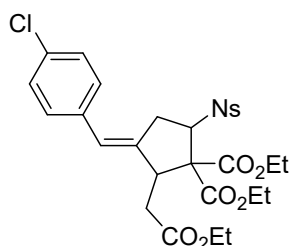

**Diethyl-(Z)-4-(4-chlorobenzylidene)-3-(2-ethoxy-2-oxoethyl)-1-((4-nitrophenyl)sulfonyl)pyrrolidine-2,2-dicarboxylate 3ja**

Yellow oil, 43.5 mg, 72% yield.  $^1\text{H}$  NMR (300 MHz,  $\text{CDCl}_3$ )  $\delta$  8.38 (d,  $J$  = 8.9 Hz, 2H), 8.25 (d,  $J$  = 8.9 Hz, 2H), 7.32 (d,  $J$  = 8.4 Hz, 2H), 7.02 (d,  $J$  = 8.5 Hz, 2H), 6.30 (d,  $J$  = 1.6 Hz, 1H), 4.41 - 4.22 (m, 6H), 4.19 - 4.11 (m, 2H), 4.04 (t,  $J$  = 6.5 Hz, 1H), 2.89 (dd,  $J$  = 16.8, 6.0 Hz, 1H), 2.53 (dd,  $J$  = 16.8, 8.0 Hz, 1H), 1.35 - 1.23 (m, 9H)

ppm.  $^{13}\text{C}$  NMR (101 MHz,  $\text{CDCl}_3$ )  $\delta$  170.8, 167.4, 166.3, 150.1, 145.7, 135.3, 133.7, 129.5, 129.2, 128.9, 124.1, 123.7, 76.3, 63.1, 62.9, 61.1, 50.8, 49.6, 34.9, 14.2, 14.0, 13.9 ppm. HRMS (ESI)  $m/z$ :  $[\text{M}+\text{Na}]^+$  calcd for  $\text{C}_{27}\text{H}_{29}\text{ClN}_2\text{NaO}_{10}\text{S}^+$ : 631.1124; Found: 631.1125.

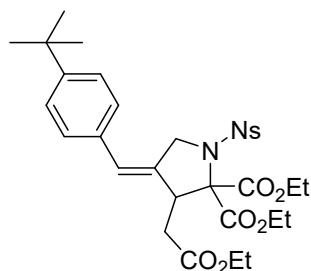

**Diethyl-(Z)-4-(4-(tert-butyl)benzylidene)-3-(2-ethoxy-2-oxoethyl)-1-((4-nitrophenyl)sulfonyl)pyrrolidine-2,2-dicarboxylate 3ka**

Yellow oil, 45.0 mg, 72% yield.  $^1\text{H}$  NMR (300 MHz,  $\text{CDCl}_3$ )  $\delta$  8.39 (d,  $J = 8.9$  Hz, 2H), 8.27 (d,  $J = 8.9$  Hz, 2H), 7.38 (d,  $J = 8.3$  Hz, 2H), 7.04 (d,  $J = 8.3$  Hz, 2H), 6.34 (s, 1H), 4.39 - 4.22 (m, 6H), 4.19 - 4.11 (m, 2H), 4.06 (t,  $J = 6.6$  Hz, 1H), 2.88 (dd,  $J = 16.8, 6.2$  Hz, 1H), 2.54 (dd,  $J = 16.8, 7.9$  Hz, 1H), 1.36-1.26 (m, 18H) ppm.  $^{13}\text{C}$  NMR (101 MHz,  $\text{CDCl}_3$ )  $\delta$  171.0, 167.5, 166.4, 151.1, 150.1, 145.8, 133.5, 132.5, 129.3, 128.1, 125.6, 124.8, 124.1, 76.4, 63.0, 62.9, 61.0, 50.9, 49.6, 34.7, 31.2, 14.2, 14.0, 13.9 ppm. HRMS (ESI)  $m/z$ :  $[\text{M}+\text{Na}]^+$  calcd for  $\text{C}_{31}\text{H}_{38}\text{N}_2\text{NaO}_{10}\text{S}^+$ : 653.2139 ; Found: 653.2151.

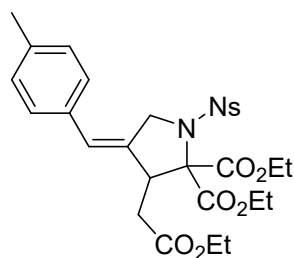

**Diethyl-(Z)-3-(2-ethoxy-2-oxoethyl)-4-(4-methylbenzylidene)-1-((4-nitrophenyl)sulfonyl)pyrrolidine-2,2-dicarboxylate 3la**

Yellow oil, 47.7 mg, 81% yield.  $^1\text{H}$  NMR (400 MHz,  $\text{CDCl}_3$ )  $\delta$  8.41 - 8.37 (m, 2H), 8.30 - 8.24 (m, 2H), 7.16 (d,  $J = 7.9$  Hz, 2H), 7.00 (d,  $J = 8.1$  Hz, 2H), 6.33 (d,  $J = 1.7$  Hz, 1H), 4.40 - 4.21 (m, 6H), 4.19 - 4.12 (m, 2H), 4.06 (t,  $J = 6.6$  Hz, 1H), 2.89 (dd,  $J$

= 16.8, 6.2 Hz, 1H), 2.55 (dd,  $J$  = 16.8, 7.9 Hz, 1H), 2.36 (s, 3H), 1.36 - 1.25 (m, 9H) ppm.  $^{13}\text{C}$  NMR (101 MHz,  $\text{CDCl}_3$ )  $\delta$  171.0, 167.5, 166.4, 150.1, 145.8, 137.8, 133.4, 132.5, 129.4, 129.2, 128.3, 124.8, 124.0, 76.3, 63.0, 62.9, 61.0, 50.9, 49.6, 35.0, 21.2, 14.2, 14.0, 13.9 ppm. HRMS (ESI)  $m/z$ :  $[\text{M}+\text{Na}]^+$  calcd for  $\text{C}_{28}\text{H}_{32}\text{N}_2\text{NaO}_{10}\text{S}^+$ : 611.1670 ; Found: 611.1675.

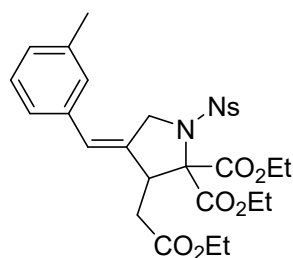

**Diethyl-(Z)-3-(2-ethoxy-2-oxoethyl)-4-(3-methylbenzylidene)-1-((4-nitrophenyl)sulfonyl)pyrrolidine-2,2-dicarboxylate 3ma**

Yellow oil, 51.4 mg, 87% yield.  $^1\text{H}$  NMR (400 MHz,  $\text{CDCl}_3$ )  $\delta$  8.43 - 8.36 (m, 2H), 8.31 - 8.23 (m, 2H), 7.25 (t,  $J$  = 7.6 Hz, 1H), 7.13 - 7.09 (m, 1H), 6.95 - 6.88 (m, 2H), 6.34 (d,  $J$  = 1.8 Hz, 1H), 4.39 - 4.13 (m, 8H), 4.07 (t,  $J$  = 7.4 Hz, 1H), 2.90 (dd,  $J$  = 16.8, 6.1 Hz, 1H), 2.55 (dd,  $J$  = 16.8, 8.0 Hz, 1H), 2.36 (s, 3H), 1.35 - 1.26 (m, 9H) ppm.  $^{13}\text{C}$  NMR (101 MHz,  $\text{CDCl}_3$ )  $\delta$  170.9, 167.5, 166.4, 145.8, 138.3, 135.3, 134.2, 129.2, 128.7, 128.6, 125.2, 124.1, 76.3, 63.1, 62.9, 61.0, 50.9, 49.5, 35.0, 21.5, 14.2, 14.0, 13.9 ppm. HRMS (ESI)  $m/z$ :  $[\text{M}+\text{Na}]^+$  calcd for  $\text{C}_{28}\text{H}_{32}\text{N}_2\text{NaO}_{10}\text{S}^+$ : 611.1670 ; Found: 611.1681.

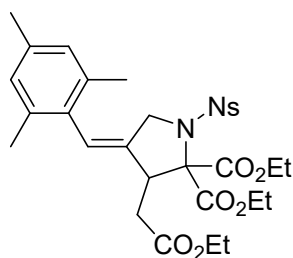

**Diethyl-(Z)-3-(2-ethoxy-2-oxoethyl)-1-((4-nitrophenyl)sulfonyl)-4-(2,4,6-trimethylbenzylidene)pyrrolidine-2,2-dicarboxylate 3na**

Yellow oil, 28.5 mg, 45% yield.  $^1\text{H}$  NMR (300 MHz,  $\text{CDCl}_3$ )  $\delta$  8.39 - 8.26 (m, 2H), 8.13 (d,  $J$  = 8.9 Hz, 2H), 6.85 (s, 2H), 6.26 (s, 1H), 4.44 - 4.11 (m, 6H), 4.03 (t,  $J$  = 6.5 Hz, 1H), 3.81 - 3.59 (m, 2H), 2.92 (dd,  $J$  = 16.8, 5.5 Hz, 1H), 2.59 (dd,  $J$  = 16.8,

8.5 Hz, 1H), 2.28 (s, 3H), 2.05 (s, 6H), 1.40 - 1.25 (m, 9H) ppm.  $^{13}\text{C}$  NMR (75 MHz,  $\text{CDCl}_3$ )  $\delta$  170.9, 167.6, 166.5, 150.0, 145.7, 137.2, 136.6, 135.2, 131.6, 129.1, 128.3, 123.9, 123.8, 77.3, 63.0, 62.9, 61.1, 49.4, 49.2, 34.6, 21.0, 19.8, 14.19, 14.0, 13.9 ppm. HRMS (ESI)  $m/z$ :  $[\text{M}+\text{Na}]^+$  calcd for  $\text{C}_{30}\text{H}_{36}\text{N}_2\text{NaO}_{10}\text{S}^+$ : 639.1983; Found: 639.1993.

## 4. Transformations of products 3aa and 3ag

### (1) The Suzuki Coupling Reaction of 3ag

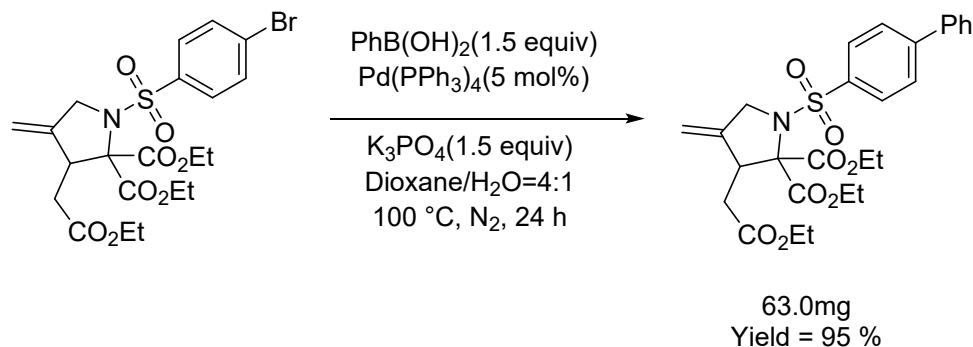

**3ag** (66.8 mg, 0.125 mmol, 1.0 equiv),  $\text{PhB}(\text{OH})_2$  (22.6 mg, 0.1875 mmol, 1.5 equiv),  $\text{Pd}(\text{PPh}_3)_4$  (7.2 mg, 0.00625 mmol, 5 mol%),  $\text{K}_3\text{PO}_4$  (39.7 mg, 0.1875 mmol, 1.5 equiv), 1,4-dioxane (2 mL) and  $\text{H}_2\text{O}$  (0.5 mL) were added into a 10 mL glass vial. The vial was purged with  $\text{N}_2$ . The reaction mixture was heated at  $100^\circ\text{C}$  for 24 h. After being cooled to room temperature, the mixture was poured into water (3 mL), then extracted with EtOAc (5 mL $\times$ 3). The combined organic layer was washed with brine (20 mL), dried with anhydrous  $\text{Na}_2\text{SO}_4$  and filtered. The filtrate was concentrated in vacuo and the residue was purified by silica gel column chromatography to give the desired product **95** % yield (63.0 mg).

### (2) Oxidation of 3aa with m-chloroperoxybenzoic acid (m-CPBA)

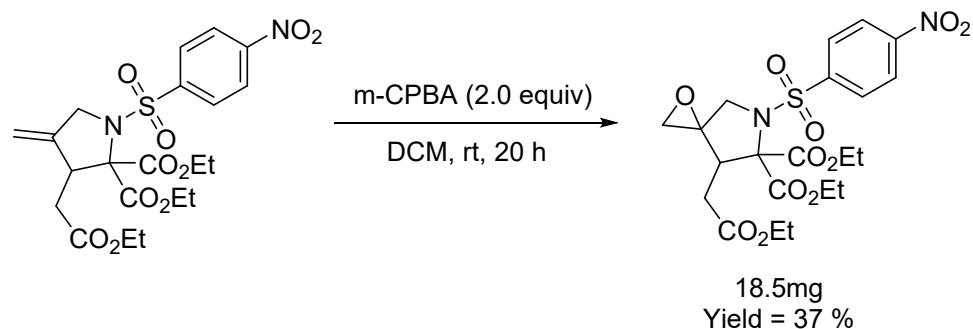



To a solution of **3aa** (49.8 mg, 0.10 mmol) in DCM (4 mL) was added 3-chloroperoxybenzoic acid (*m*-CPBA, 34.4 mg, 2.0 equiv.) at r.t. The reaction mixture was stirred for 20 h and poured into a saturated solution of aqueous sodium bicarbonate. The two layers were separated and the organic layer was washed with a saturated solution of aqueous sodium bicarbonate. This procedure was repeated twice more. The organic layer was dried over MgSO<sub>4</sub>, filtered, and concentrated on a rotary evaporator. The crude product was purified by column chromatography to give desired product in 37 % yield (18.5 mg).

**Diethyl-7-(2-ethoxy-2-oxoethyl)-5-((4-nitrophenyl)sulfonyl)-1-oxa-5-azaspiro[2.4]heptane-6,6-dicarboxylate**

Yellow oil. 18.5 mg, 37.1% yield. <sup>1</sup>H NMR (400 MHz, CDCl<sub>3</sub>) δ 8.44 - 8.34 (m, 2H), 8.23 - 8.13 (m, 2H), 4.45 - 4.24 (m, 4H), 4.19 - 4.09 (m, 2H), 3.86 (d, *J* = 10.5 Hz, 1H), 3.65 - 3.53 (m, 2H), 2.87 (d, *J* = 3.8 Hz, 1H), 2.79 (d, *J* = 3.8 Hz, 1H), 2.66 (dd, *J* = 17.8, 5.0 Hz, 1H), 2.35 (dd, *J* = 17.8, 7.8 Hz, 1H), 1.39 - 1.33 (m, 6H), 1.27 (t, *J* = 7.1 Hz, 3H) ppm. <sup>13</sup>C NMR (101 MHz, CDCl<sub>3</sub>) δ 171.3, 167.2, 166.3, 150.1, 145.4, 129.2, 124.0, 76.5, 63.2, 62.9, 61.1, 52.1, 47.4, 46.7, 28.5, 14.1, 13.9, 13.9 ppm. HRMS (ESI) *m/z*: [M+Na]<sup>+</sup> calcd for C<sub>21</sub>H<sub>26</sub>N<sub>2</sub>NaO<sub>11</sub>S<sup>+</sup>: 537.1150; Found: 537.1157.

**(3) Decarboxylation of 3aa**

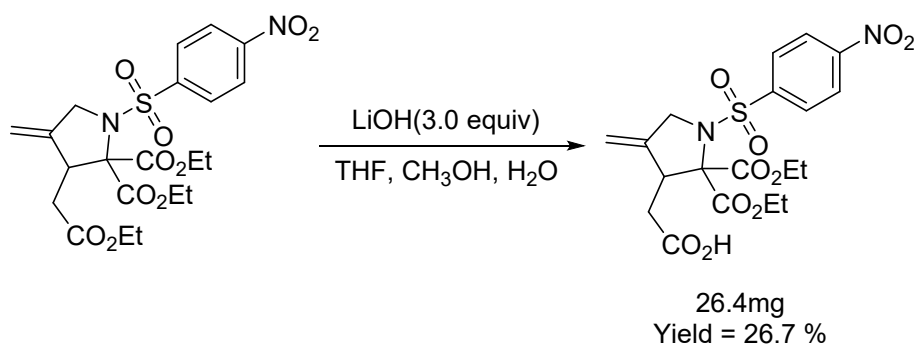

**3aa** (0.20 mmol) was added into a 50 mL round-bottomed flask, and 2 mL of tetrahydrofuran, 2 mL of methanol, 2 mL of water and LiOH·H<sub>2</sub>O (0.60 mmol) were added, and reacted at room temperature for 12 hours. Remove solvent with rotary evaporator, extract with dichloromethane and water, and collect water phase. Add

dilute hydrochloric acid into the water phase until the pH is equal to 1-2. Extract the aqueous phase with dichloromethane, collect the organic phase, dry the organic phase with MgSO<sub>4</sub>, filter, and concentrate on the rotary evaporator to remove the solvent. The crude product was purified by column chromatography, and the required product was obtained with 26.7% yield.

**2-(2,2-Bis(ethoxycarbonyl)-4-methylene-1-((4-nitrophenyl)sulfonyl)pyrrolidin-3-yl)acetic acid**

Colorless oil, 26.4 mg, 26.7% yield. <sup>1</sup>H NMR (400 MHz, CDCl<sub>3</sub>) δ 8.76 (s, 1H), 8.37 (d, *J* = 8.8 Hz, 2H), 8.10 (d, *J* = 8.8 Hz, 2H), 5.00 (d, *J* = 8.7 Hz, 2H), 4.35 - 4.06 (m, 6H), 3.86 (s, 1H), 2.62 - 2.37 (m, 2H), 1.26 - 1.15 (m, 6H) ppm. <sup>13</sup>C NMR (101 MHz, CDCl<sub>3</sub>) δ 176.8, 168.0, 166.9, 150.1, 145.4, 143.0, 128.76, 124.1, 108.2, 76.1, 63.1, 62.8, 52.1, 50.9, 35.5, 13.9, 13.8 ppm. HRMS (ESI) *m/z*: [M+Na]<sup>+</sup> calcd for C<sub>19</sub>H<sub>22</sub>N<sub>2</sub>NaO<sub>10</sub>S<sup>+</sup>: 493.0887; Found: 493.0895.

**5. Copies of <sup>1</sup>H NMR, <sup>13</sup>C NMR spectra**

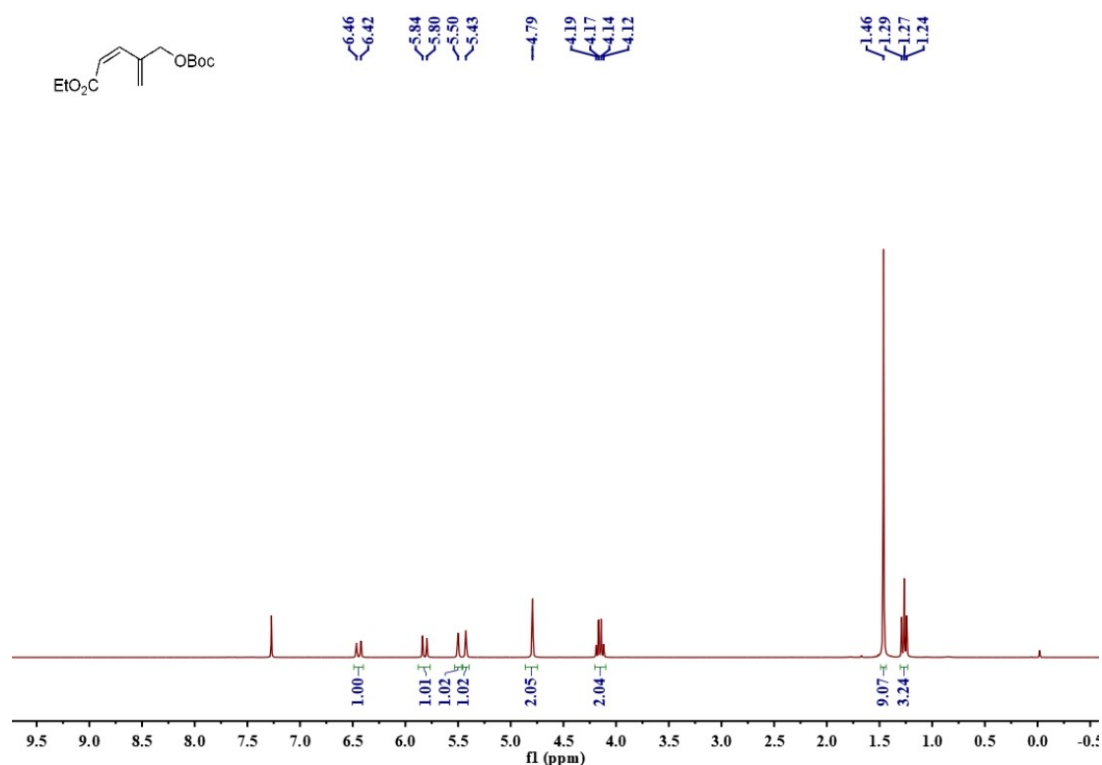

<sup>1</sup>H NMR (CDCl<sub>3</sub>, 300 MHz) NMR of *cis-1a*

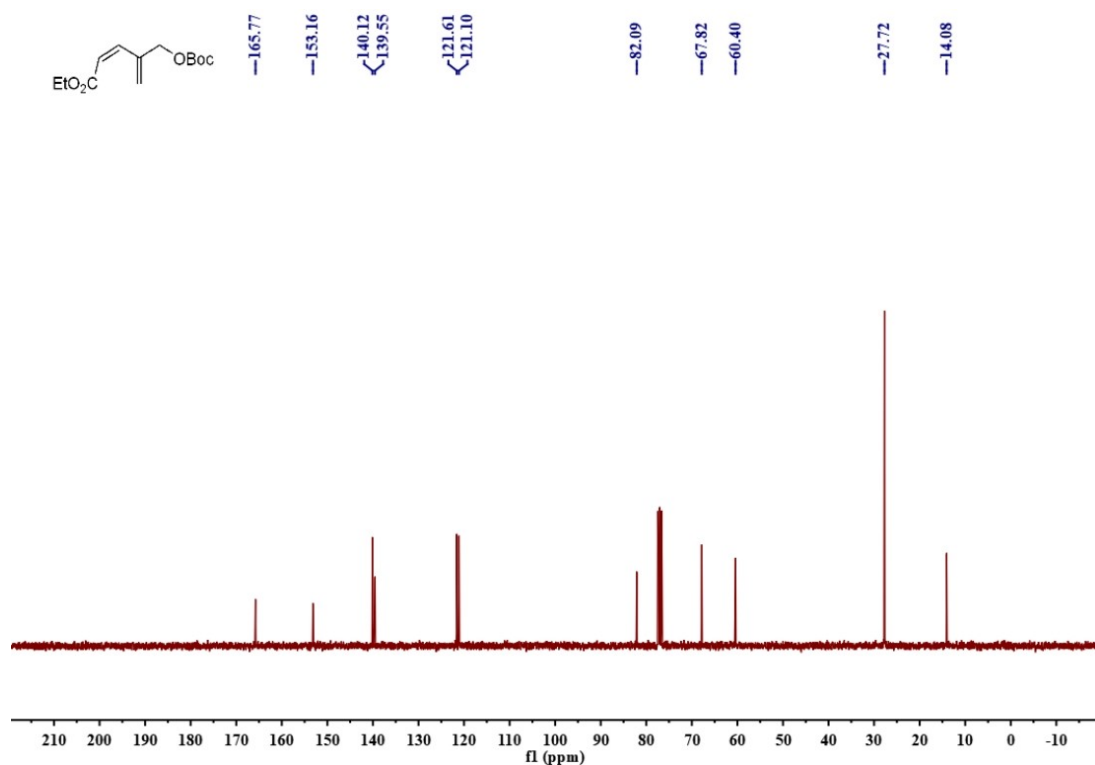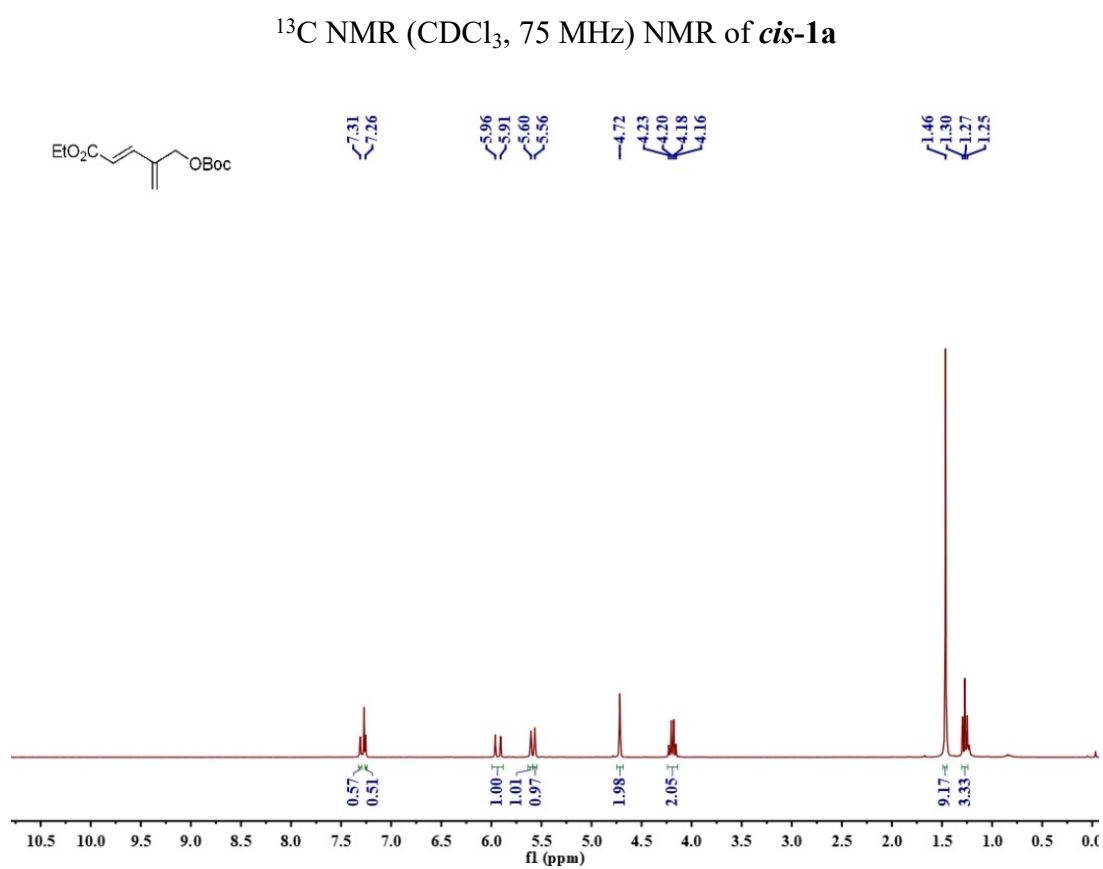

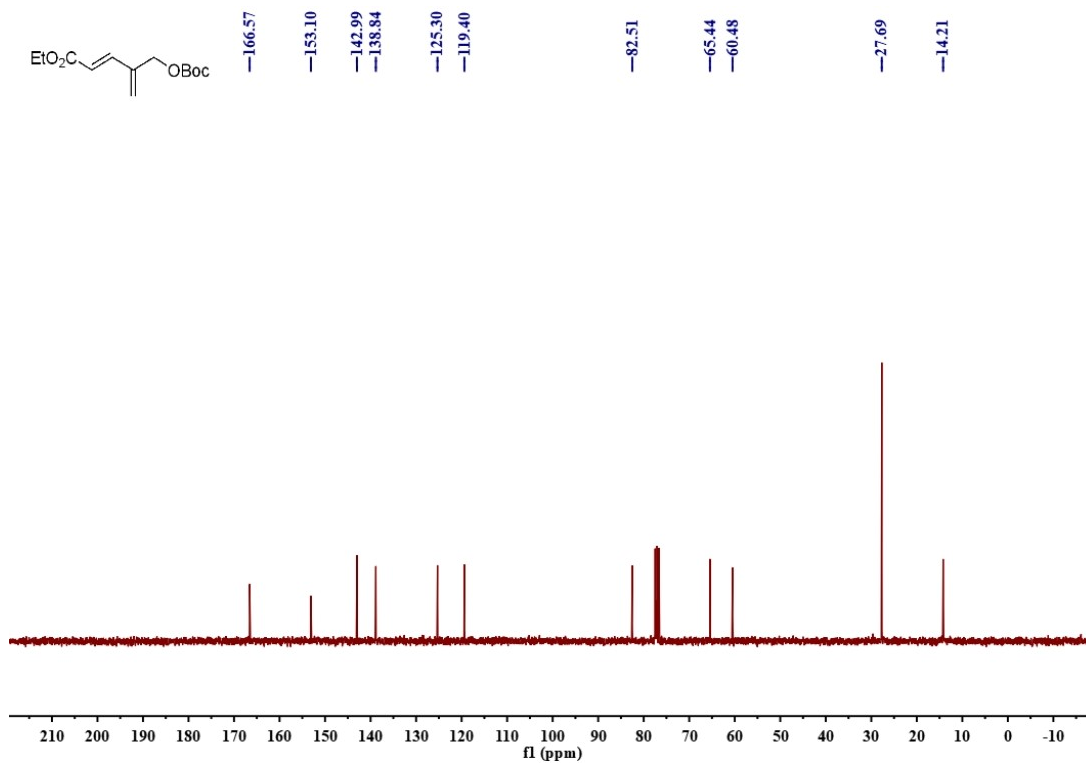

$^{13}\text{C}$  NMR (CDCl<sub>3</sub>, 75 MHz) NMR of *trans*-1a

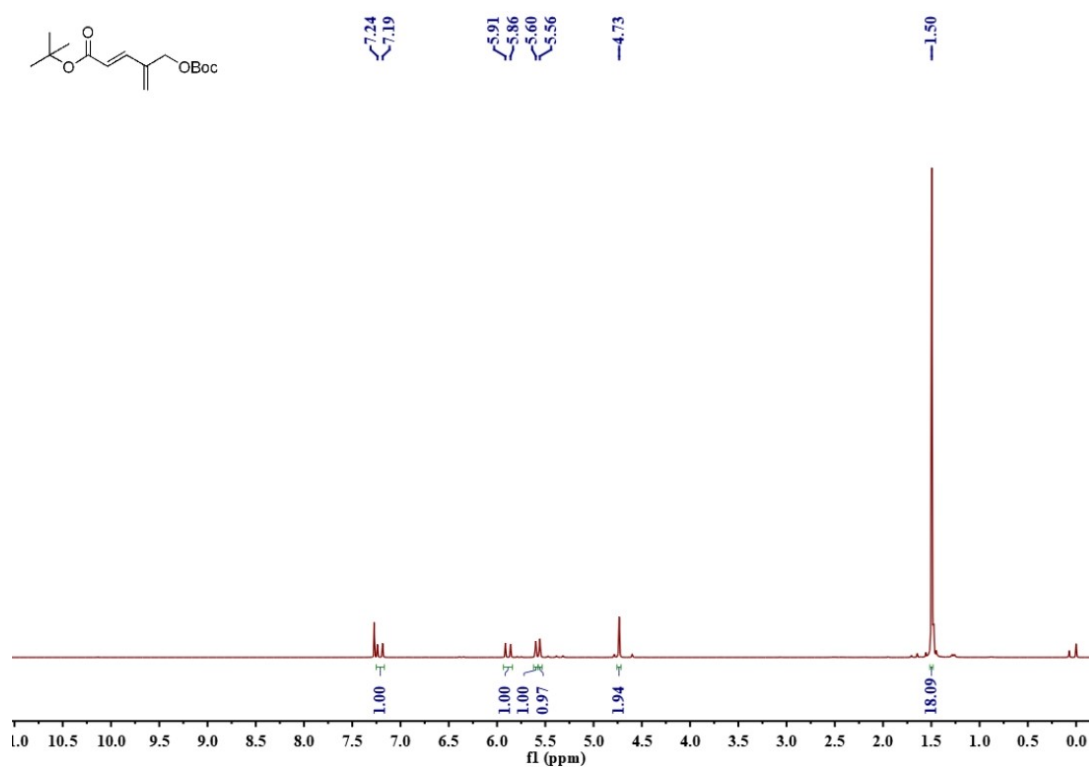

$^1\text{H}$  NMR (CDCl<sub>3</sub>, 300 MHz) NMR of *trans*-1b

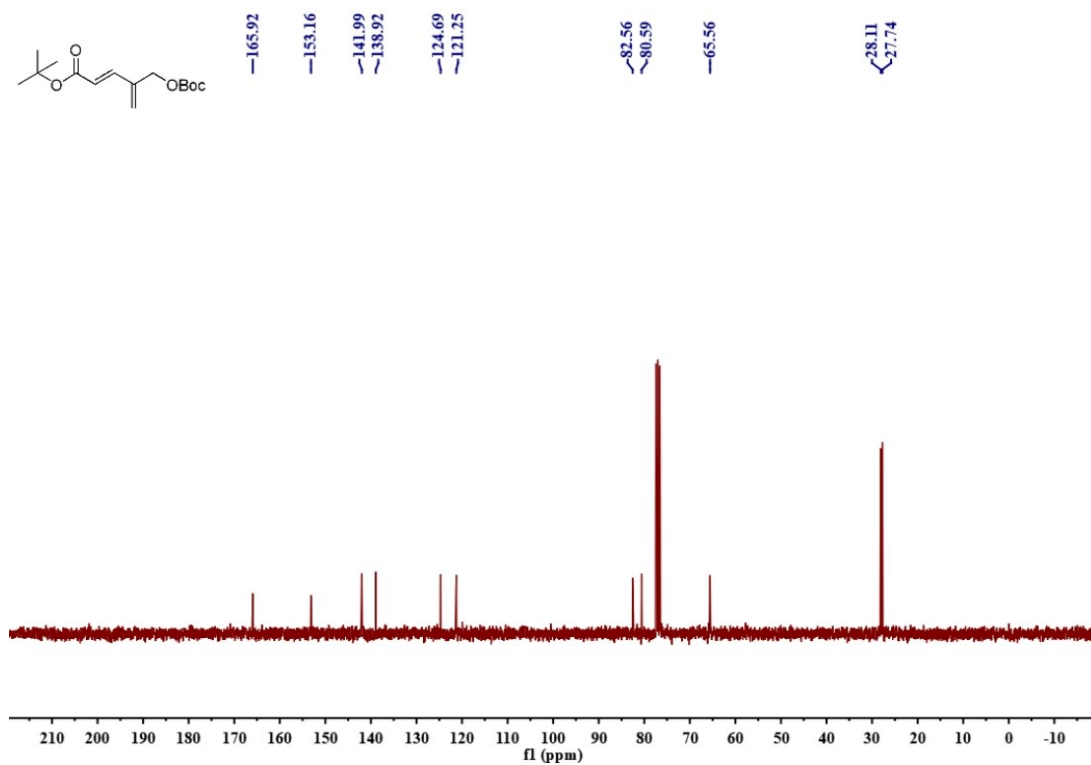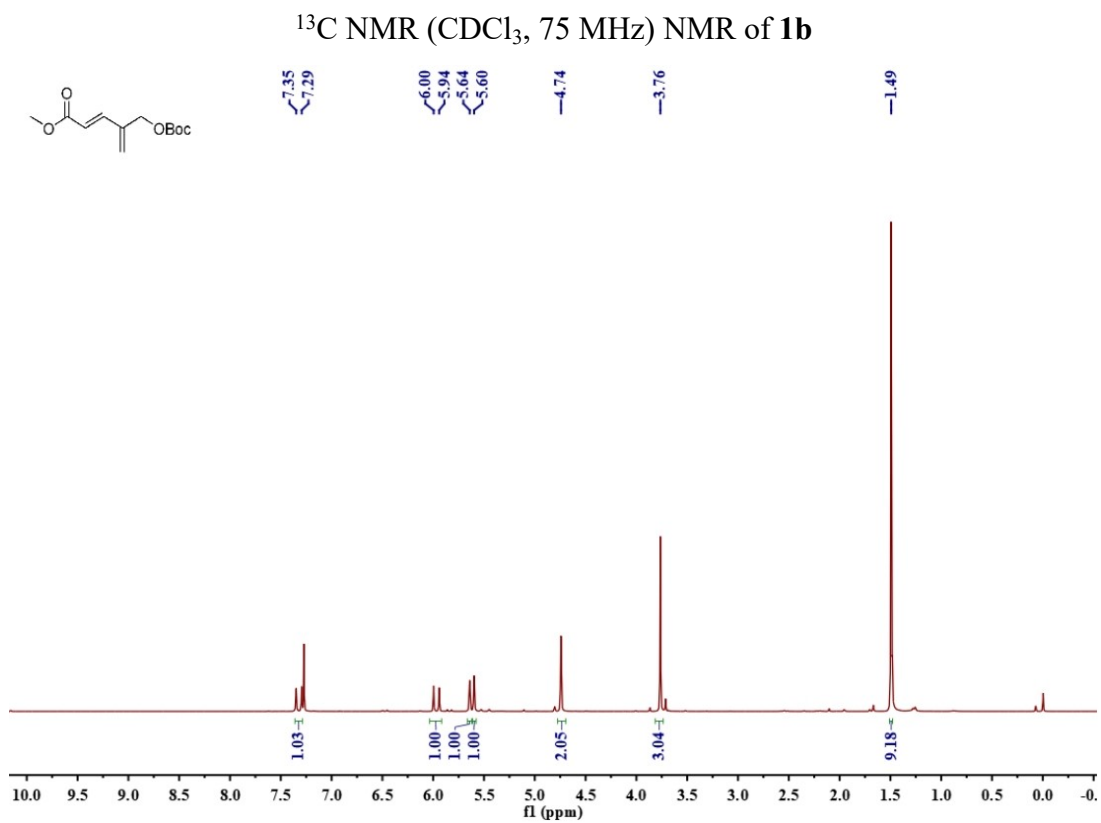

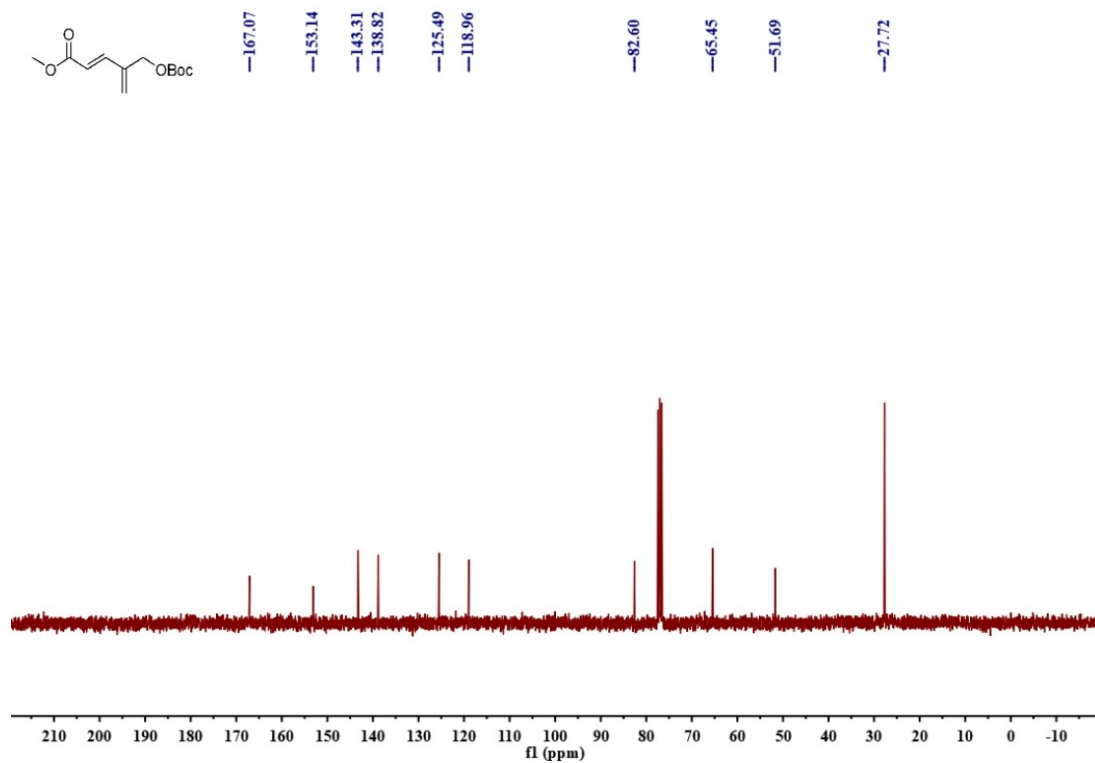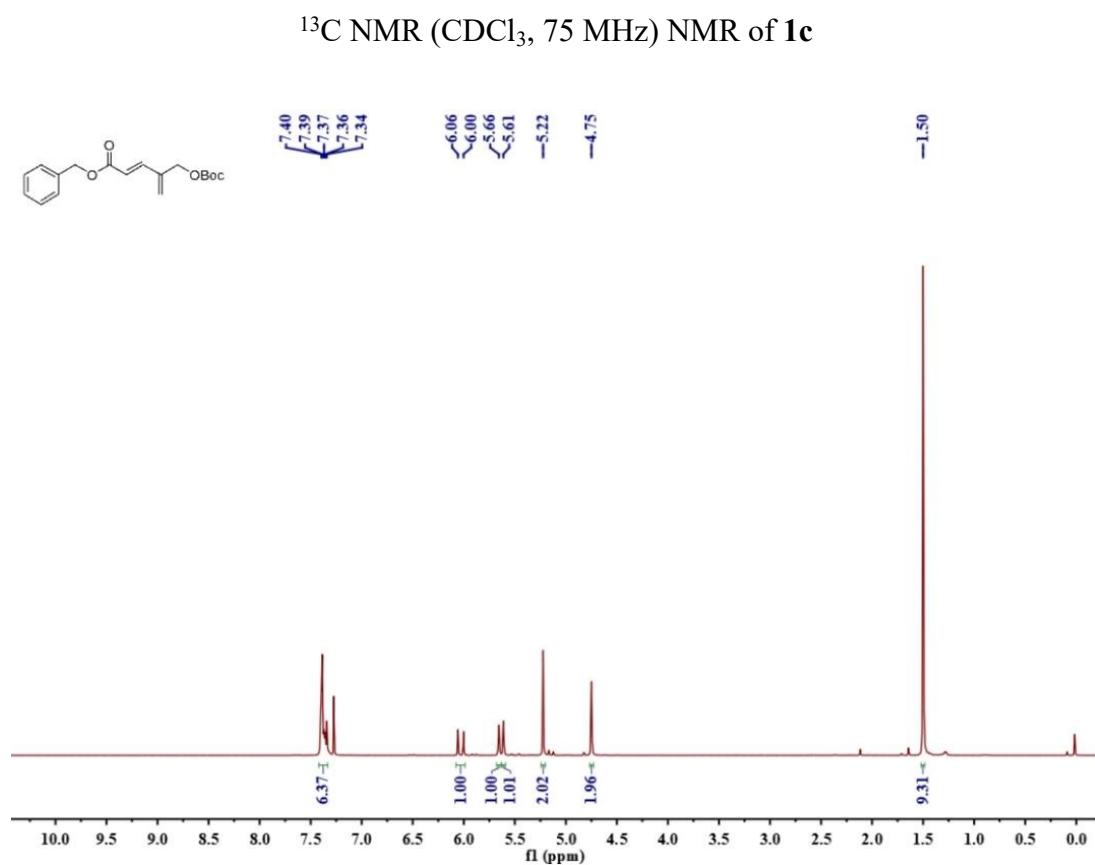

$^1\text{H}$  NMR (CDCl<sub>3</sub>, 300 MHz) NMR of **1d**

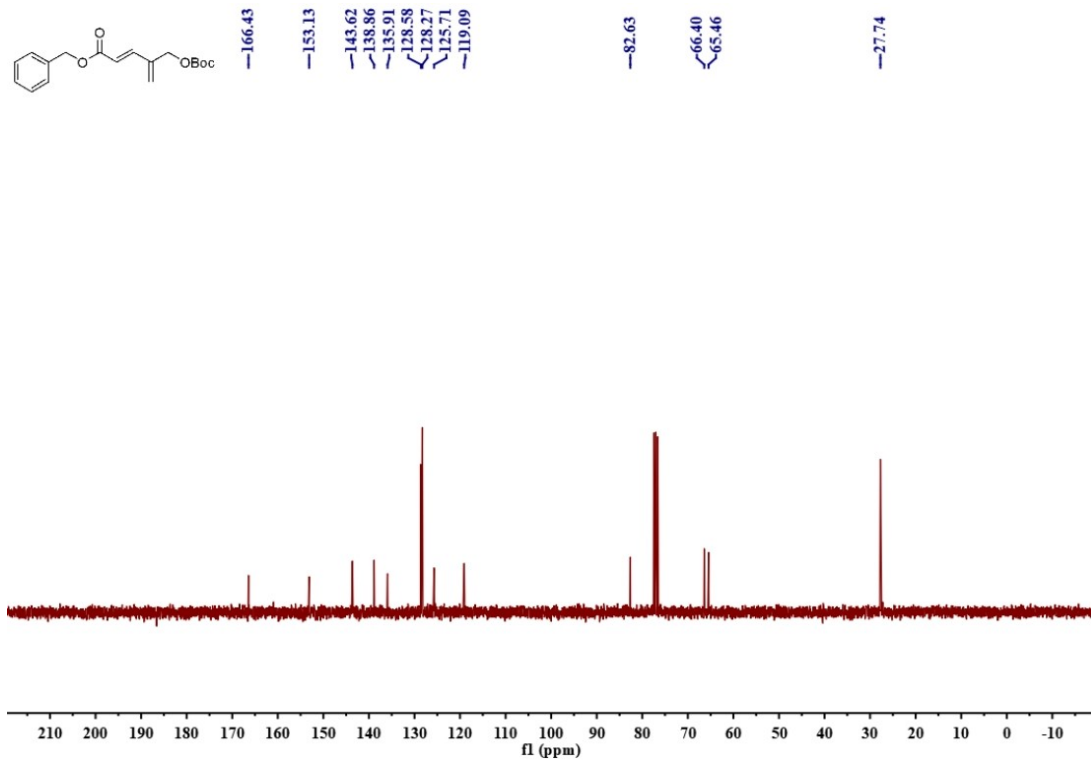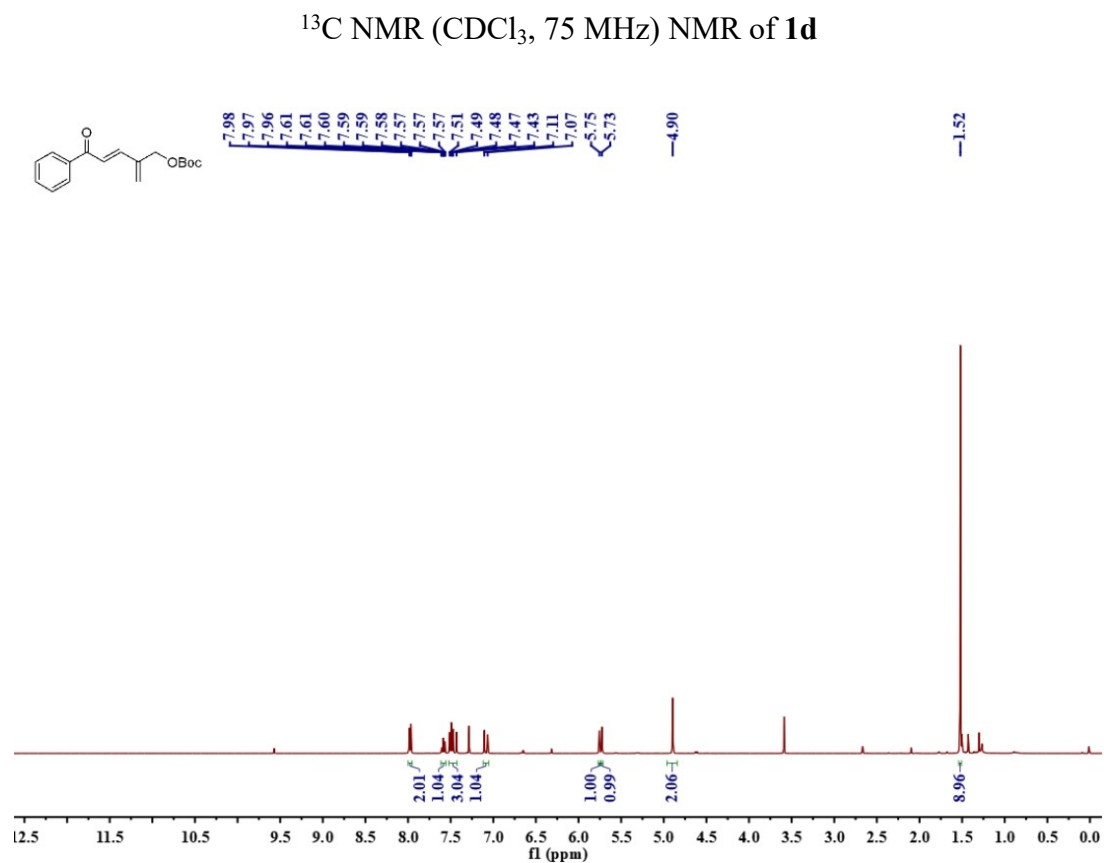

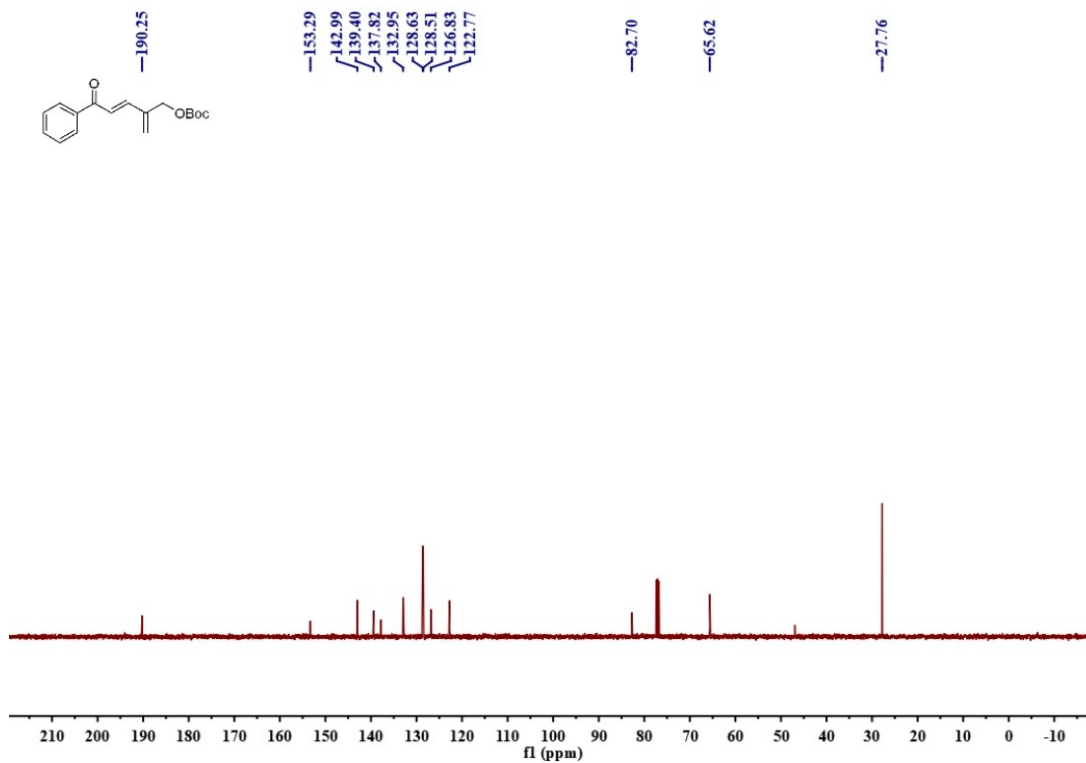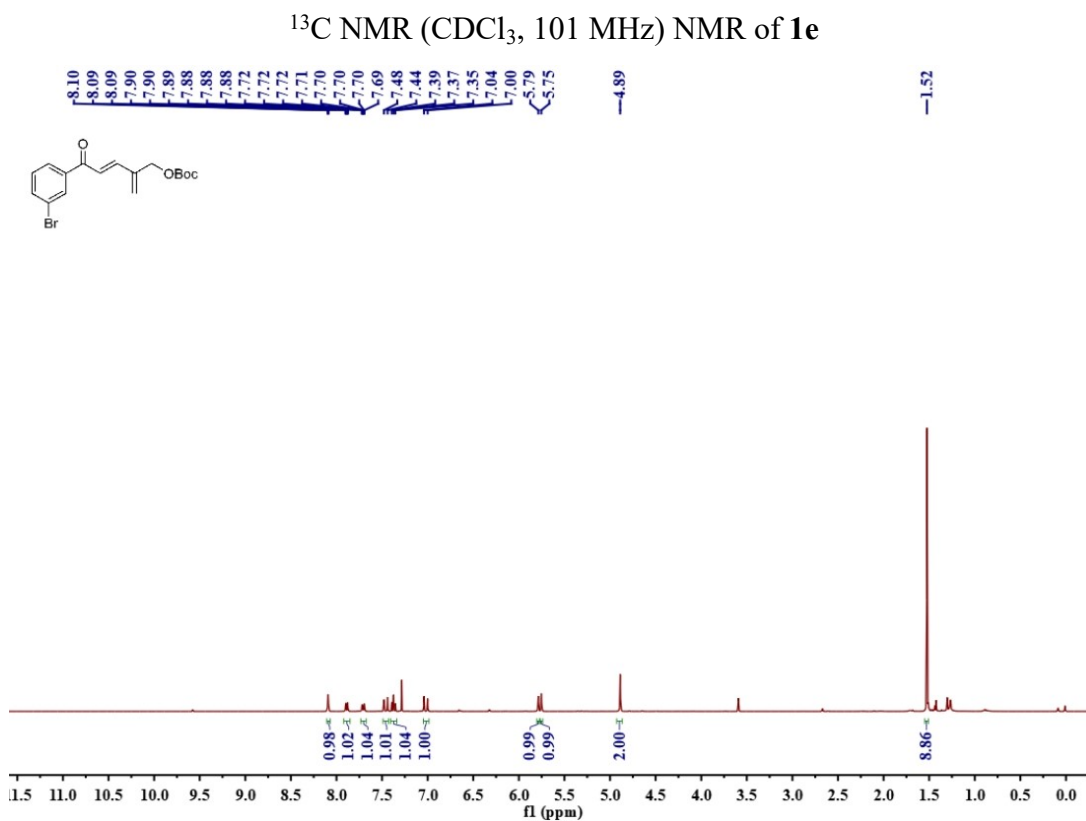



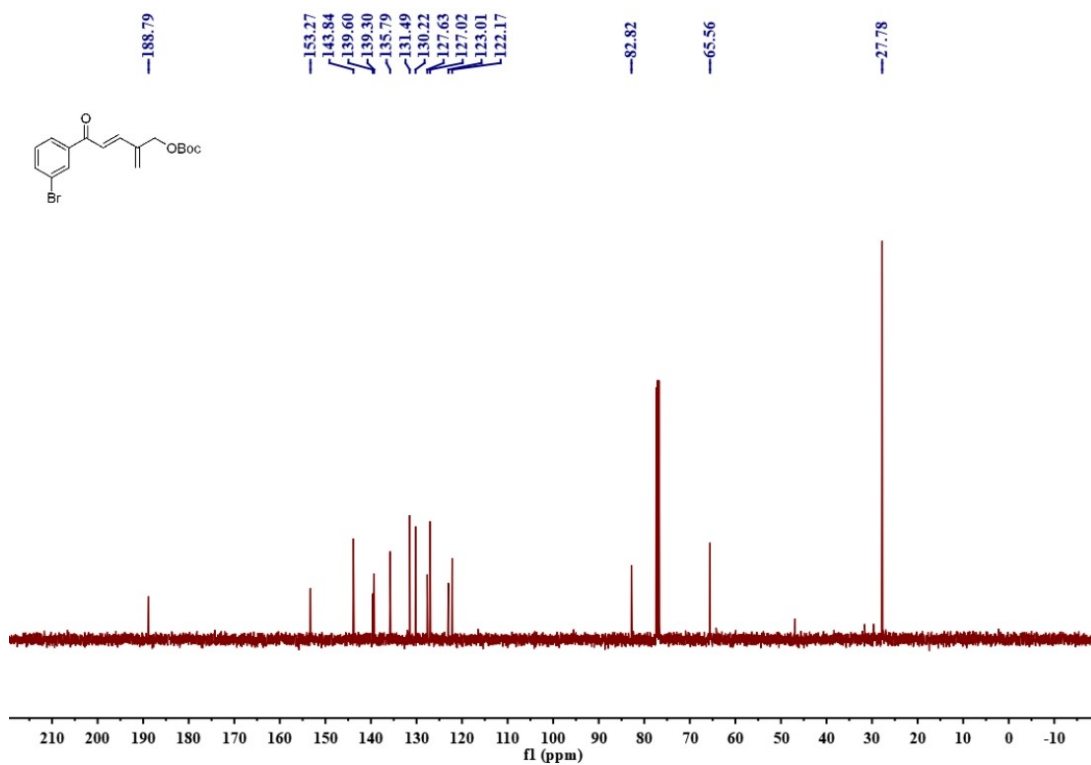

<sup>13</sup>C NMR (CDCl<sub>3</sub>, 101 MHz) NMR of **1f**

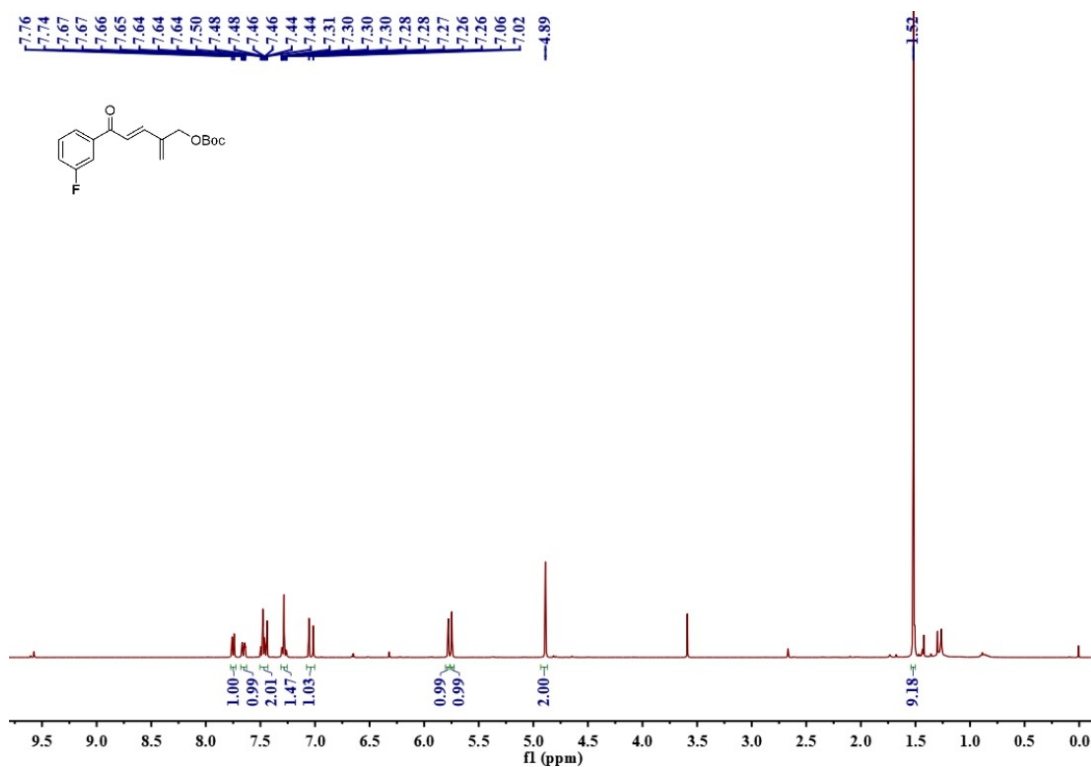

<sup>1</sup>H NMR (CDCl<sub>3</sub>, 400 MHz) NMR of **1g**

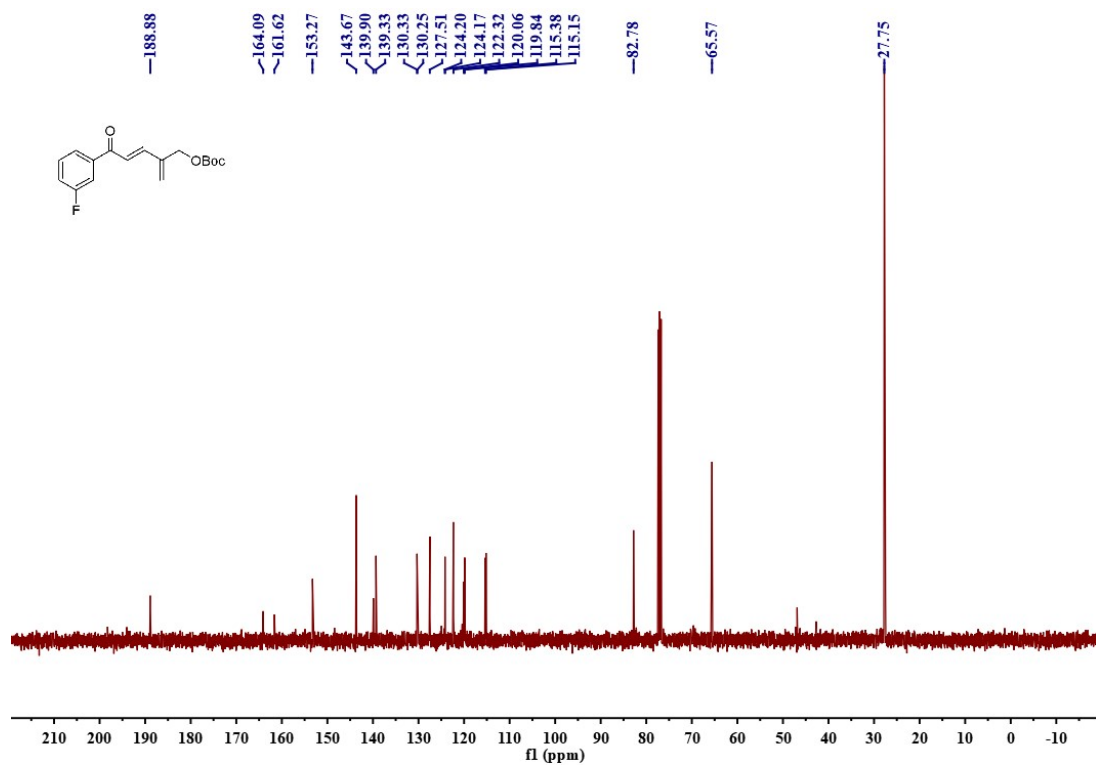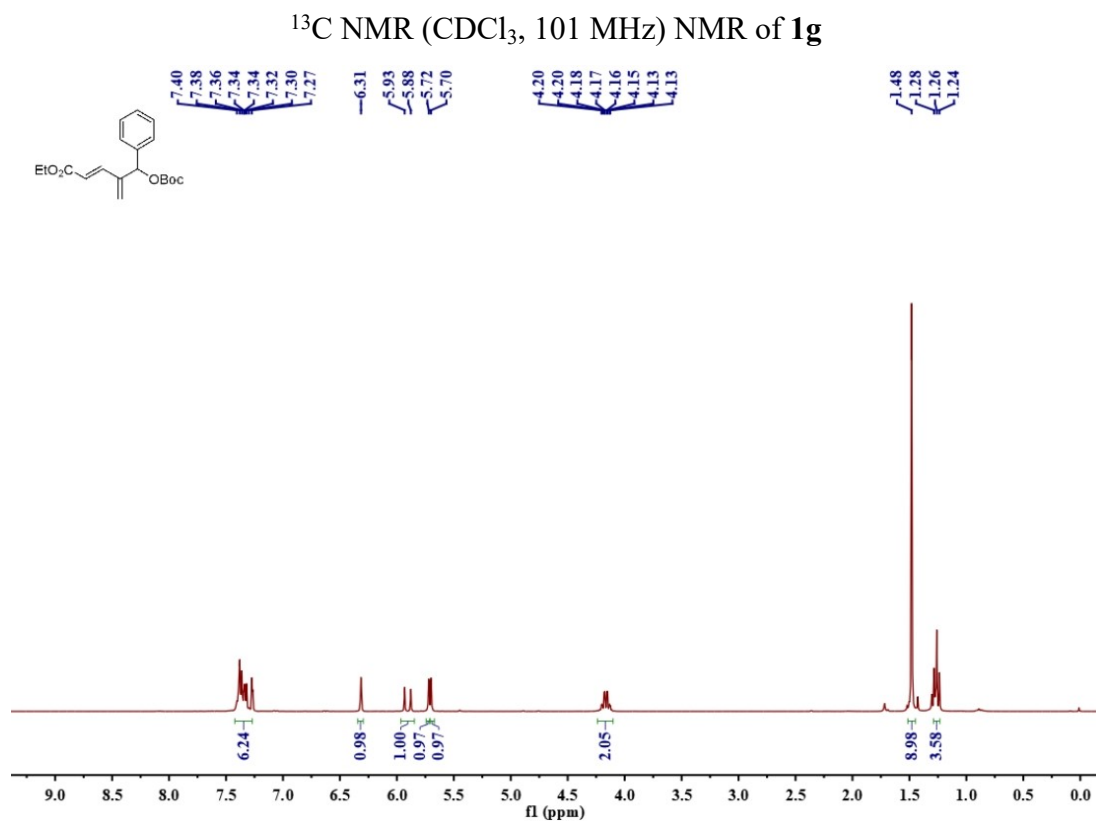

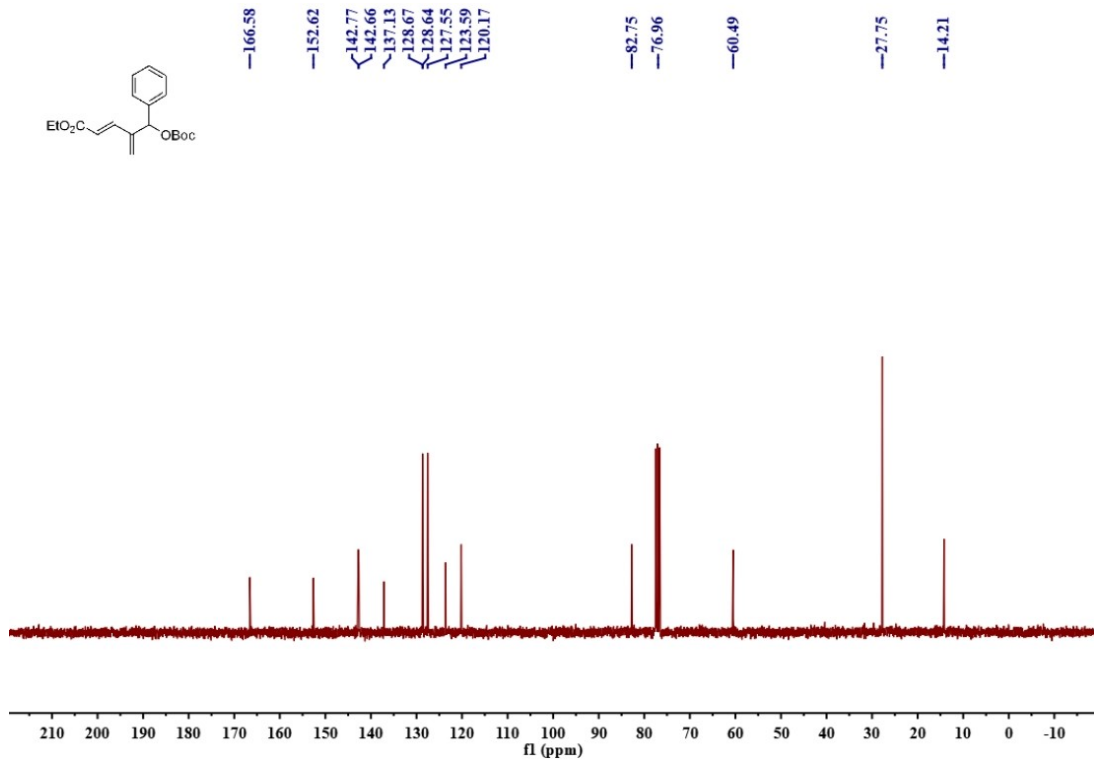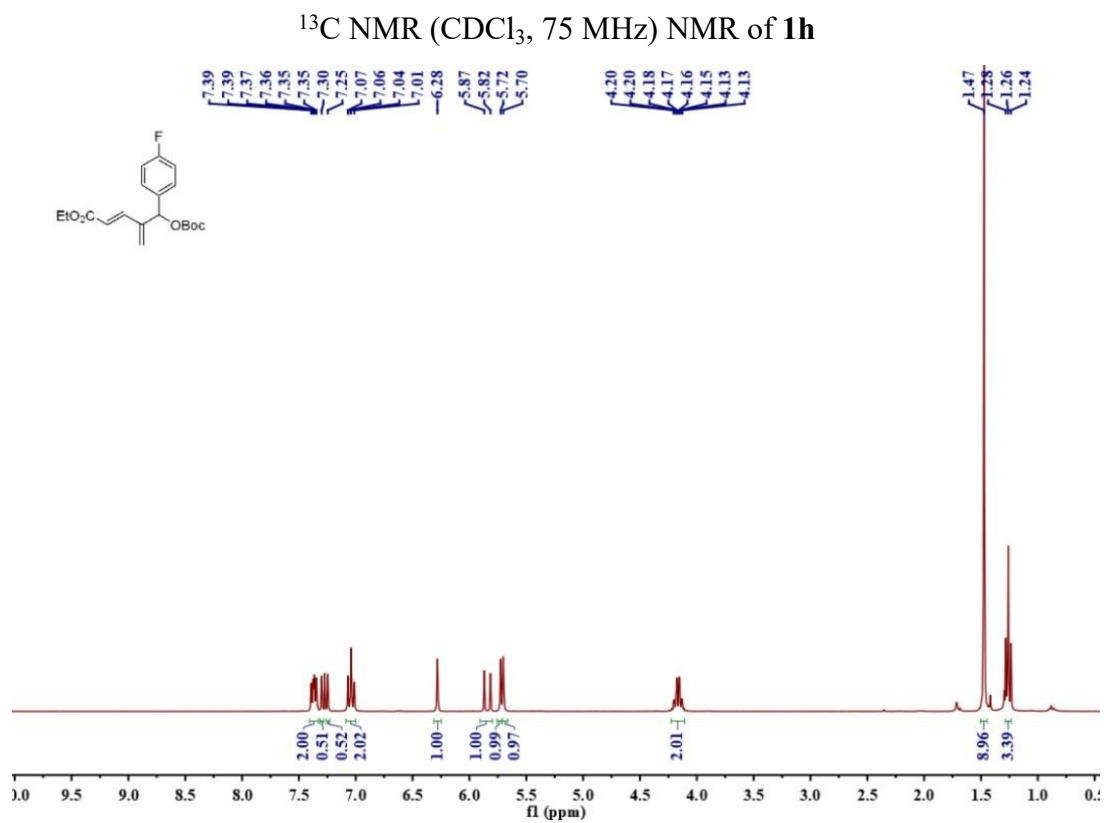

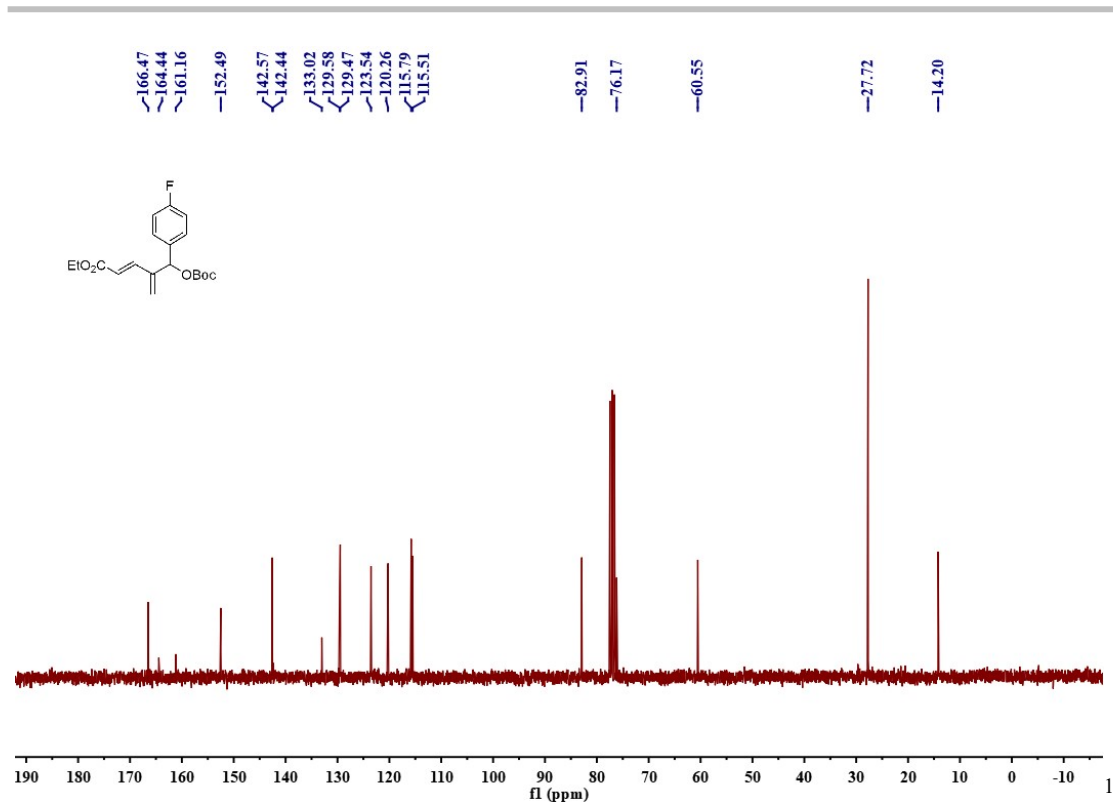

<sup>3</sup>C NMR (CDCl<sub>3</sub>, 75 MHz) NMR of **1i**

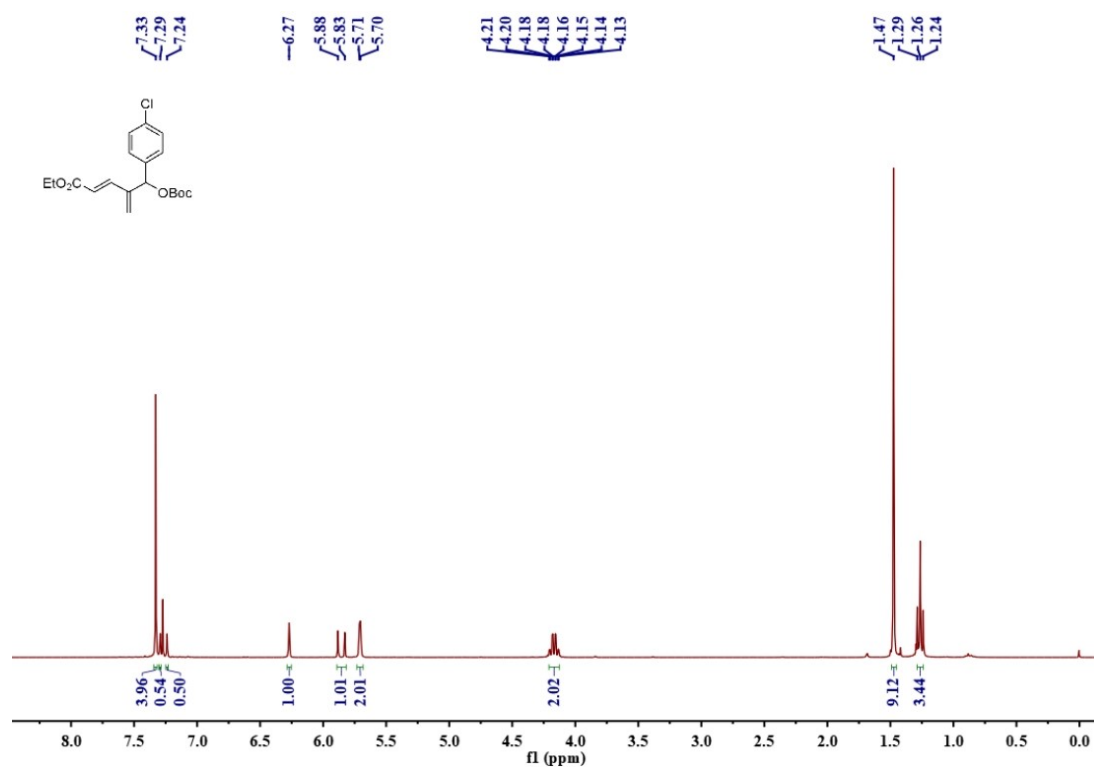

<sup>1</sup>H NMR (CDCl<sub>3</sub>, 300 MHz) NMR of **1j**

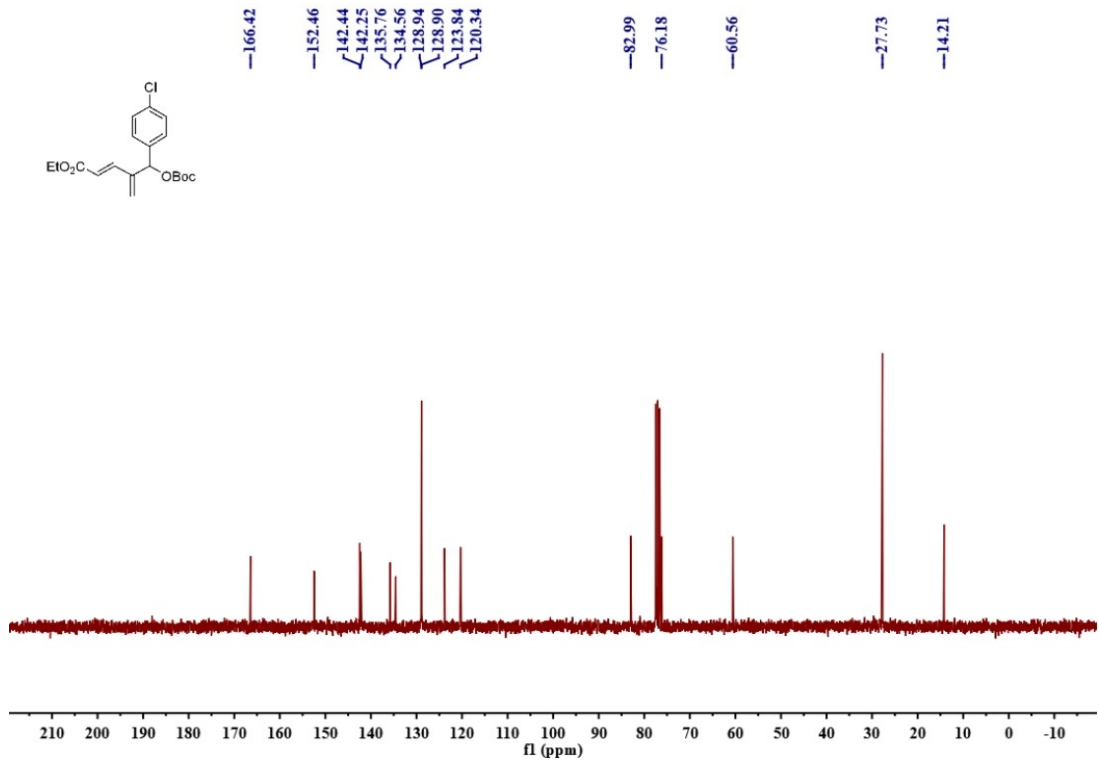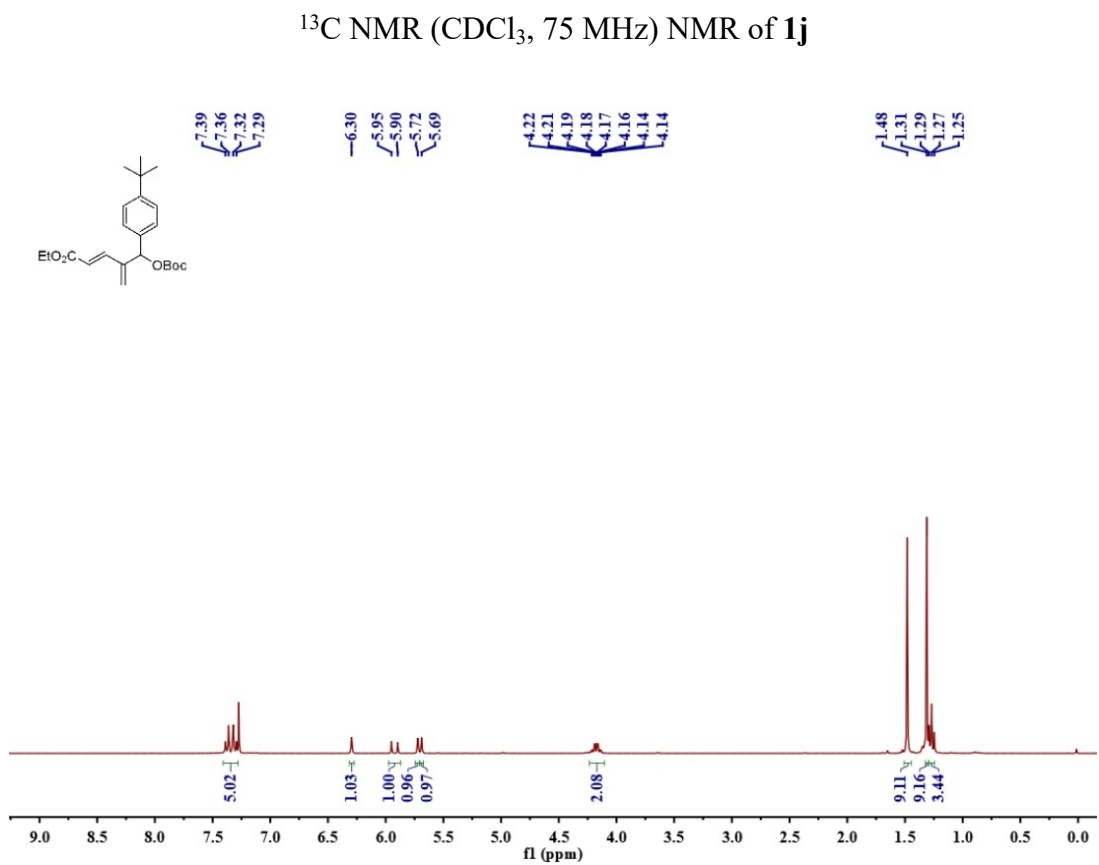

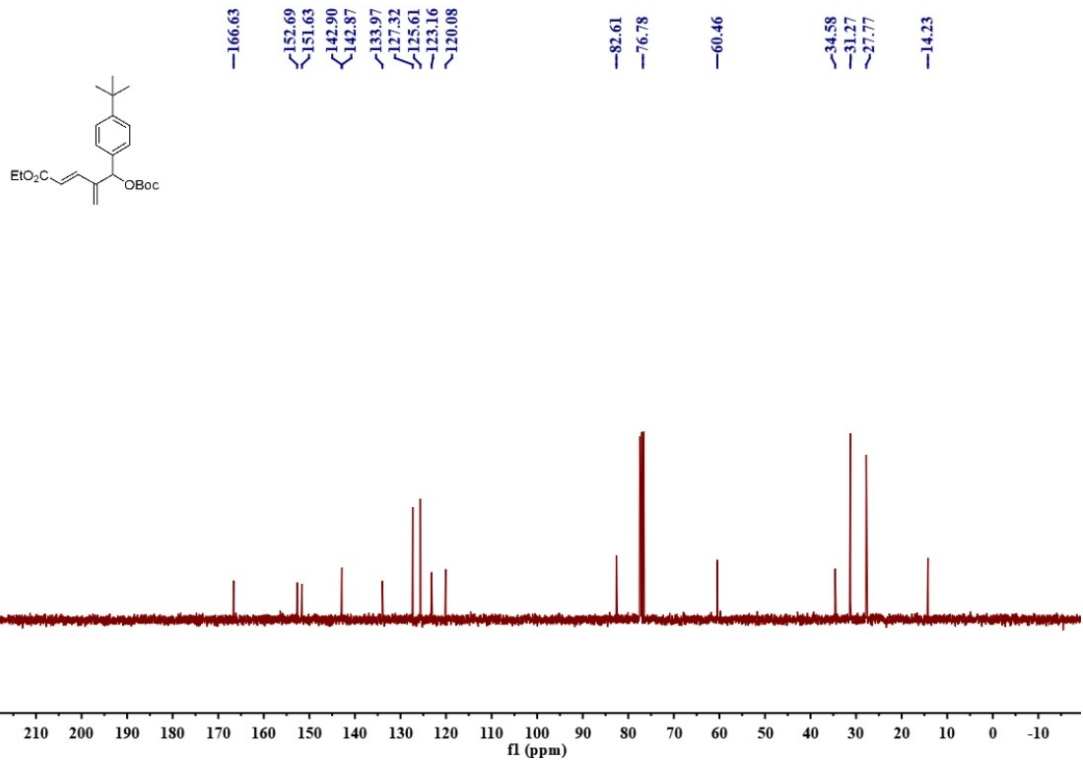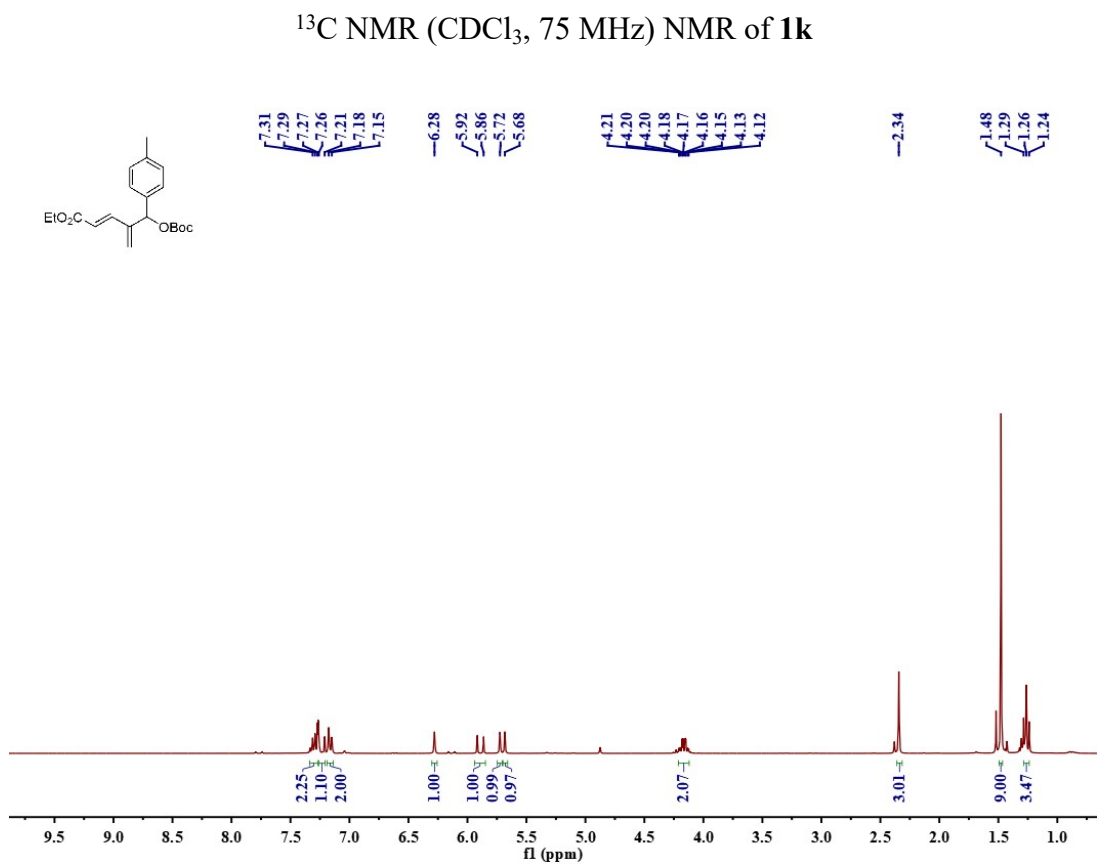

$^1\text{H}$  NMR (CDCl<sub>3</sub>, 300 MHz) NMR of **1l**

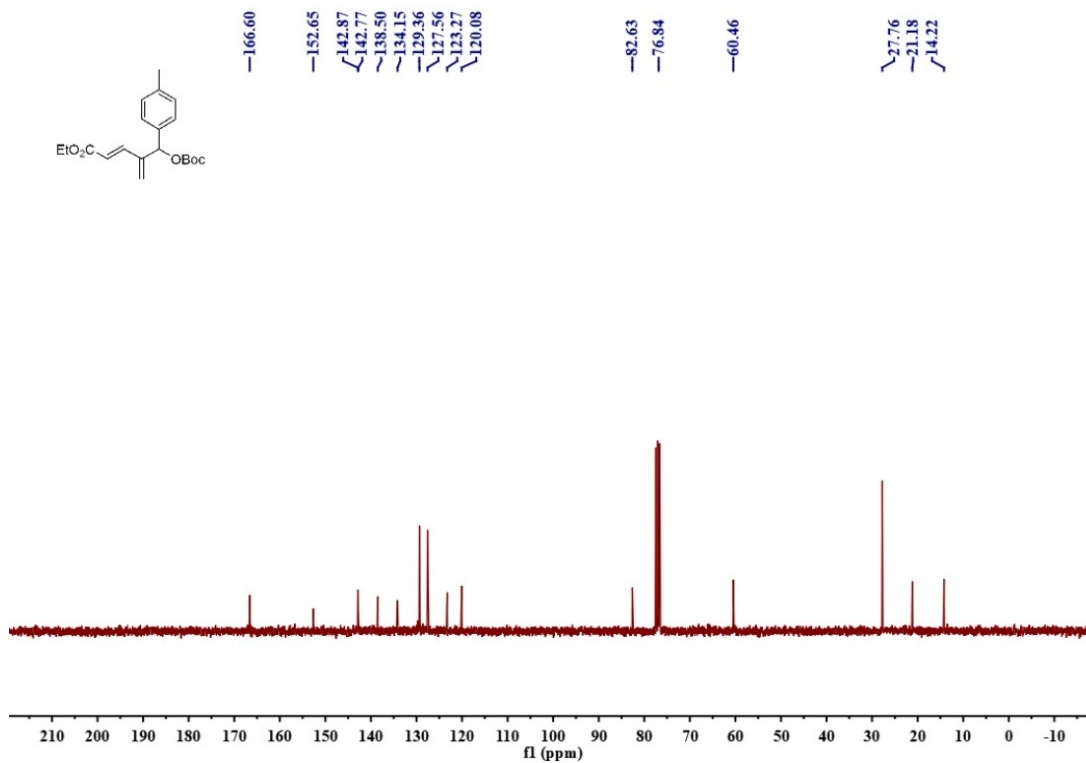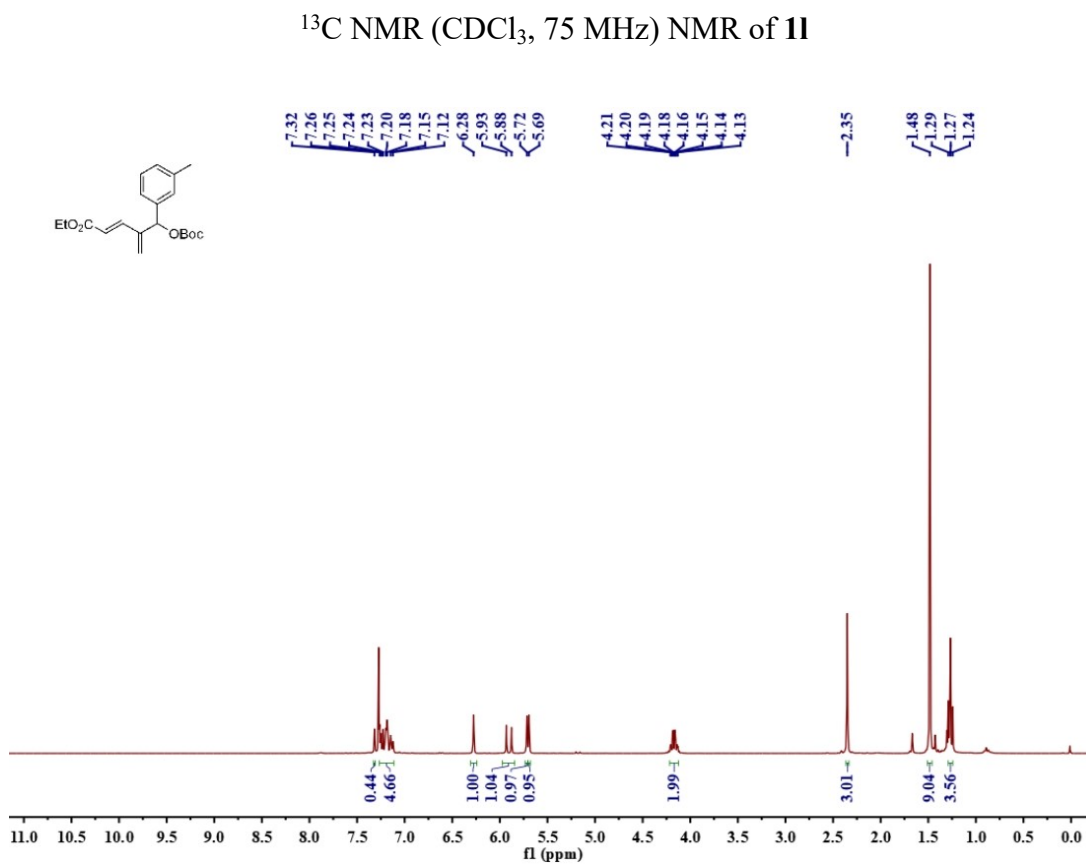

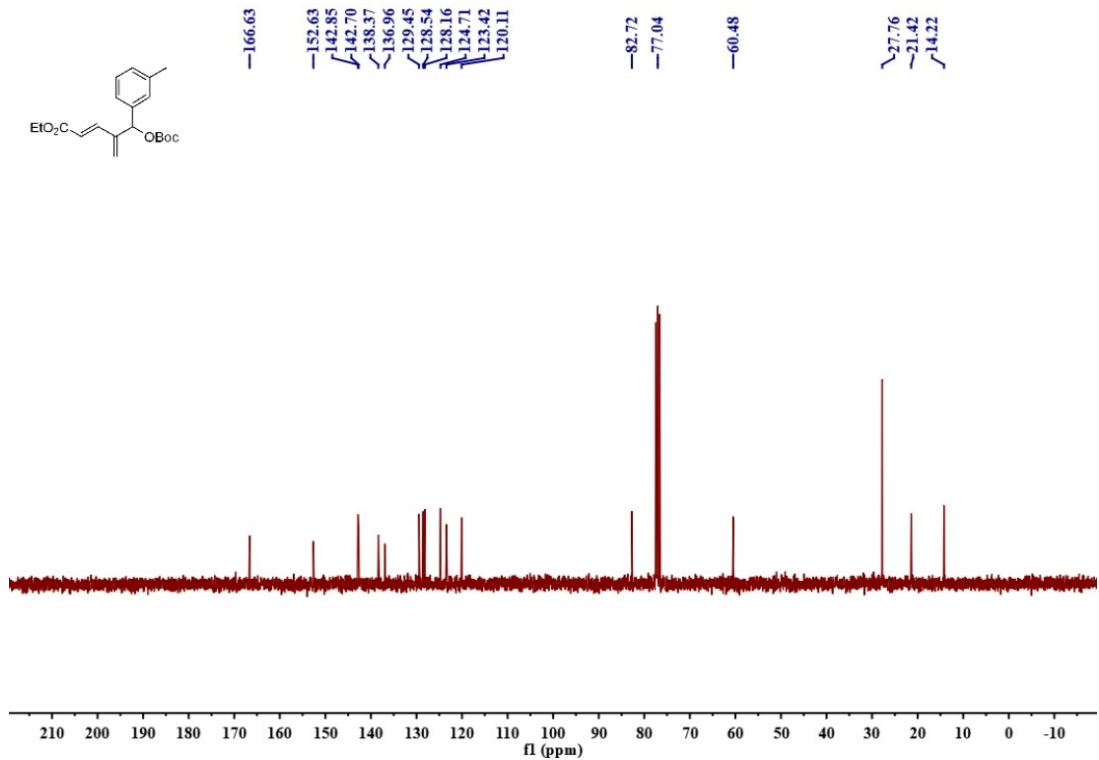

<sup>13</sup>C NMR (CDCl<sub>3</sub>, 75 MHz) NMR of **1m**

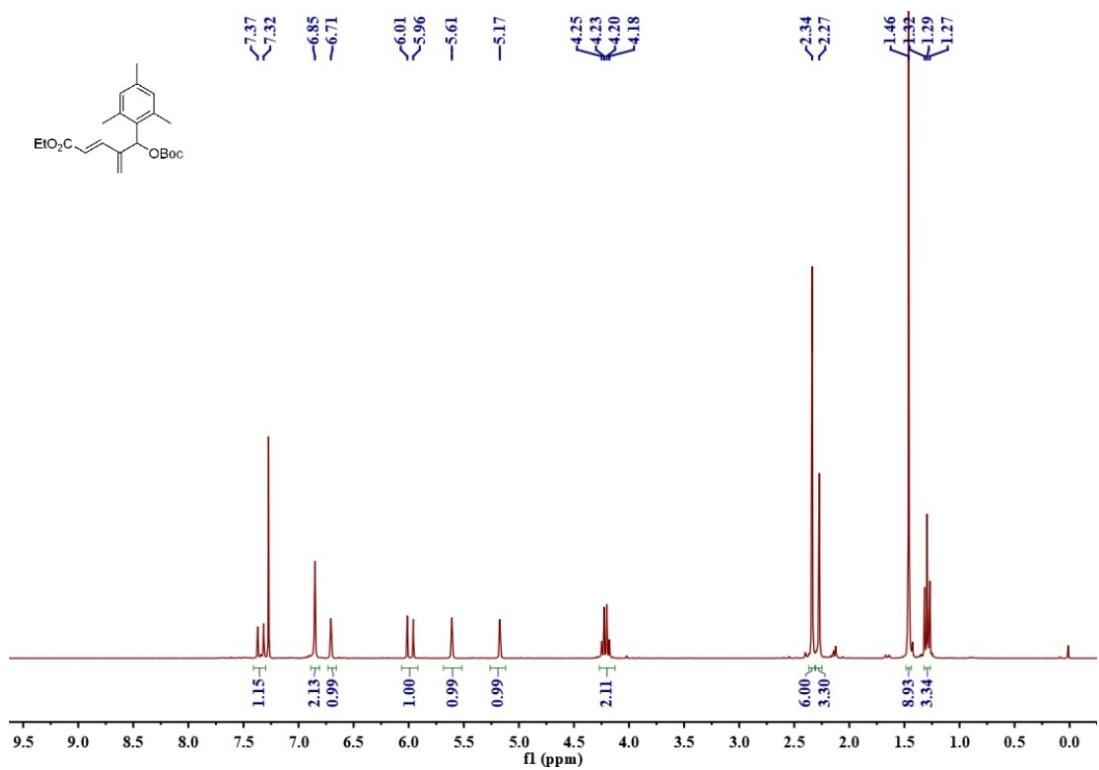

<sup>1</sup>H NMR (CDCl<sub>3</sub>, 300 MHz) NMR of **1n**



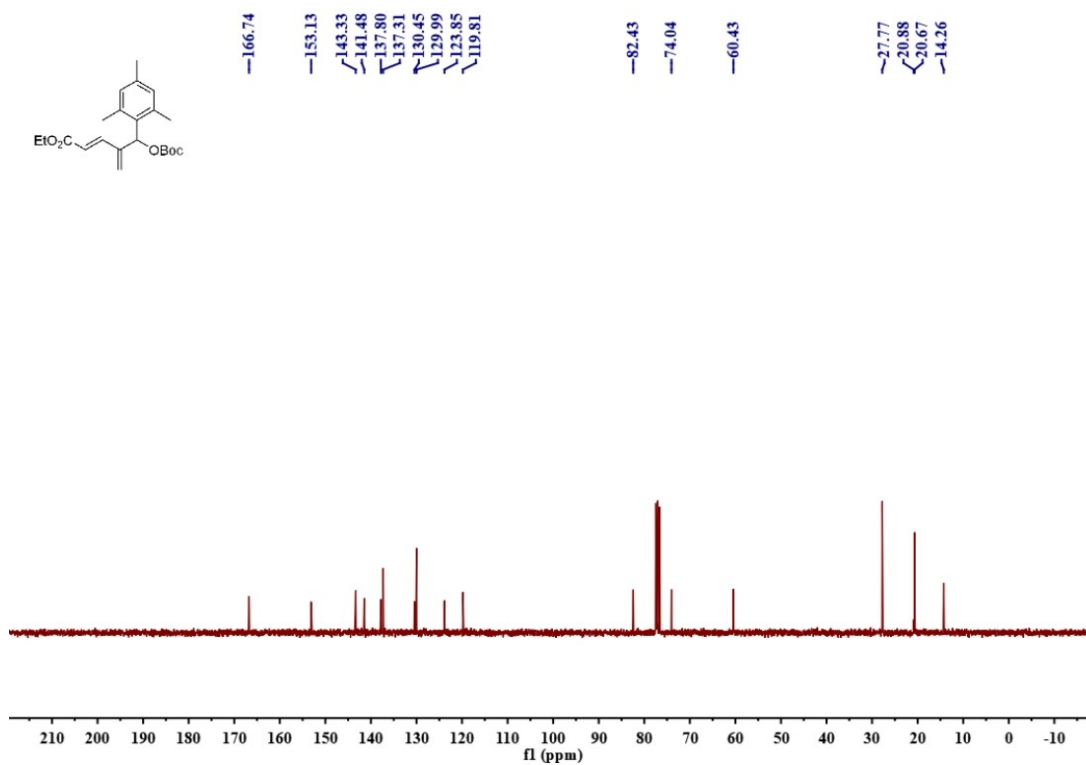

$^{13}\text{C}$  NMR (CDCl<sub>3</sub>, 75 MHz) NMR of **1n**

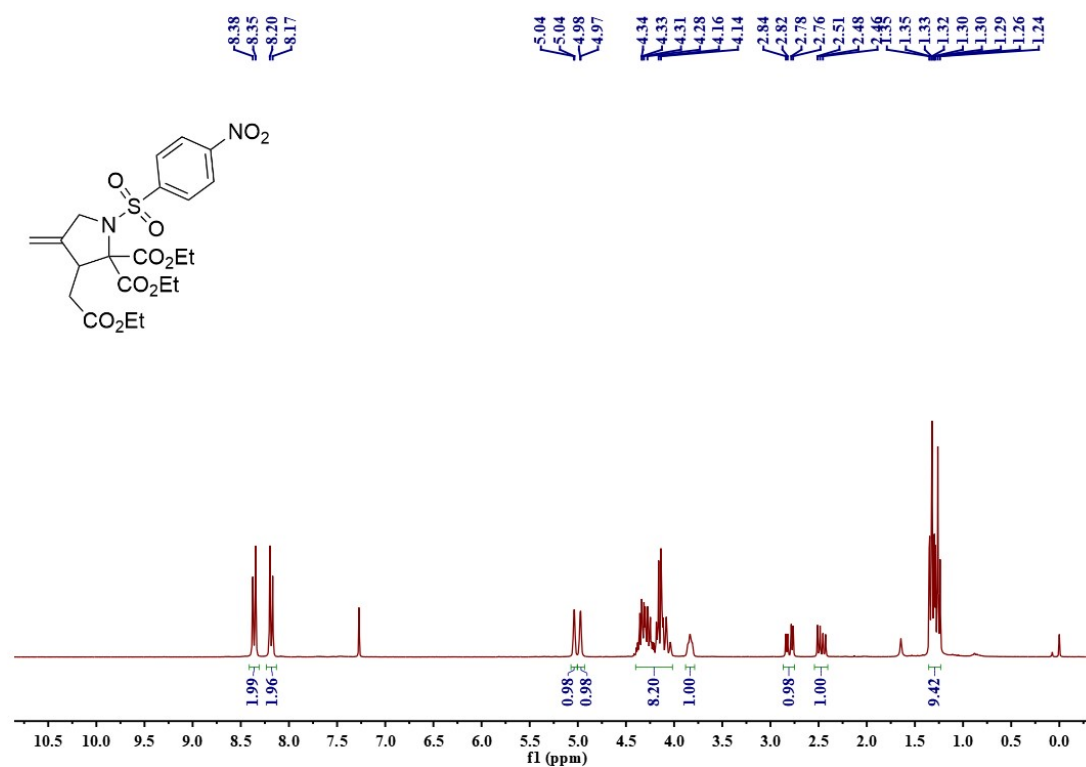

$^1\text{H}$  NMR (CDCl<sub>3</sub>, 300 MHz) NMR of **3aa**

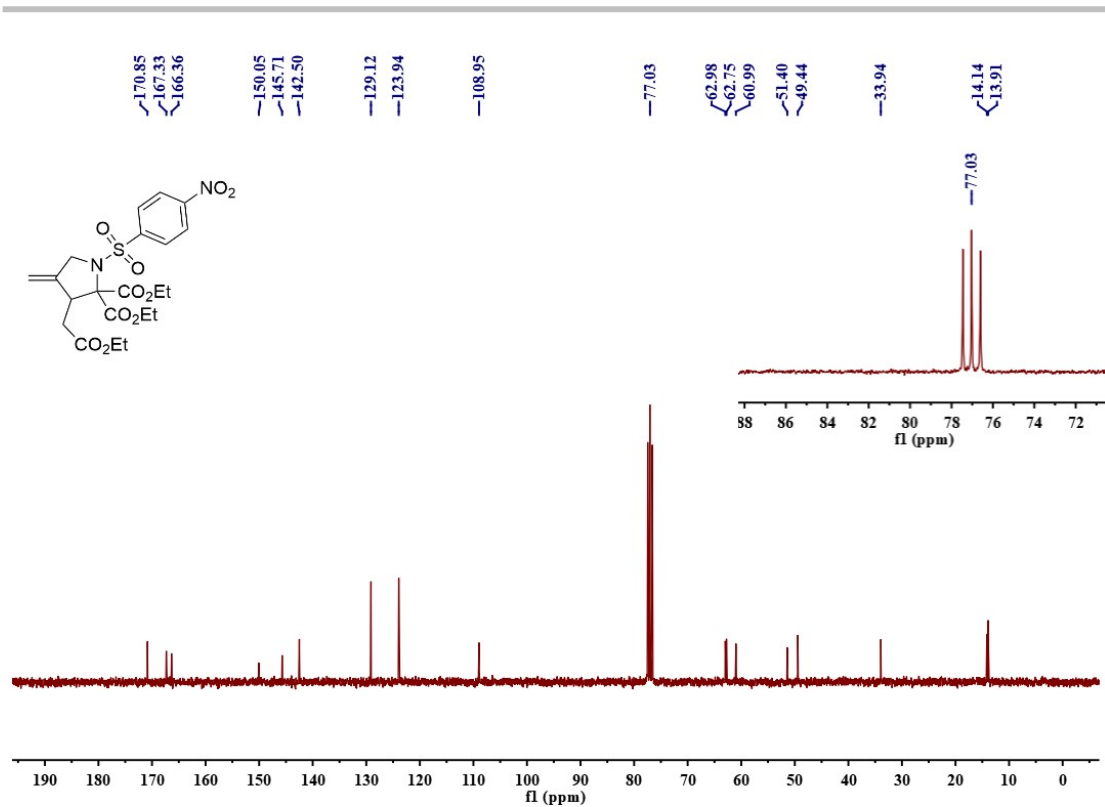

$^{13}\text{C}$  NMR (CDCl<sub>3</sub>, 75 MHz) NMR of **3aa**

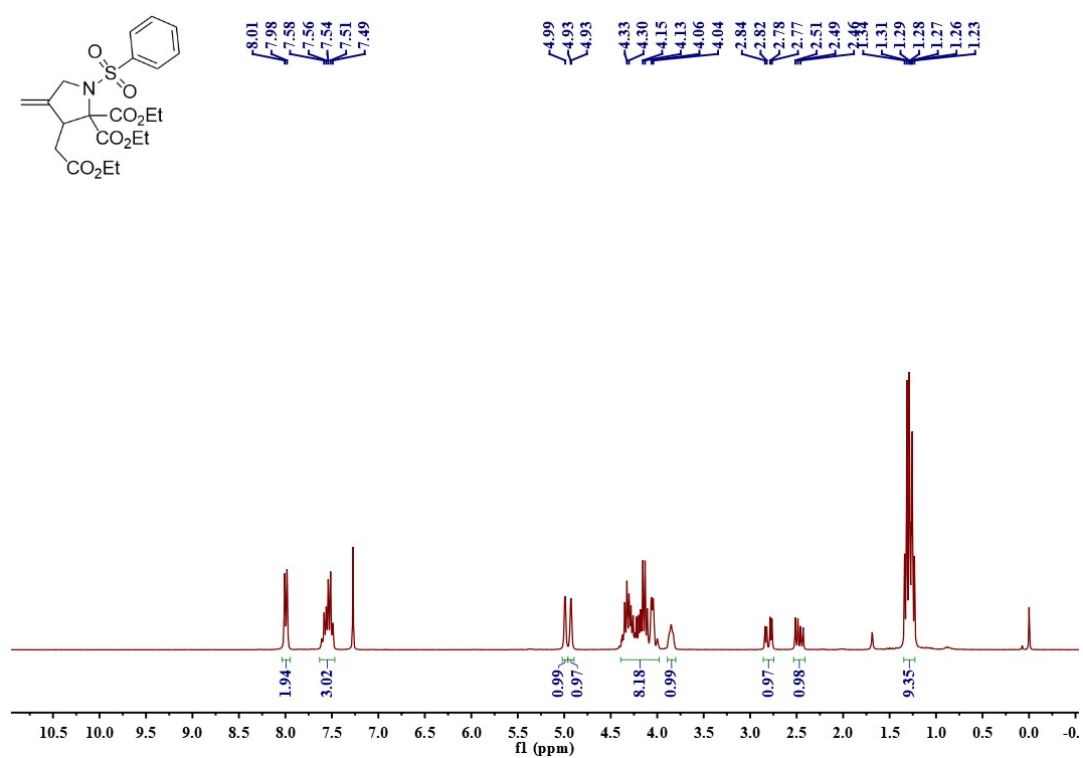

$^1\text{H}$  NMR (CDCl<sub>3</sub>, 300 MHz) NMR of **3ab**

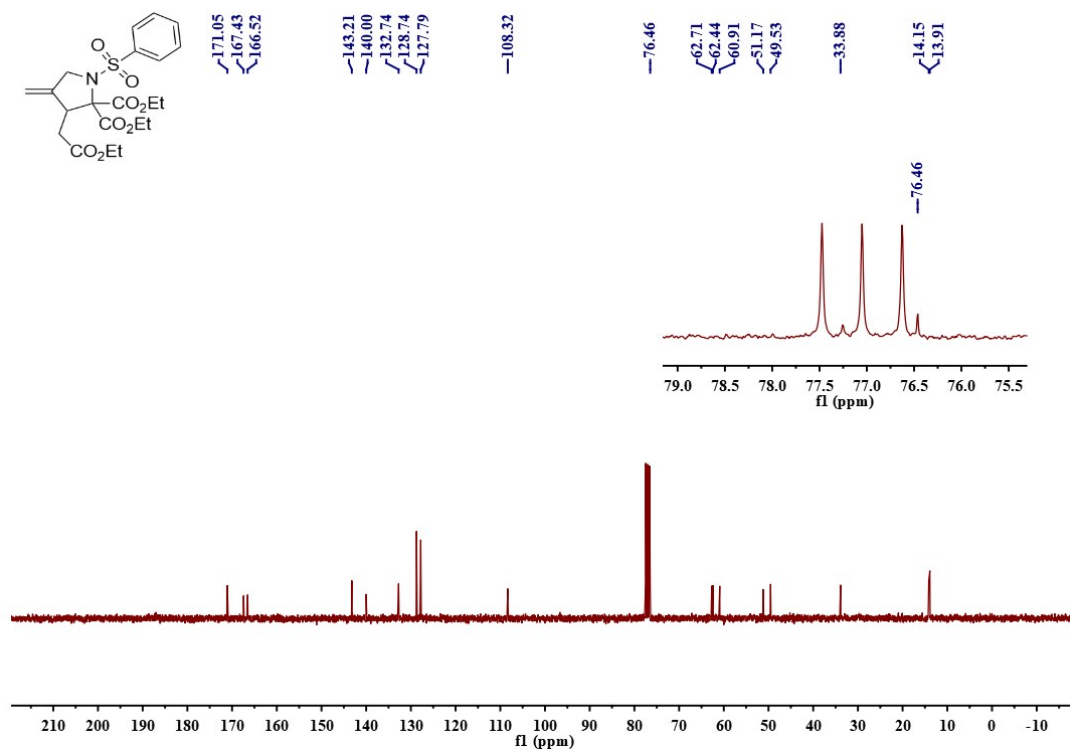

**<sup>13</sup>C NMR (CDCl<sub>3</sub>, 75 MHz) NMR of **3ab****

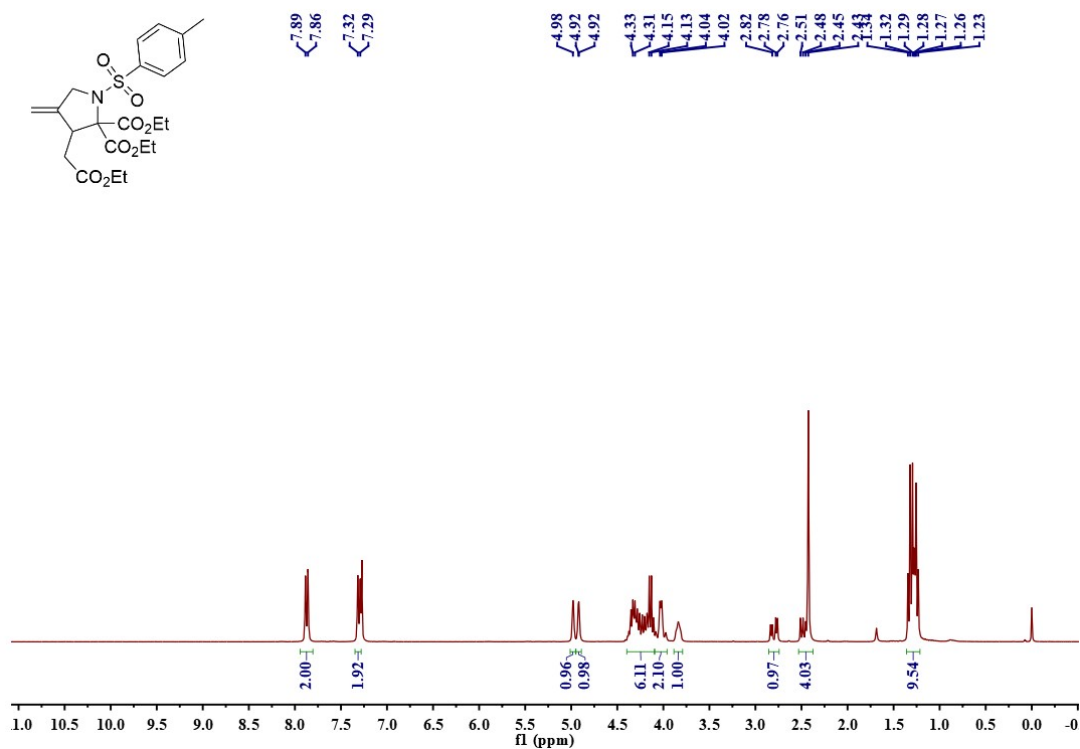

**<sup>1</sup>H NMR (CDCl<sub>3</sub>, 300 MHz) NMR of **3ac****

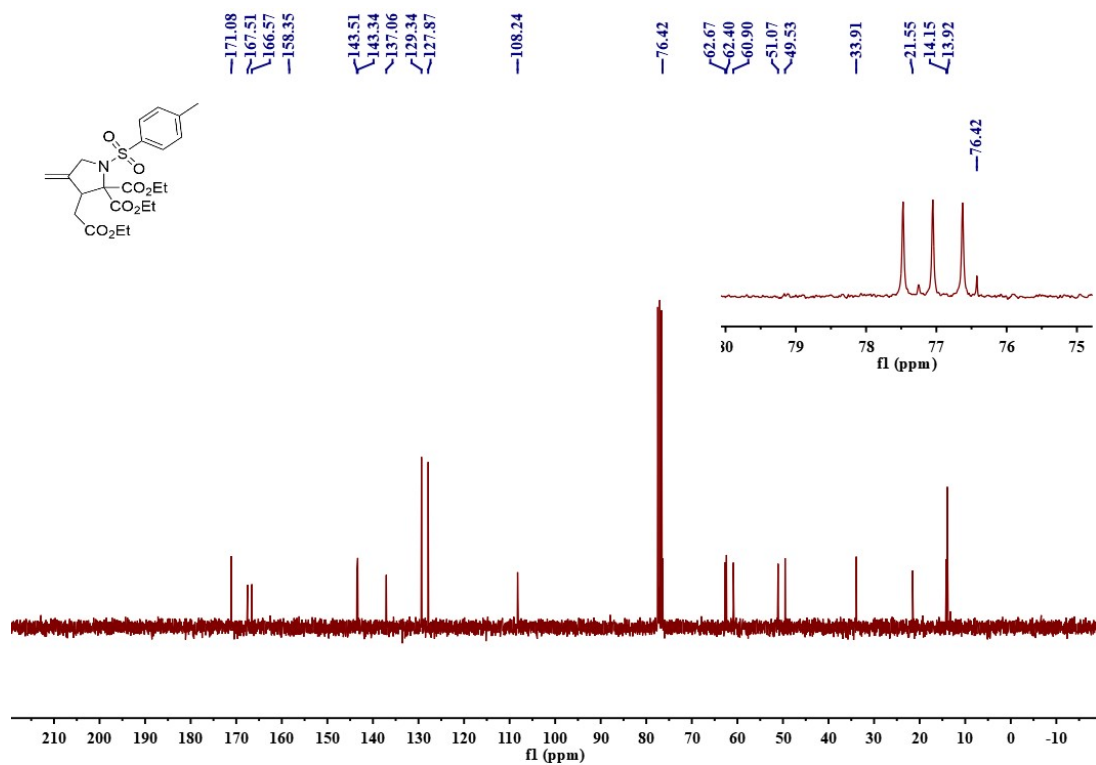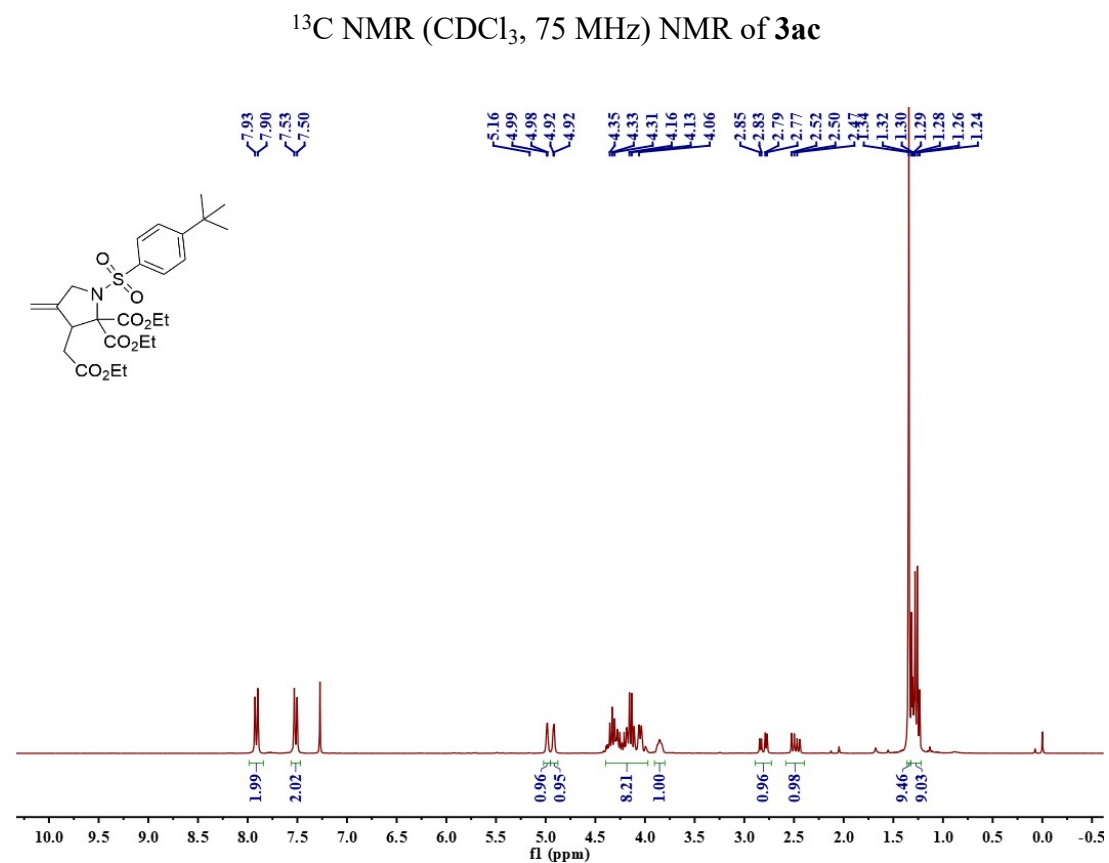

$^1\text{H}$  NMR (CDCl<sub>3</sub>, 300 MHz) NMR of **3ad**

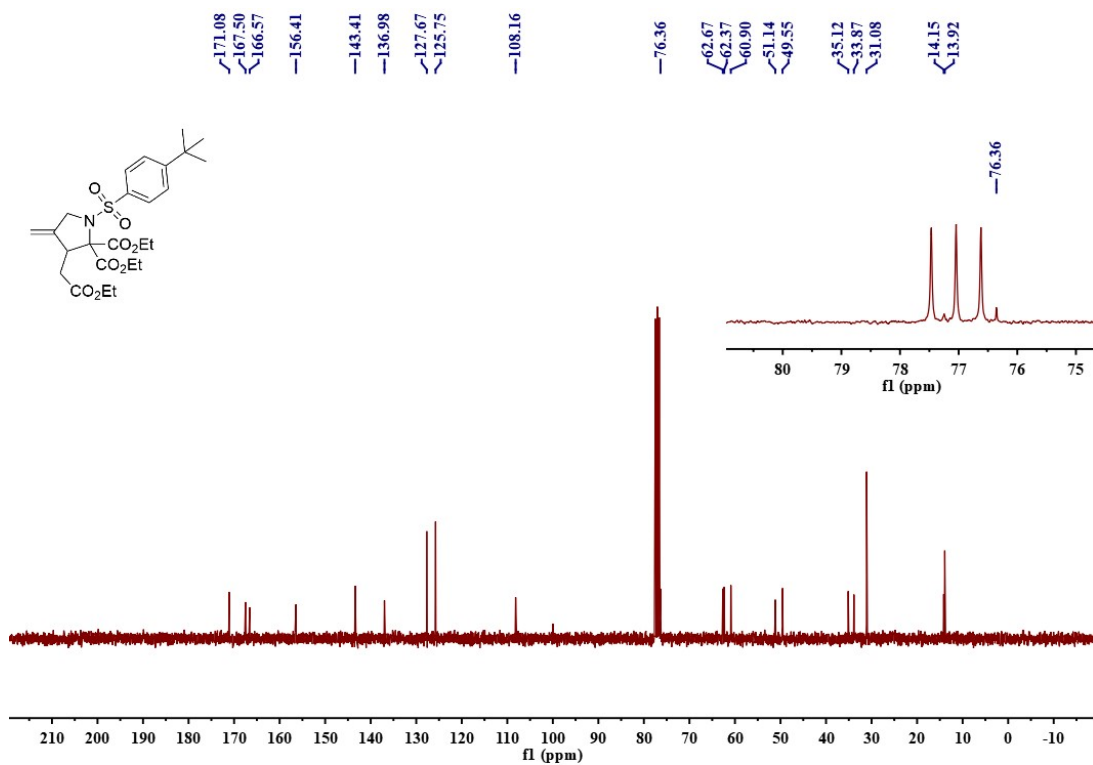

<sup>13</sup>C NMR (CDCl<sub>3</sub>, 75 MHz) NMR of **3ad**

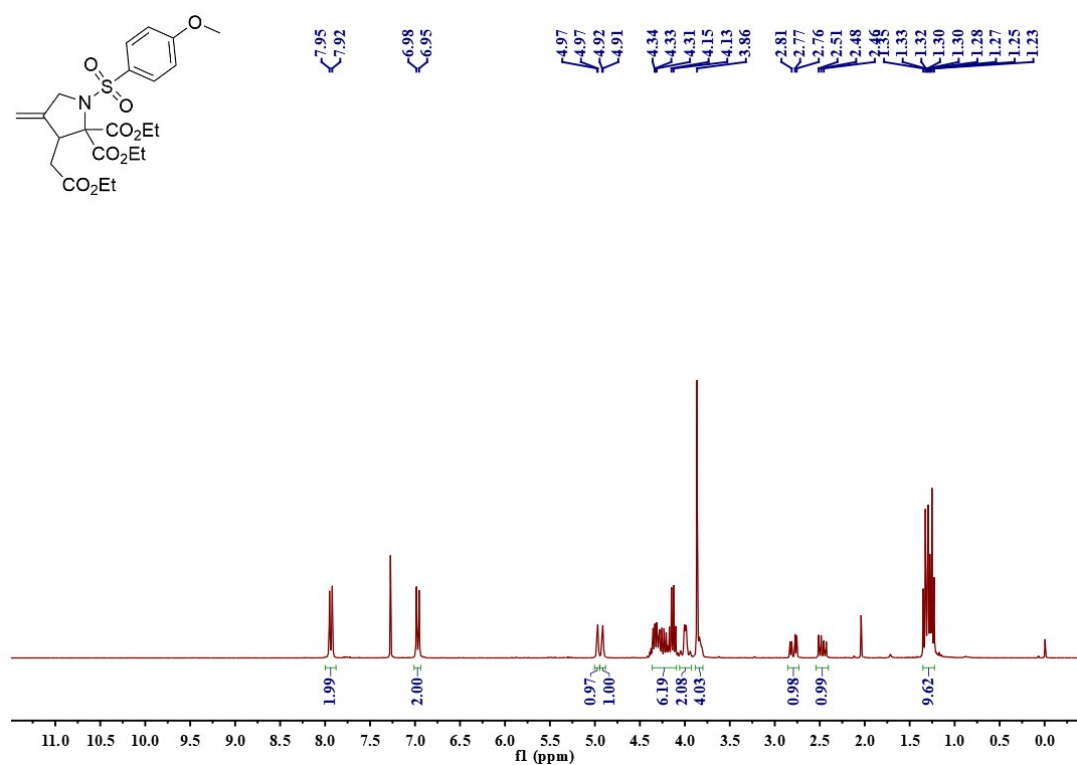

<sup>1</sup>H NMR (CDCl<sub>3</sub>, 300 MHz) NMR of **3ae**

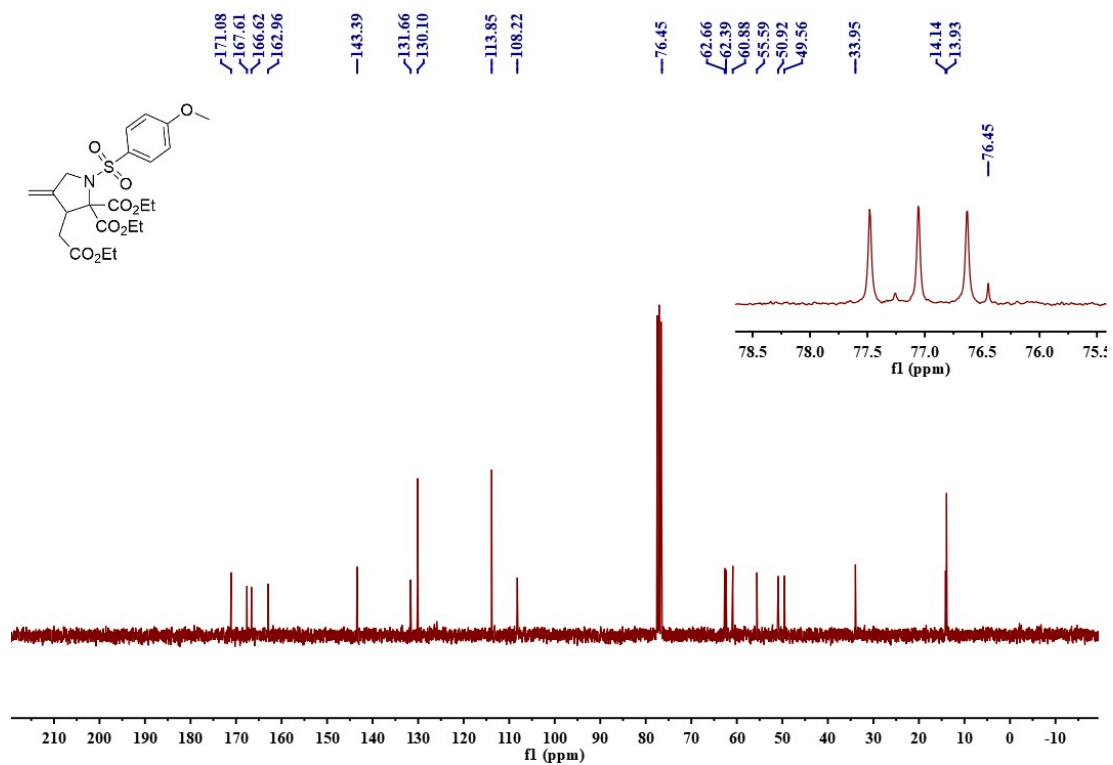

$^{13}\text{C}$  NMR (CDCl<sub>3</sub>, 75 MHz) NMR of **3ae**

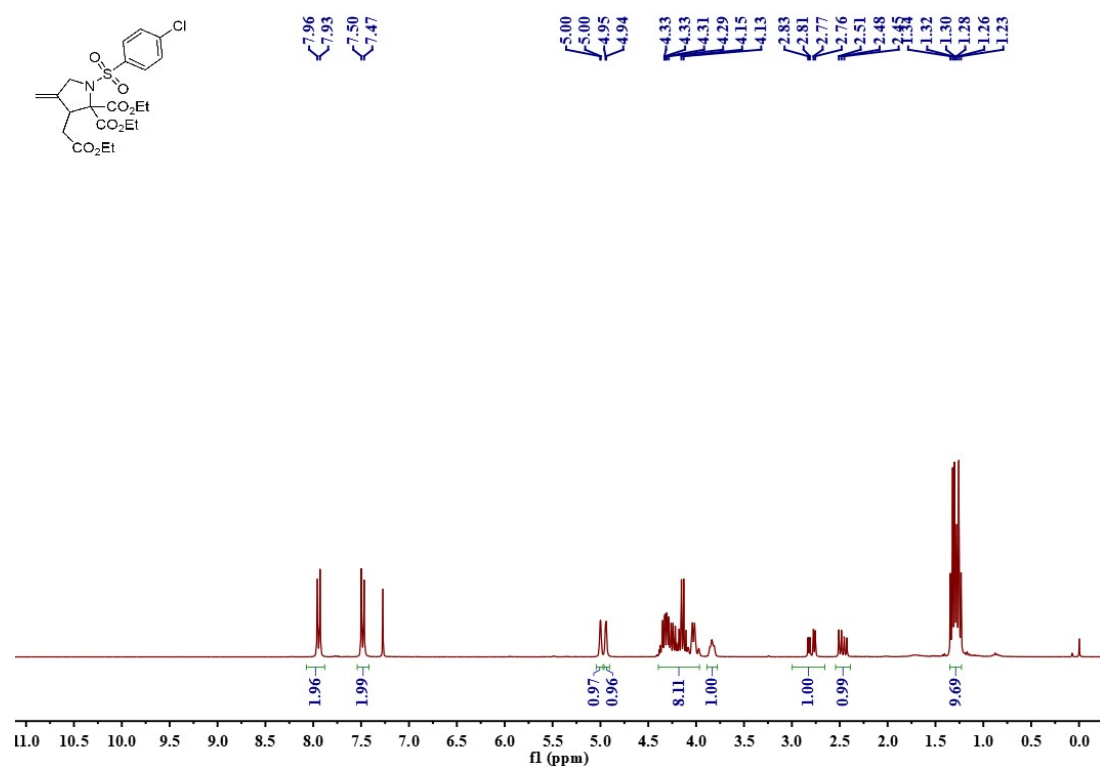

$^1\text{H}$  NMR (CDCl<sub>3</sub>, 300 MHz) NMR of **3af**

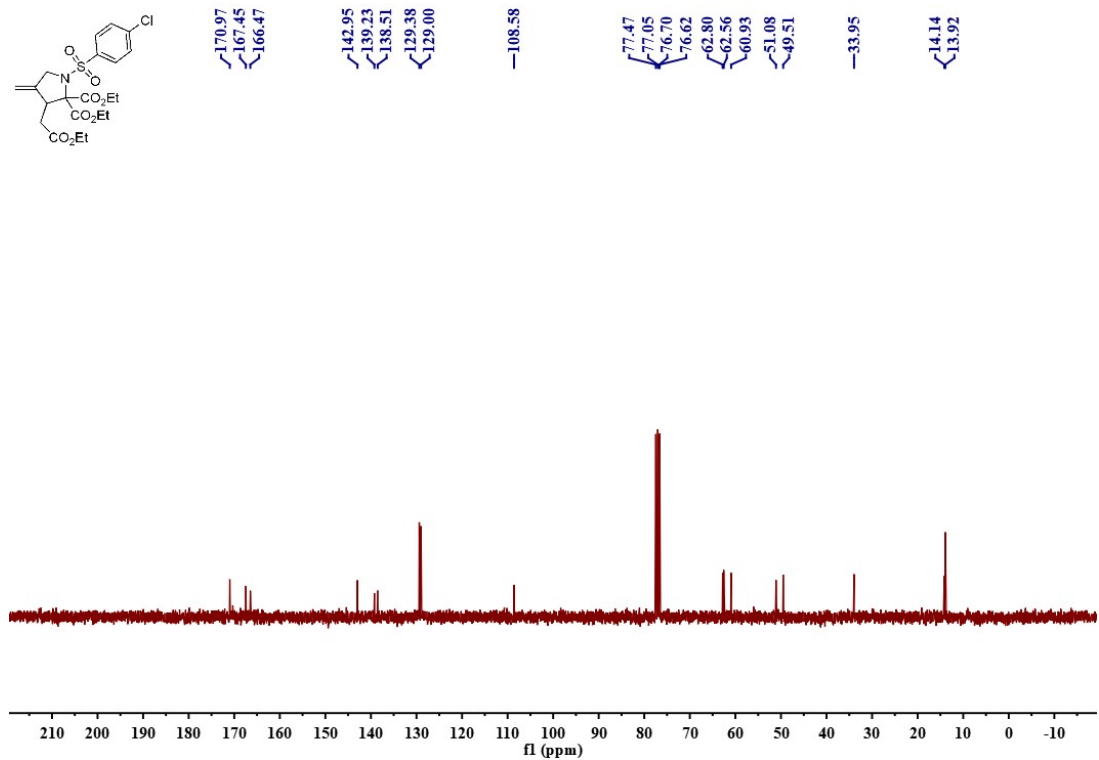

$^{13}\text{C}$  NMR (CDCl<sub>3</sub>, 75 MHz) NMR of **3af**

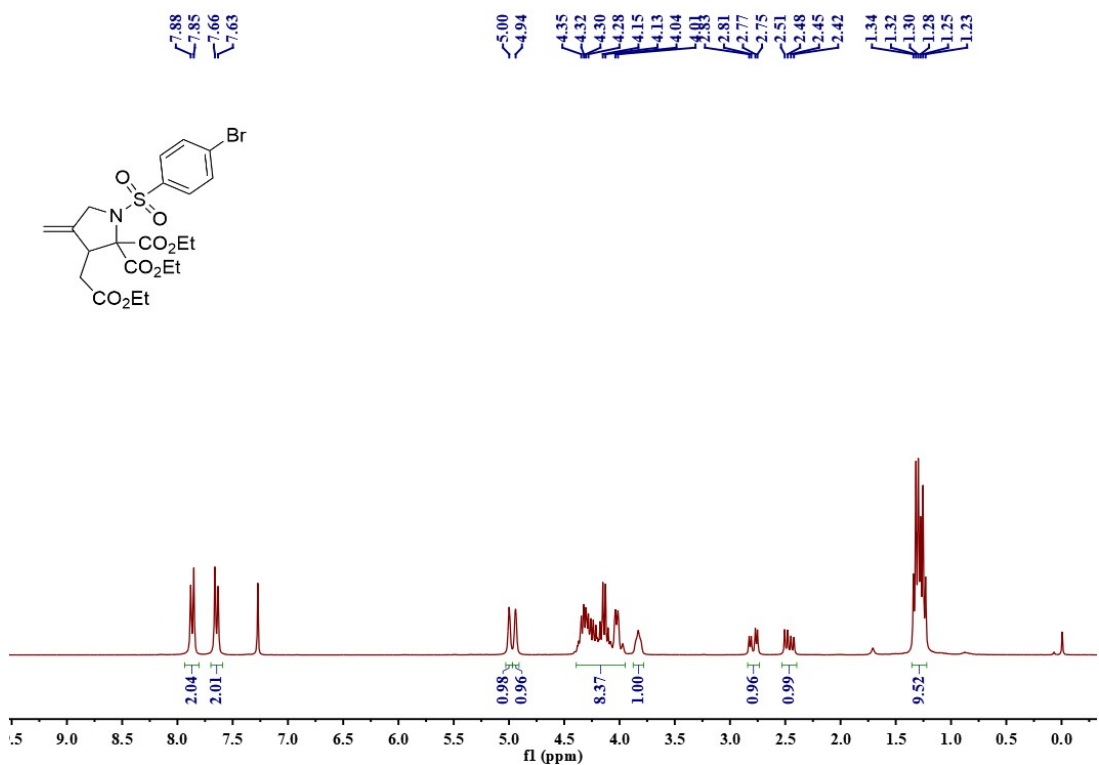

$^1\text{H}$  NMR (CDCl<sub>3</sub>, 300 MHz) NMR of **3ag**

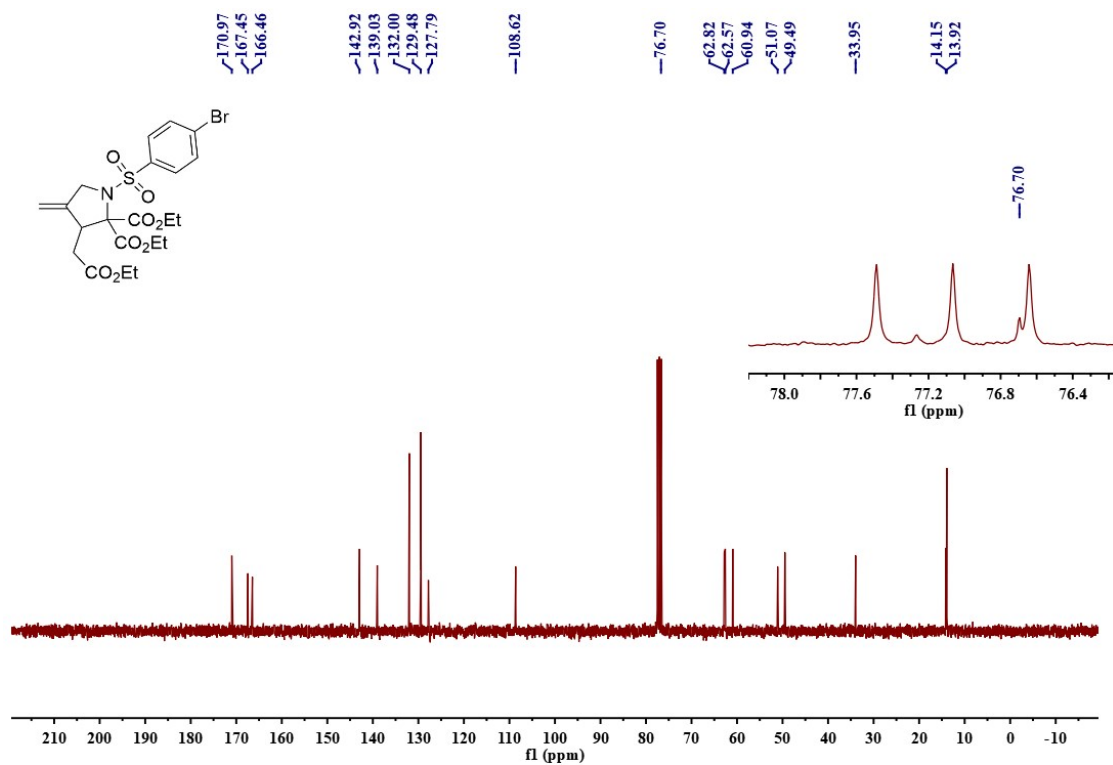

<sup>13</sup>C NMR (CDCl<sub>3</sub>, 75 MHz) NMR of **3ag**

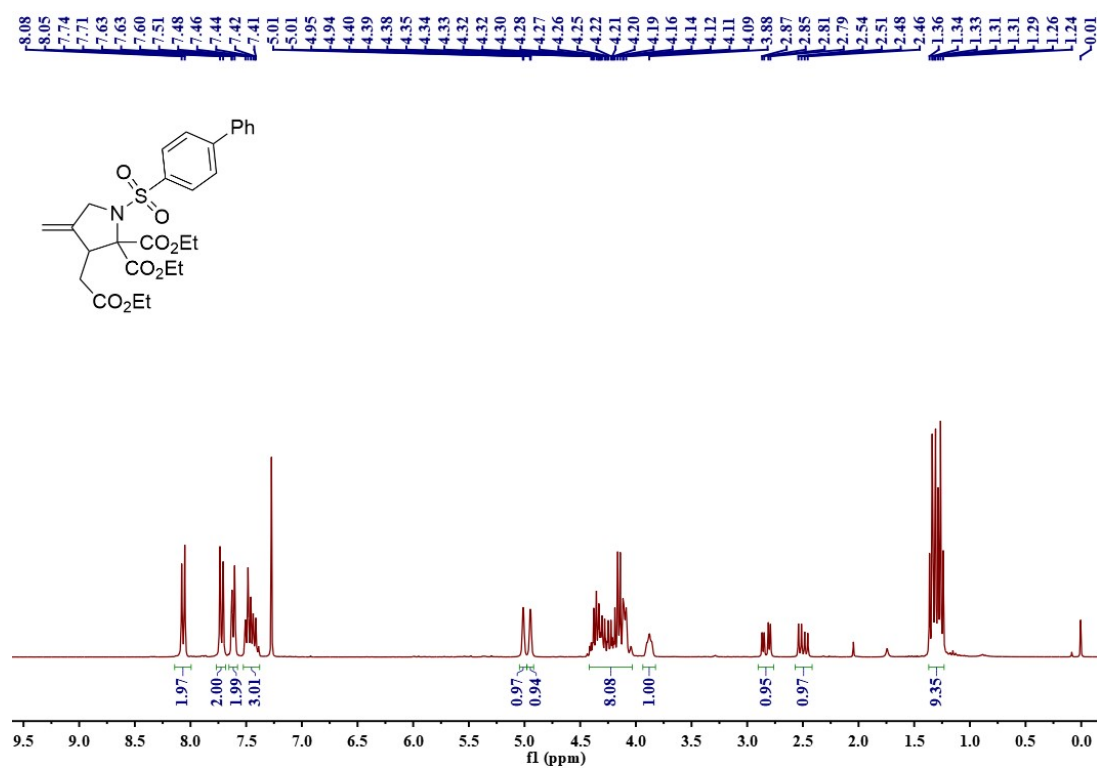

<sup>1</sup>H NMR (CDCl<sub>3</sub>, 300 MHz) NMR of **3ah**



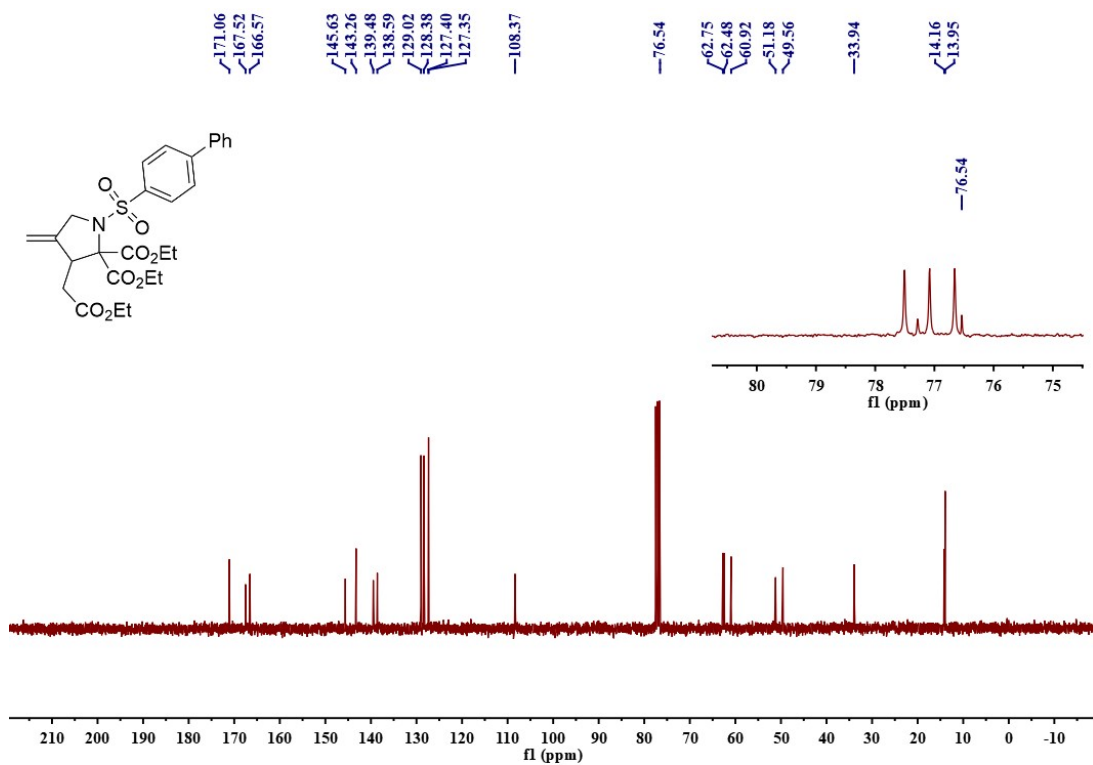

**<sup>13</sup>C NMR (CDCl<sub>3</sub>, 75 MHz) NMR of 3ah**

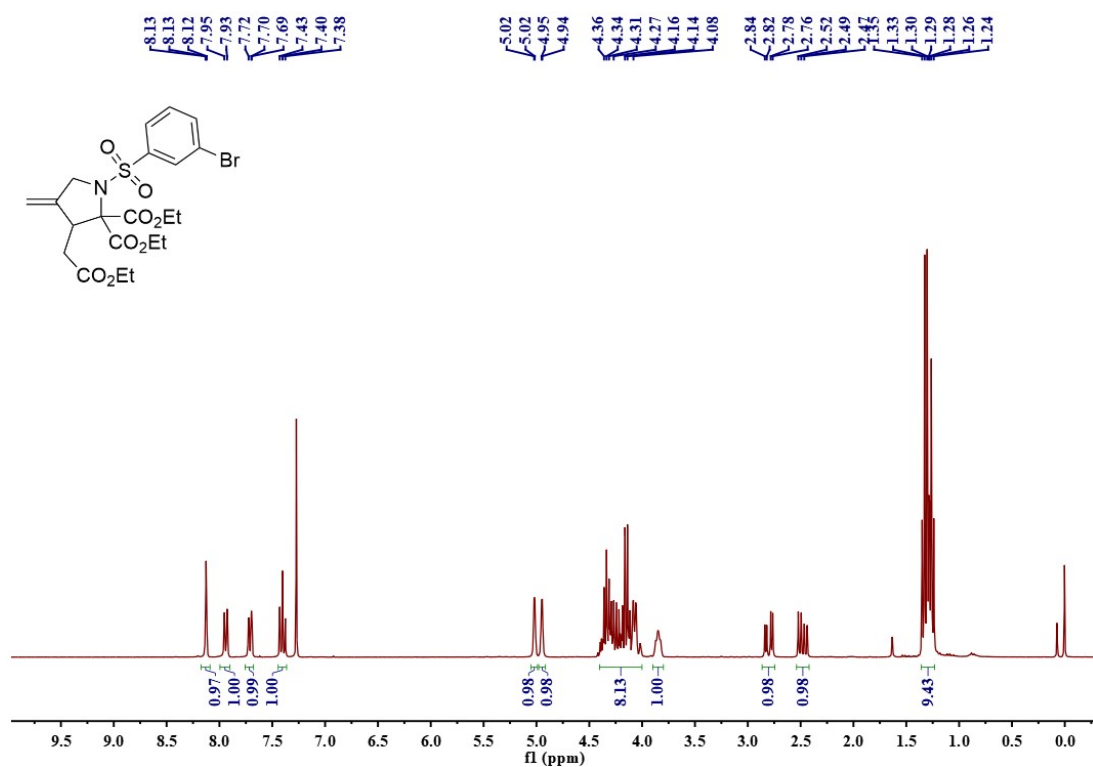

**<sup>1</sup>H NMR (CDCl<sub>3</sub>, 300 MHz) NMR of 3ai**

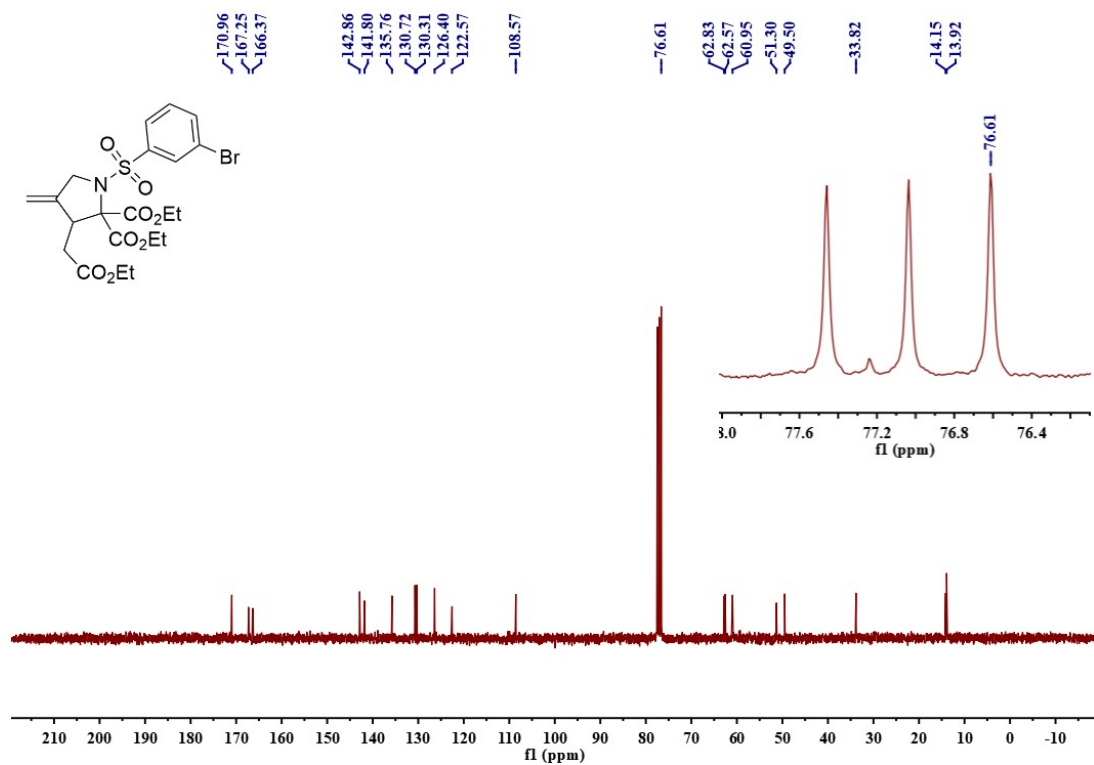

$^{13}\text{C}$  NMR (CDCl<sub>3</sub>, 75 MHz) NMR of **3ai**

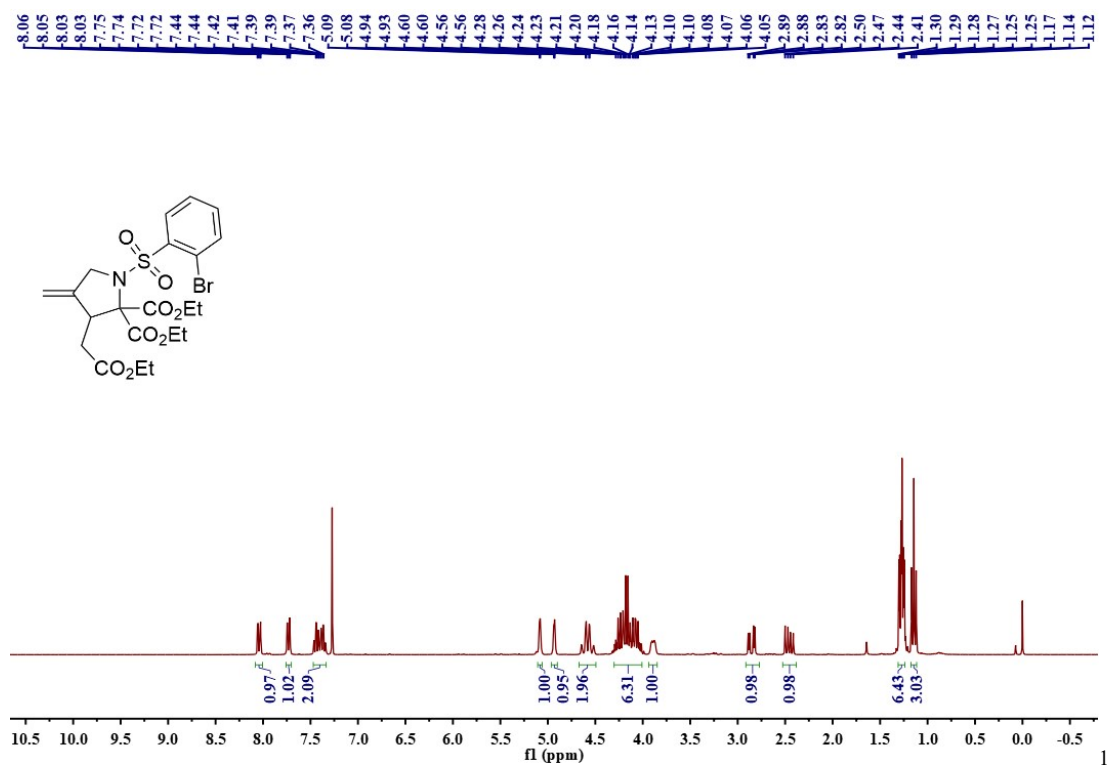

$^1\text{H}$  NMR (CDCl<sub>3</sub>, 300 MHz) NMR of **3aj**

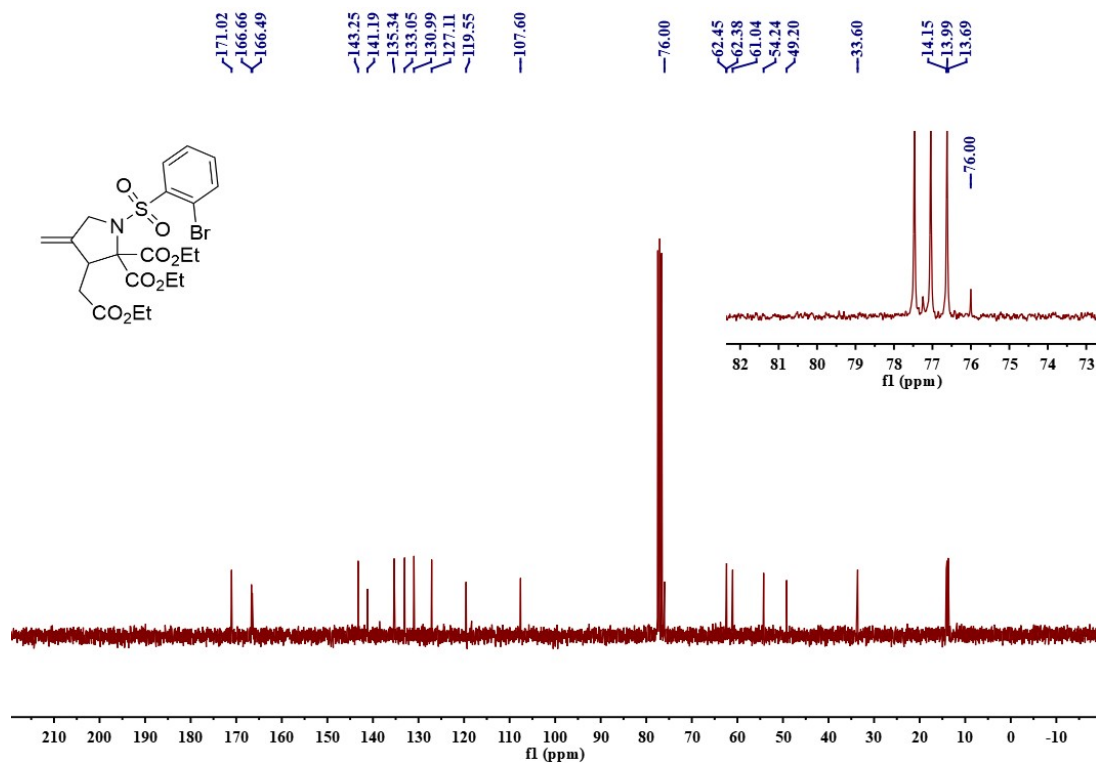

<sup>13</sup>C NMR (CDCl<sub>3</sub>, 75 MHz) NMR of **3aj**

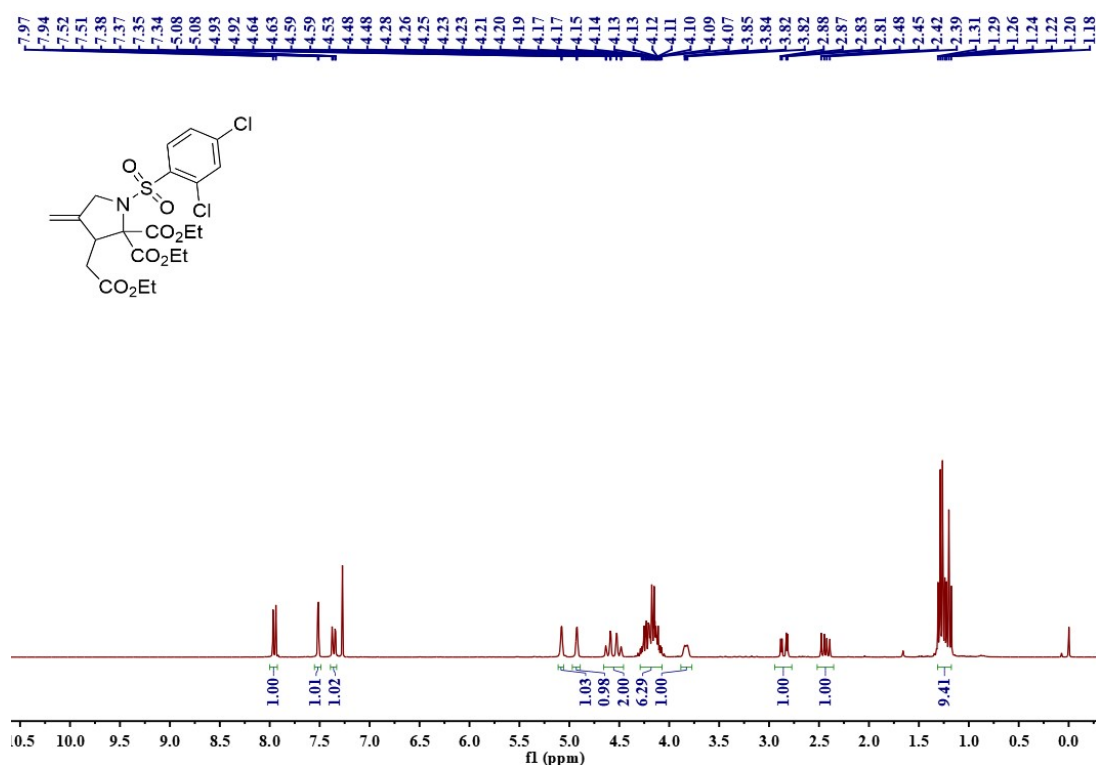

<sup>1</sup>H NMR (CDCl<sub>3</sub>, 300 MHz) NMR of **3ak**

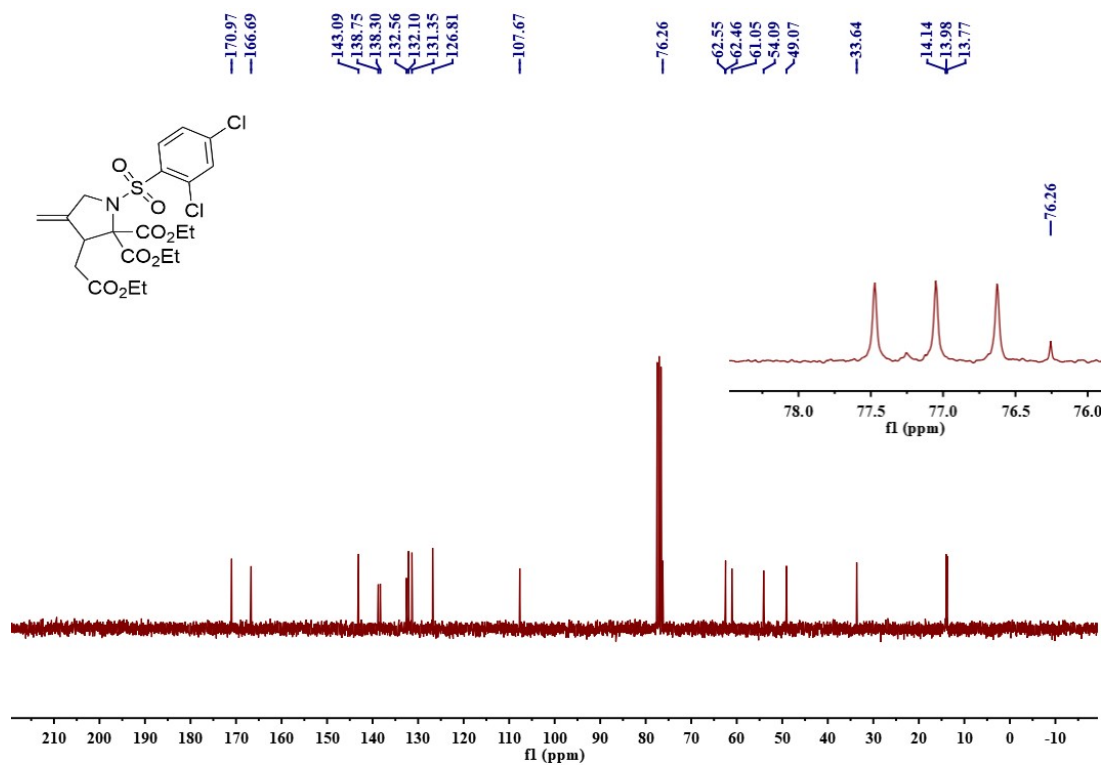

$^{13}\text{C}$  NMR (CDCl<sub>3</sub>, 75 MHz) NMR of **3ak**

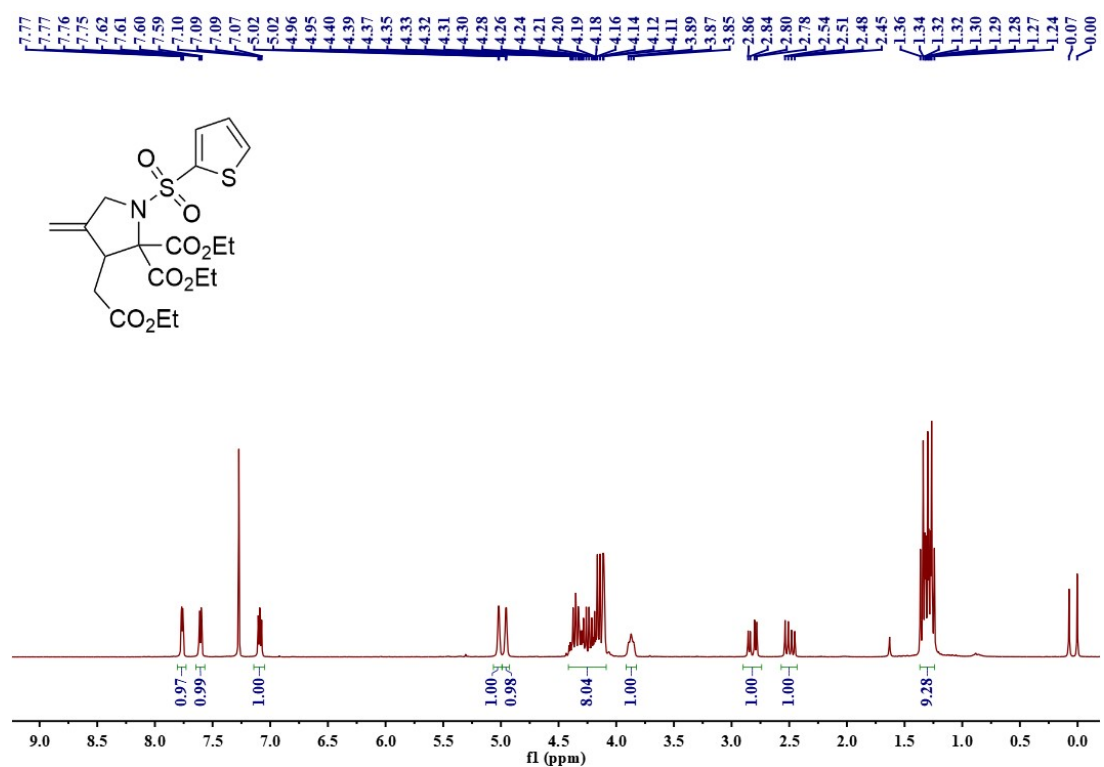

$^1\text{H}$  NMR (CDCl<sub>3</sub>, 300 MHz) NMR of **3al**

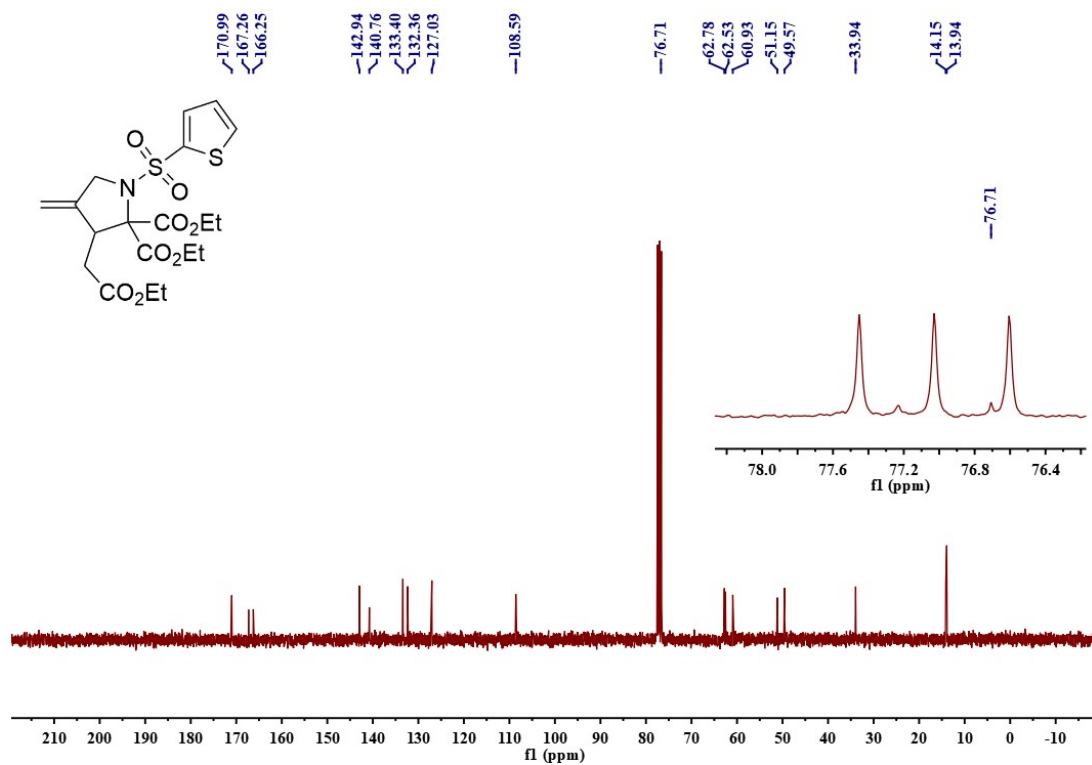

**<sup>13</sup>C NMR (CDCl<sub>3</sub>, 75 MHz) NMR of 3al**

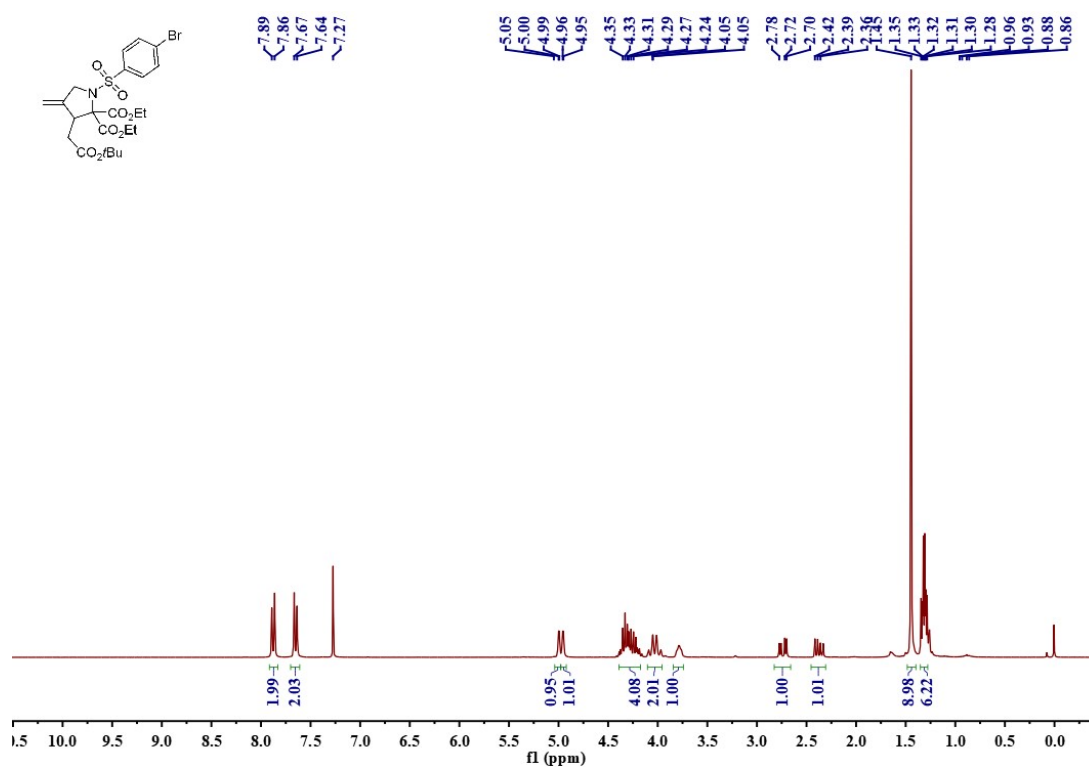

**<sup>1</sup>H NMR (CDCl<sub>3</sub>, 300 MHz) NMR of 3bg**

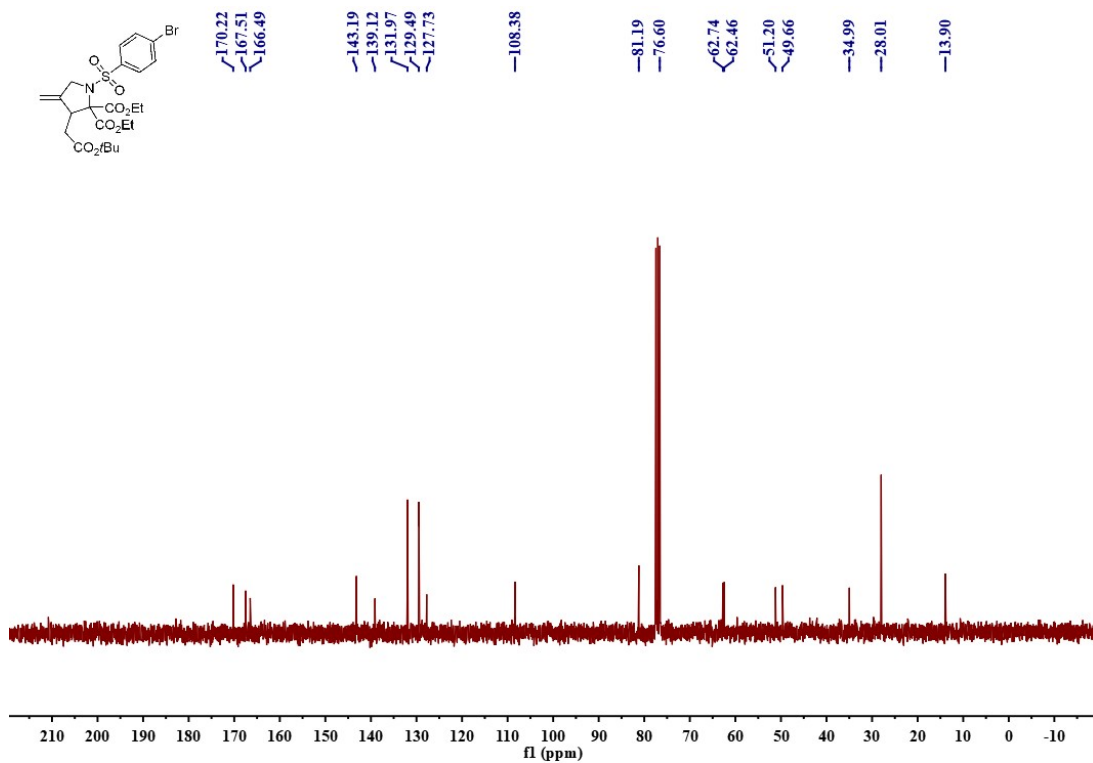

$^{13}\text{C}$  NMR (CDCl<sub>3</sub>, 75 MHz) NMR of **3bg**

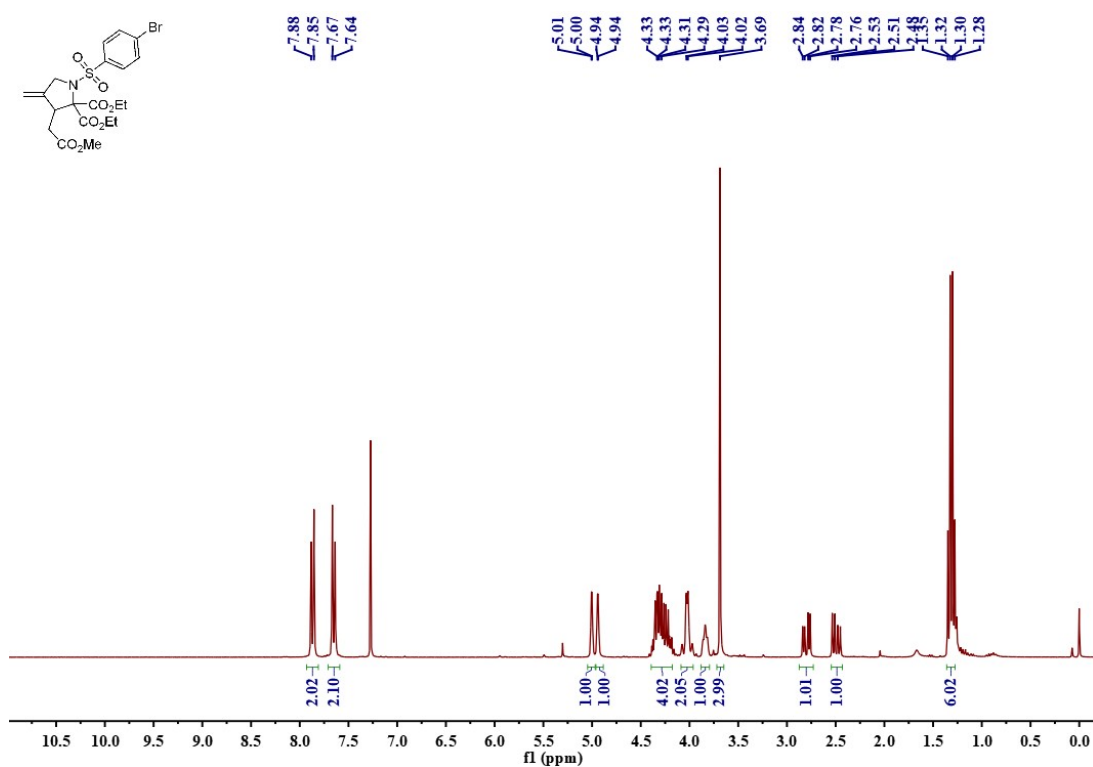

$^1\text{H}$  NMR (CDCl<sub>3</sub>, 300 MHz) NMR of **3cg**

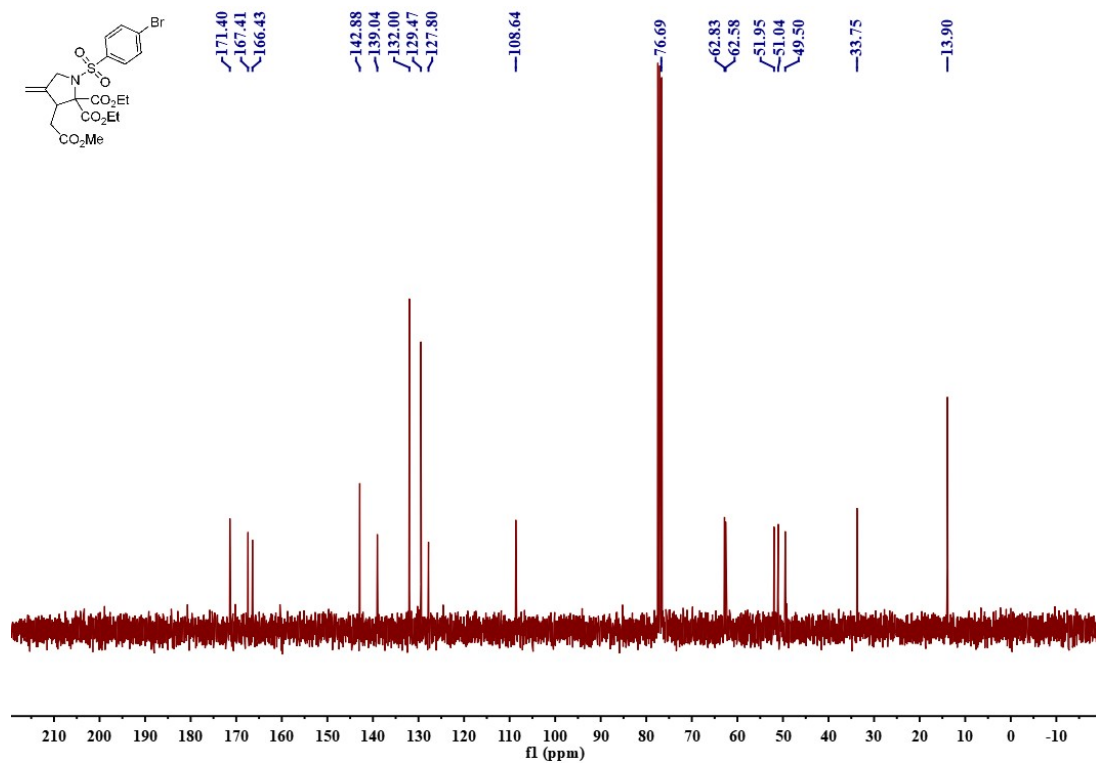

<sup>13</sup>C NMR (CDCl<sub>3</sub>, 75 MHz) NMR of 3cg

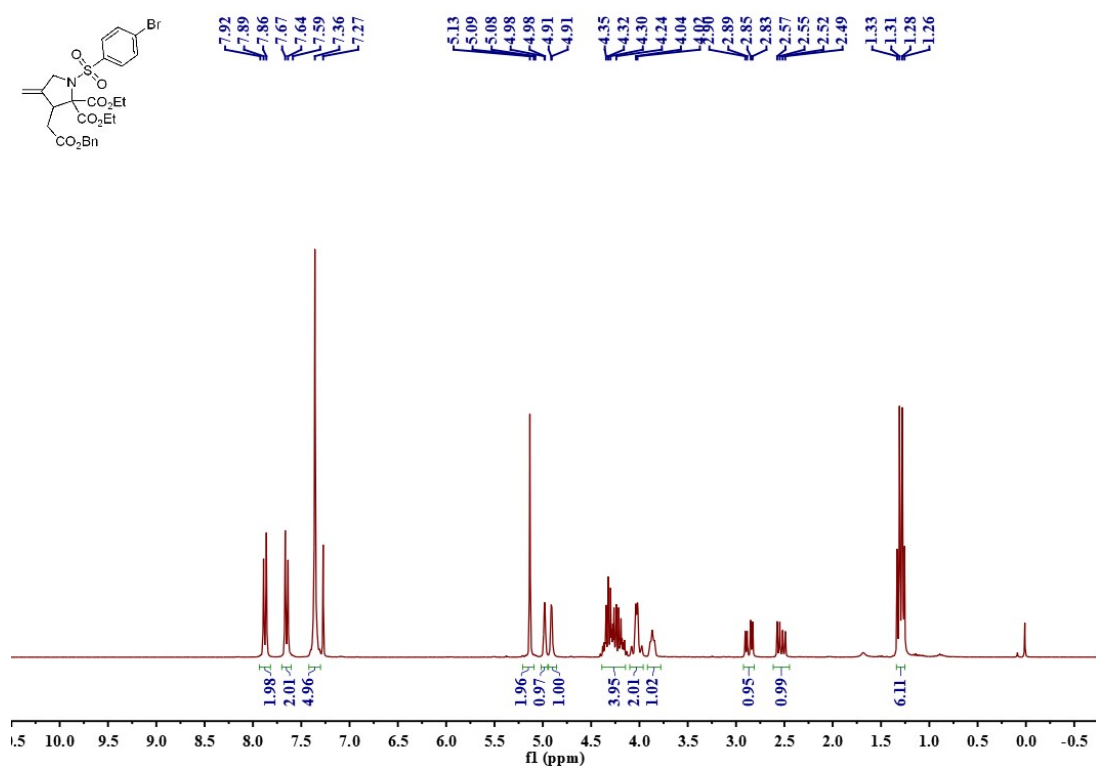

<sup>1</sup>H NMR (CDCl<sub>3</sub>, 300 MHz) NMR of 3dg

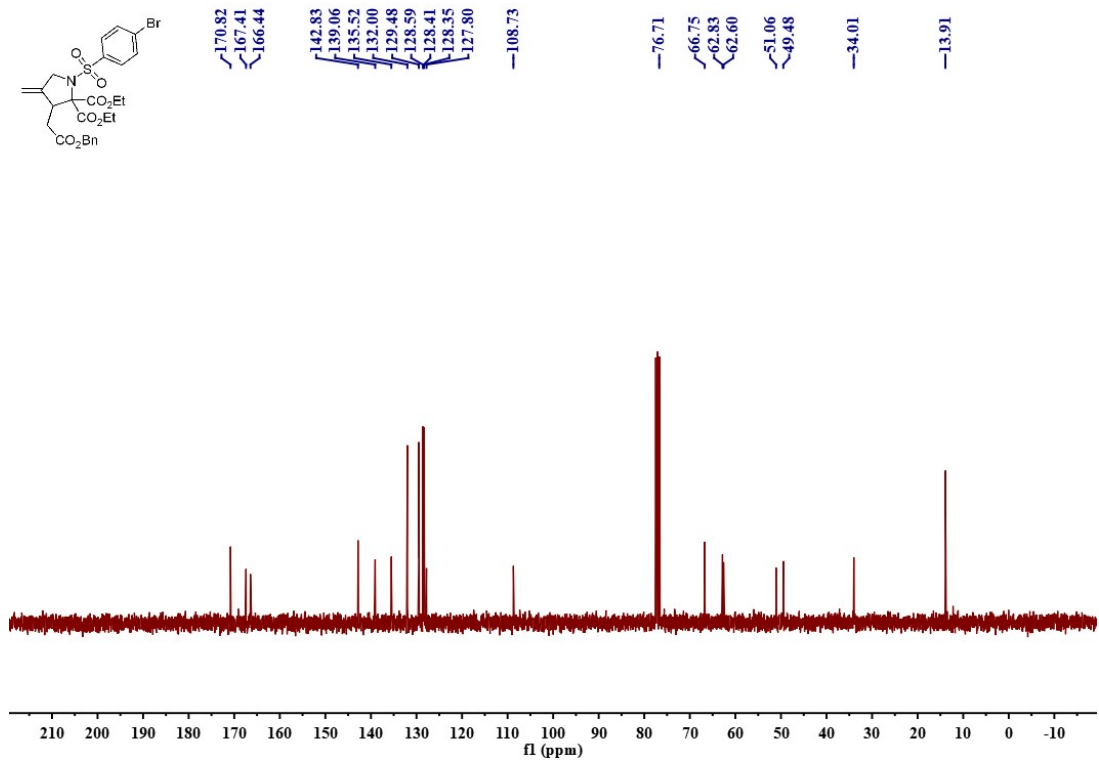

$^{13}\text{C}$  NMR (CDCl<sub>3</sub>, 75 MHz) NMR of **3dg**

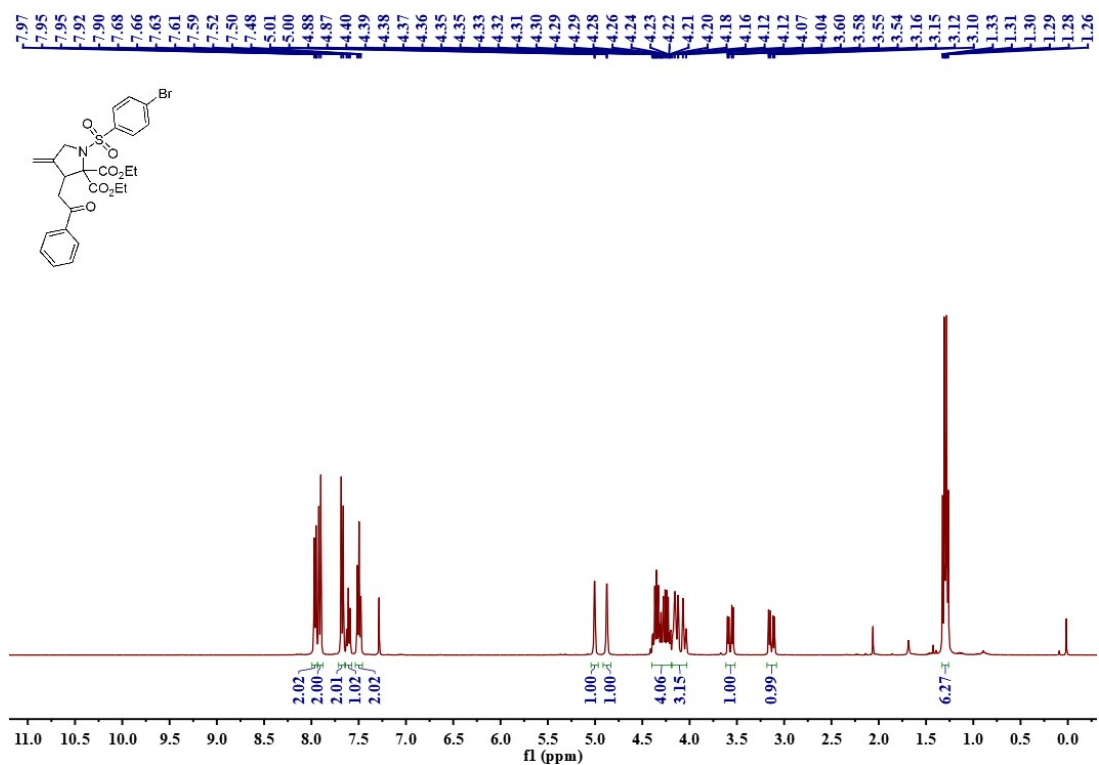

$^1\text{H}$  NMR (CDCl<sub>3</sub>, 400MHz) NMR of **3eg**



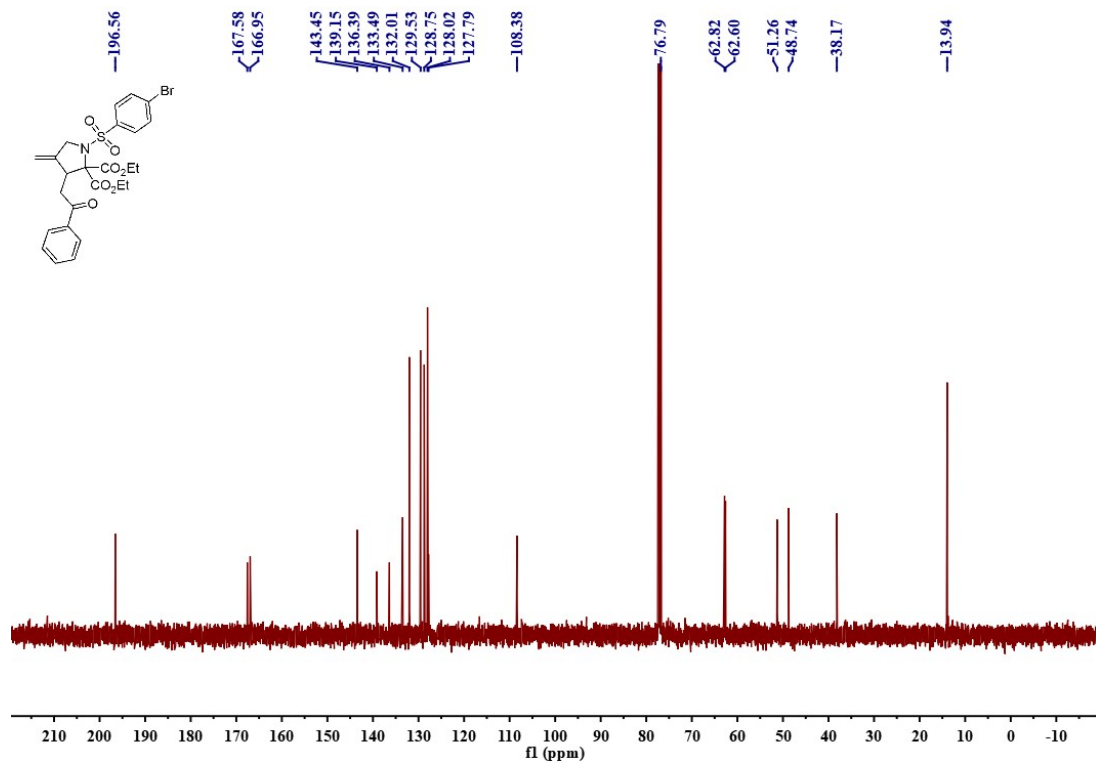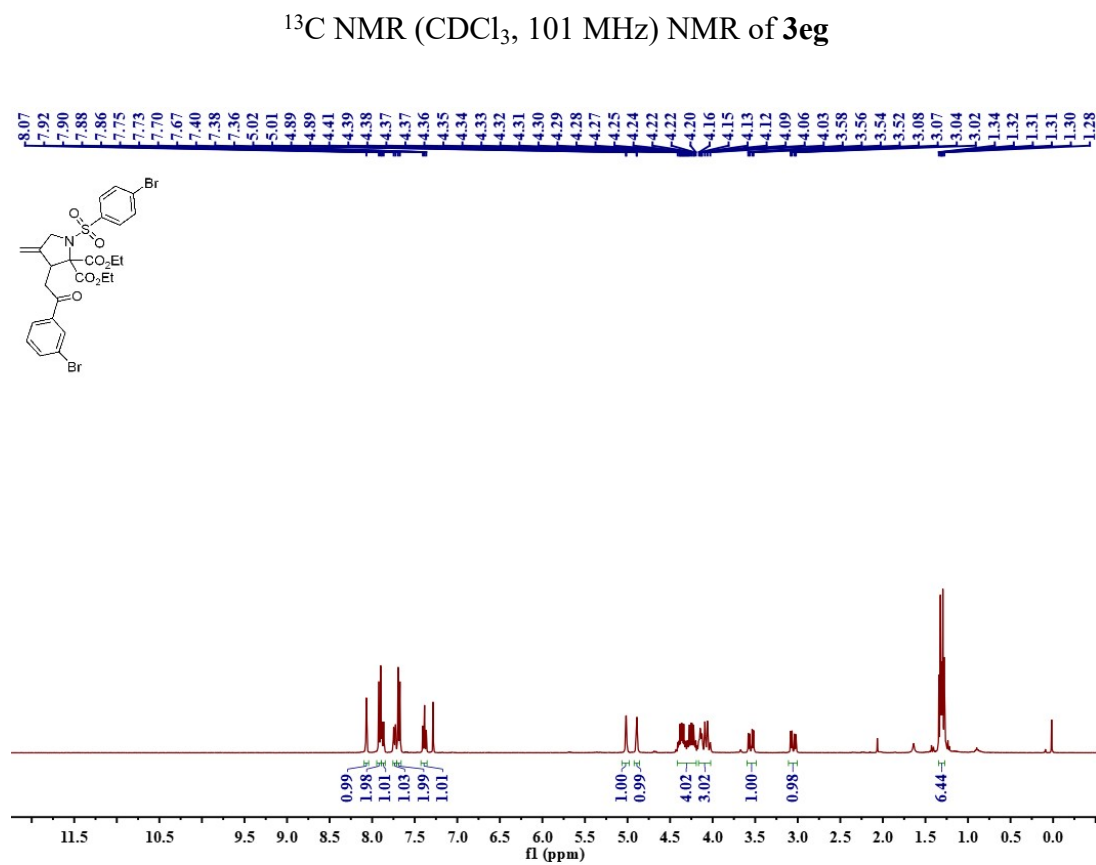

$^1\text{H}$  NMR (CDCl<sub>3</sub>, 400 MHz) NMR of **3fg**

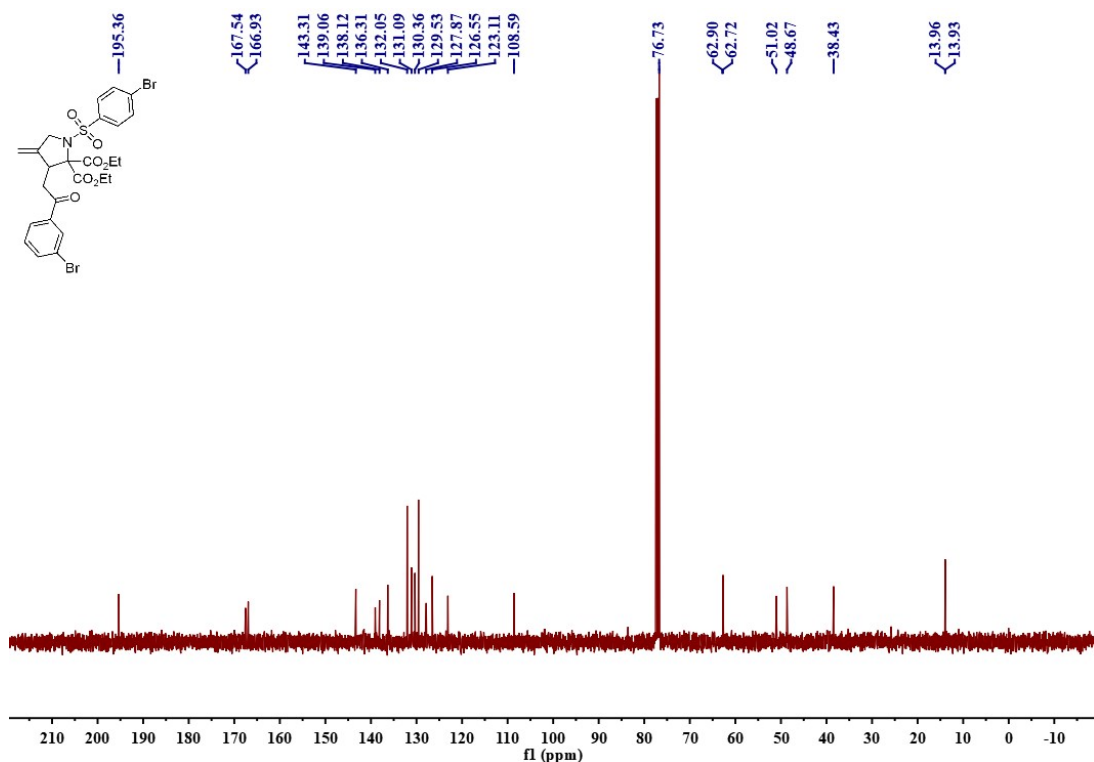

<sup>13</sup>C NMR (CDCl<sub>3</sub>, 101 MHz) NMR of **3fg**

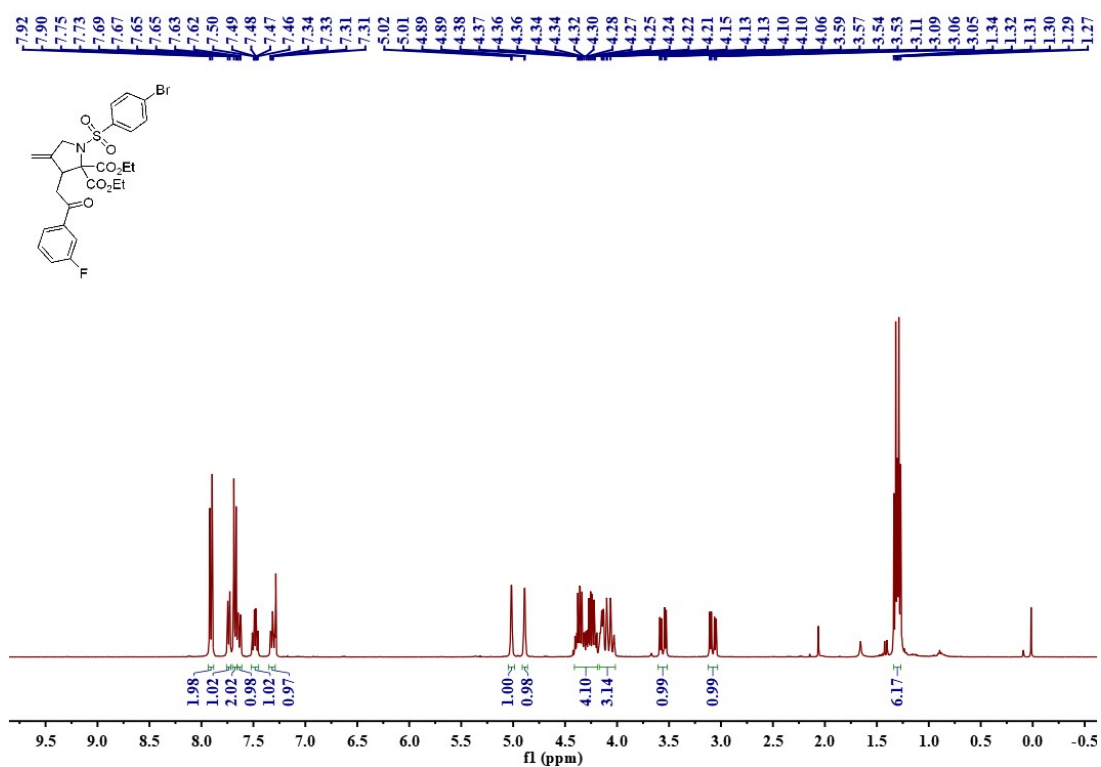

<sup>1</sup>H NMR (CDCl<sub>3</sub>, 400 MHz) NMR of **3gg**

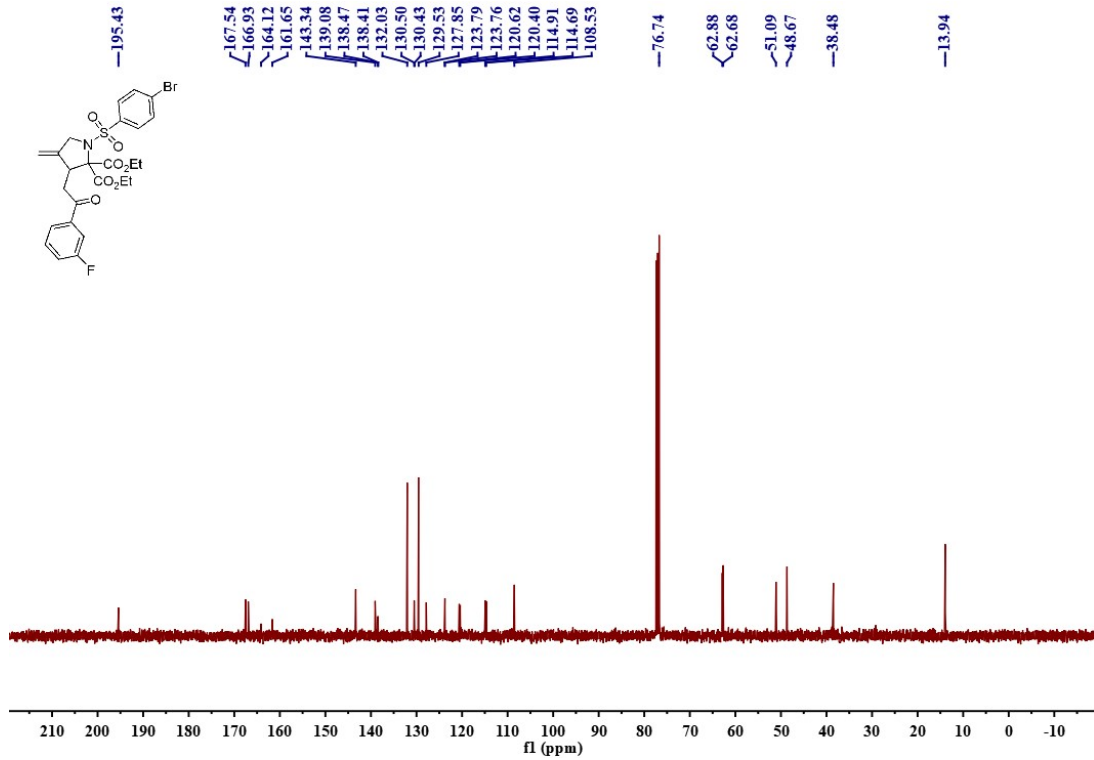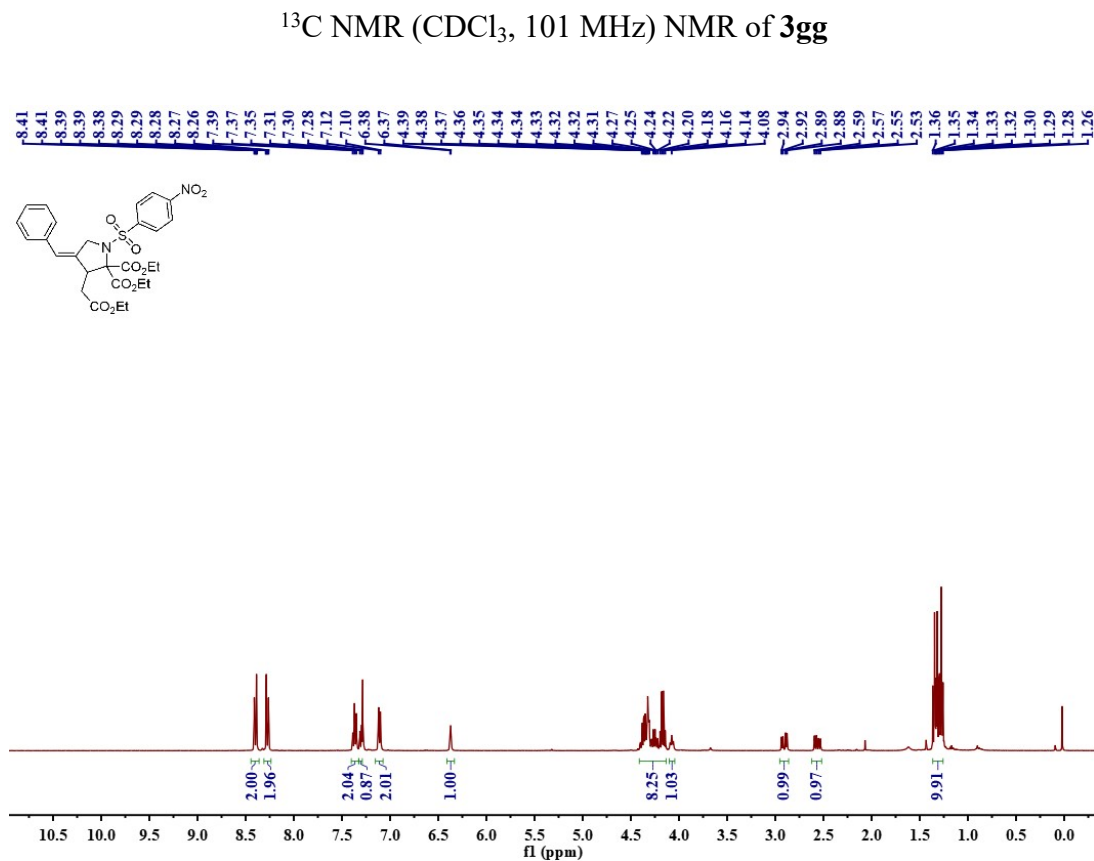

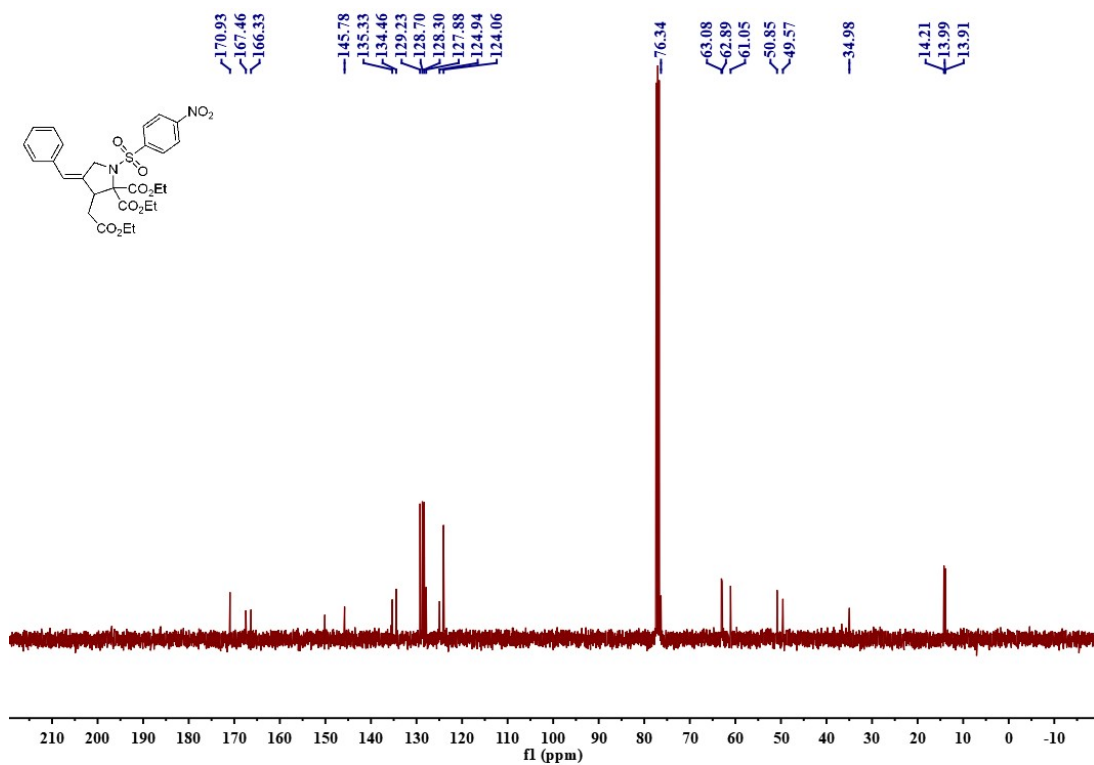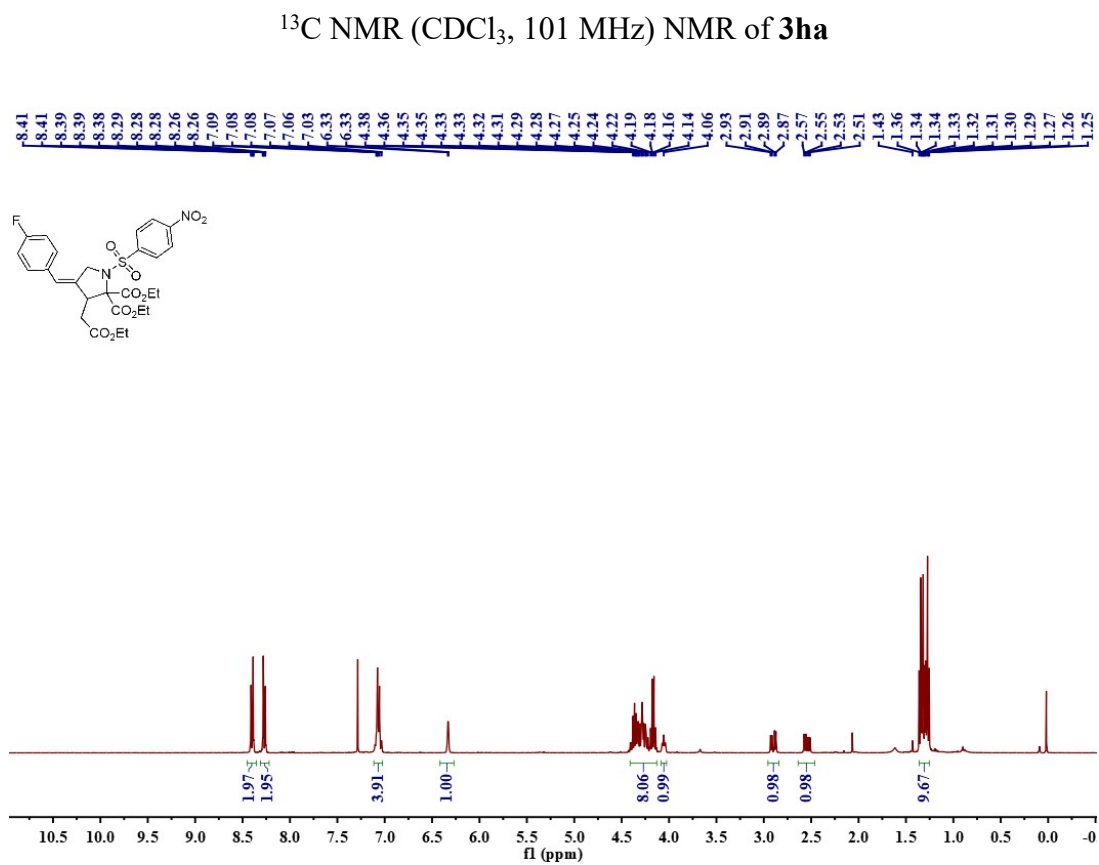

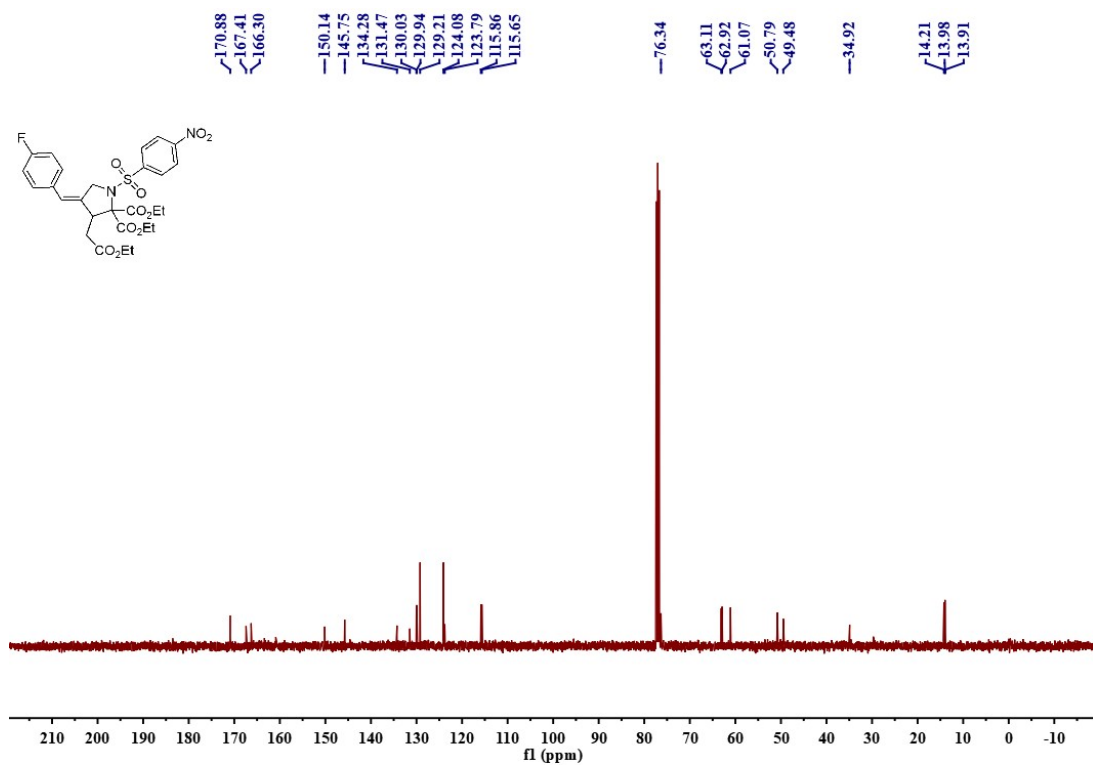

<sup>13</sup>C NMR (CDCl<sub>3</sub>, 101 MHz) NMR of **3ia**

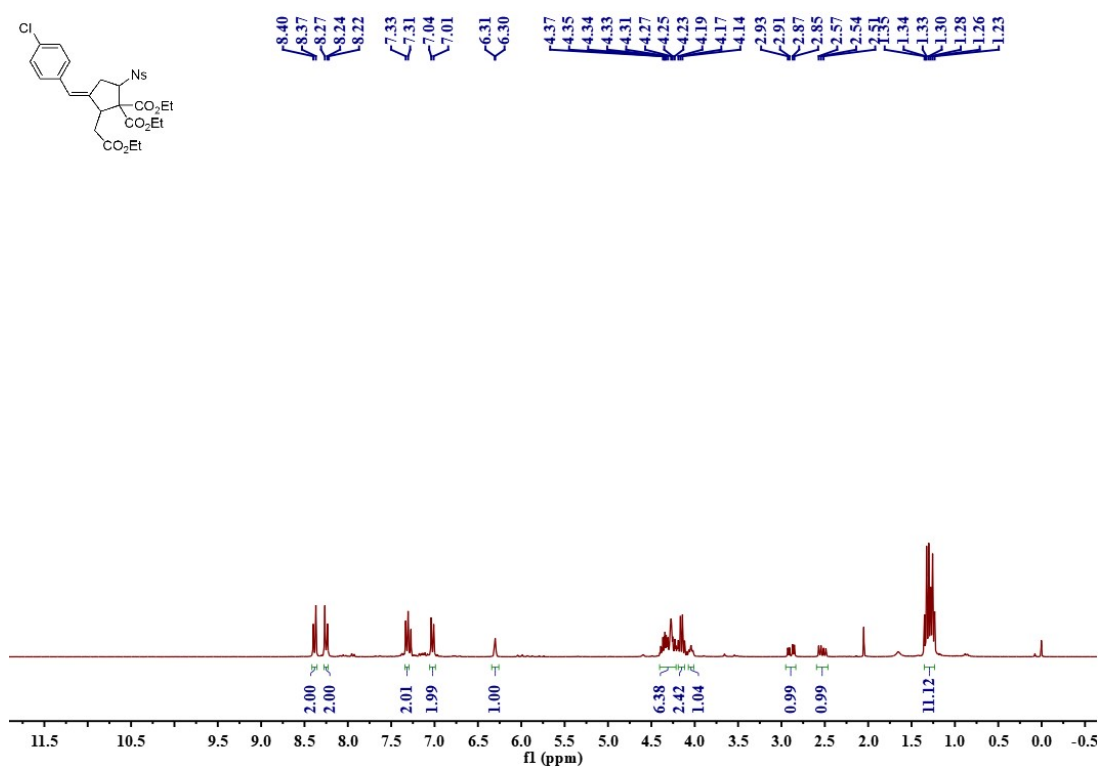

<sup>1</sup>H NMR (CDCl<sub>3</sub>, 300 MHz) NMR of **3ja**

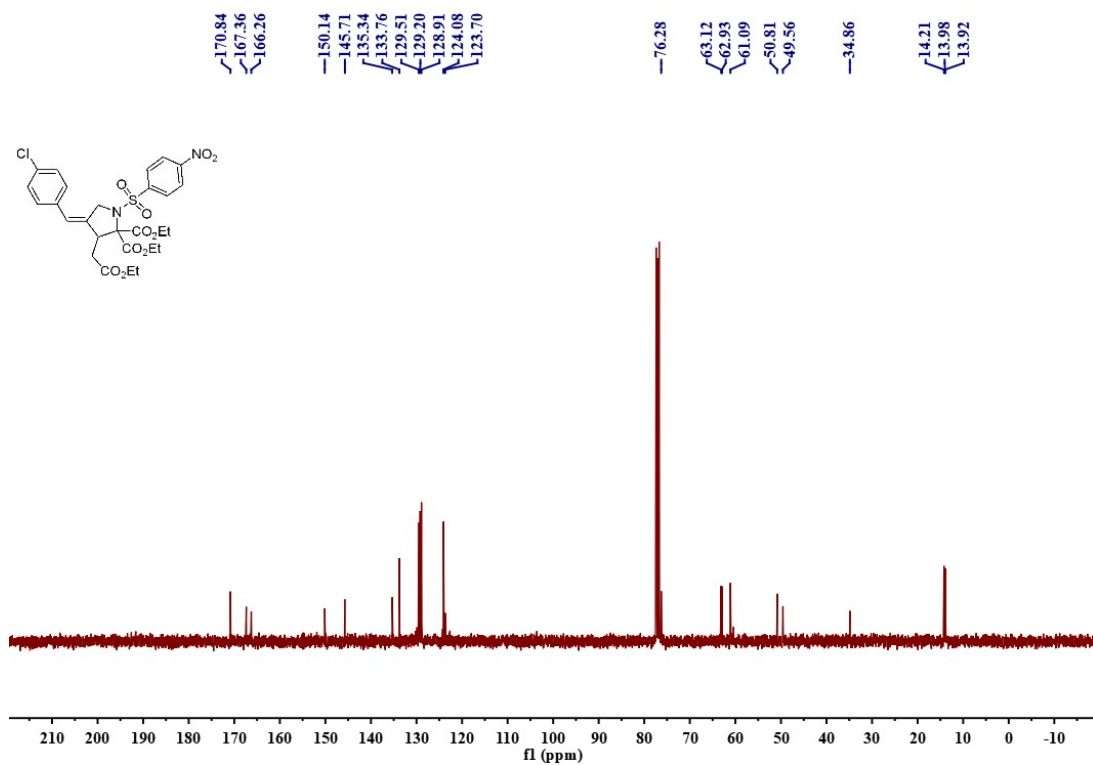

<sup>13</sup>C NMR (CDCl<sub>3</sub>, 101 MHz) NMR of **3ja**

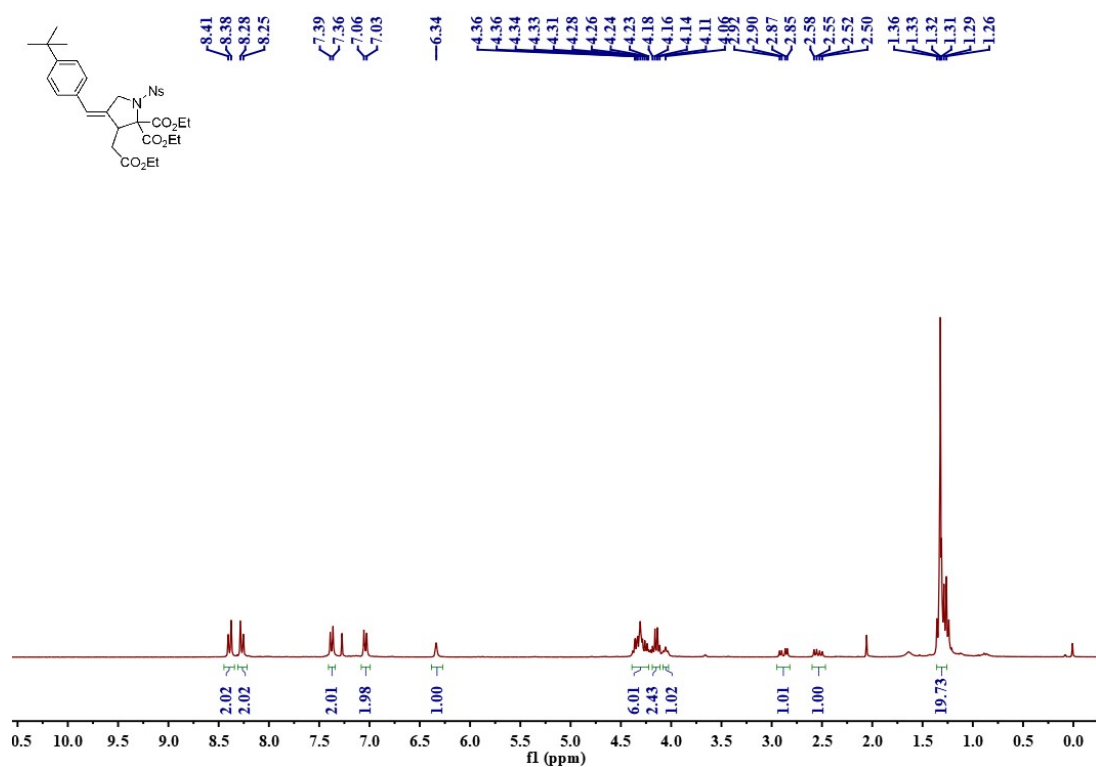

<sup>1</sup>H NMR (CDCl<sub>3</sub>, 300 MHz) NMR of **3ka**

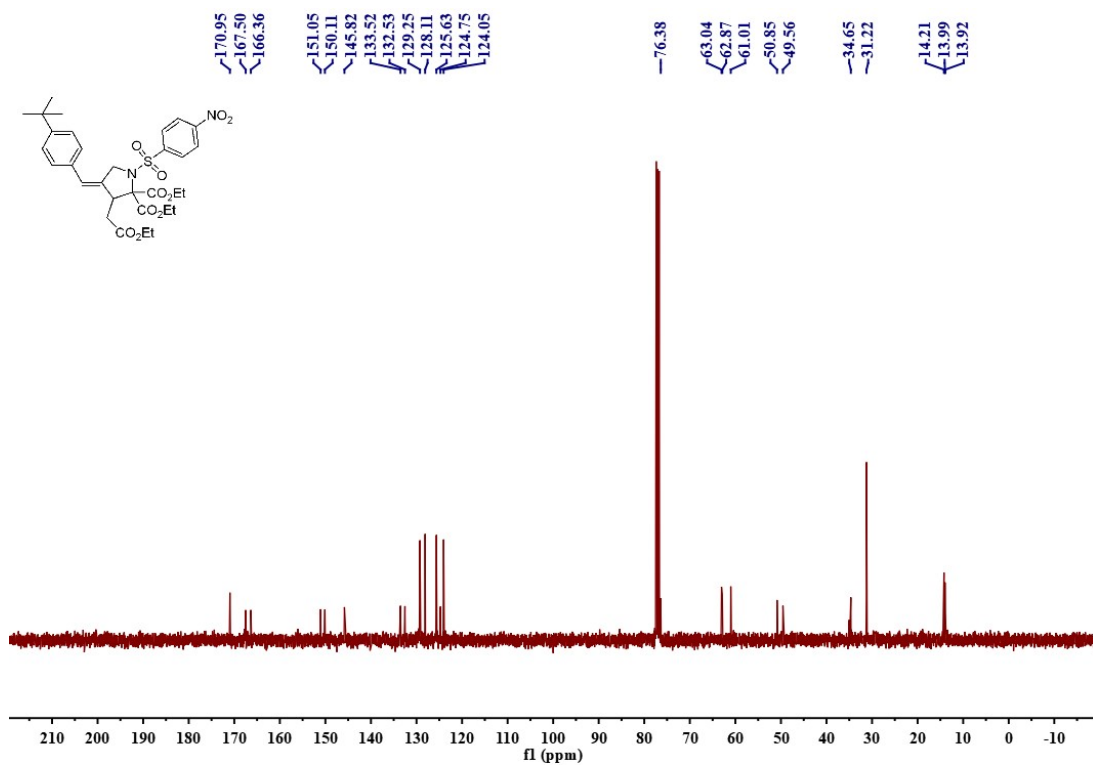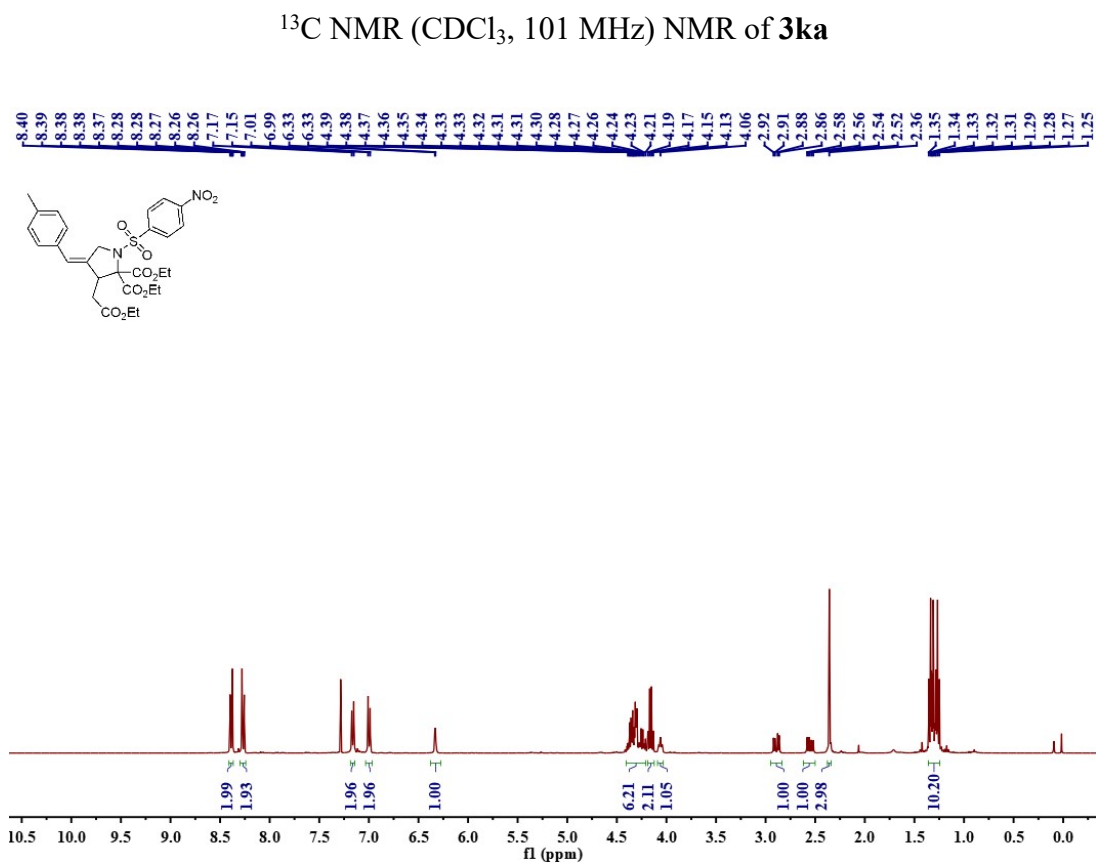

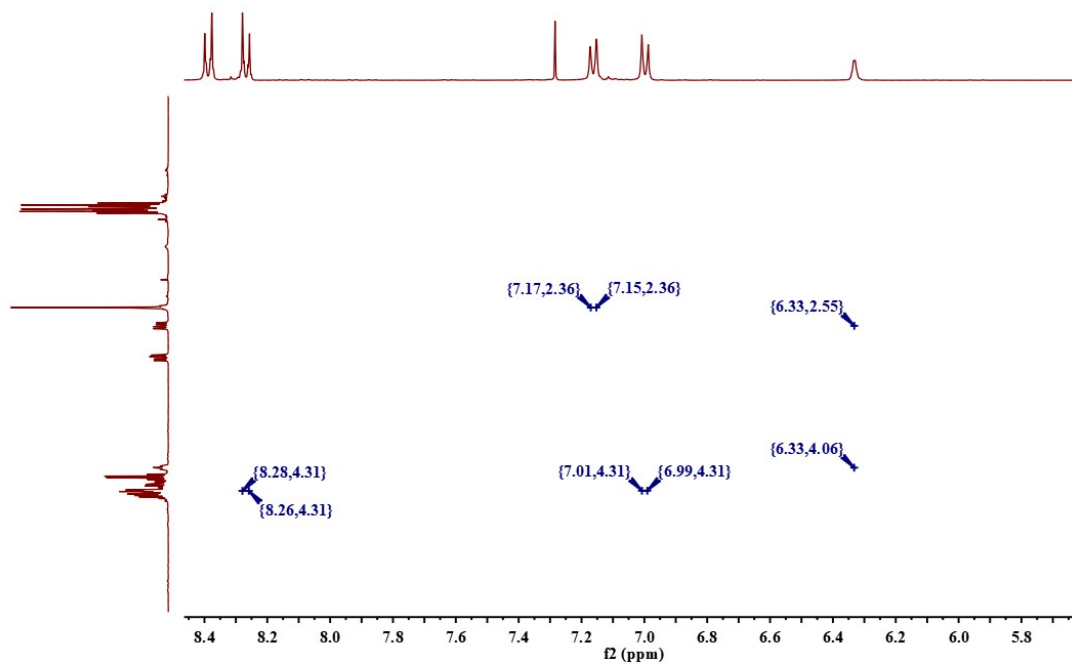

NOESY (CDCl<sub>3</sub>, 400 MHz) of **3a**

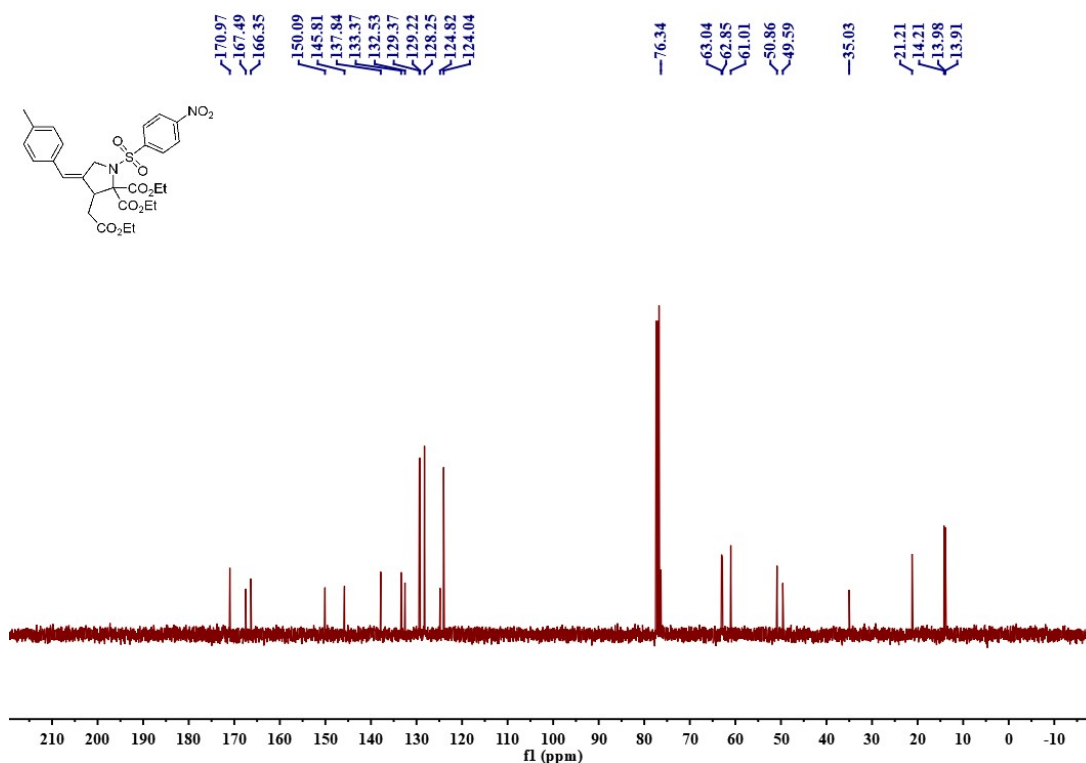

<sup>13</sup>C NMR (CDCl<sub>3</sub>, 101 MHz) NMR of **3a**



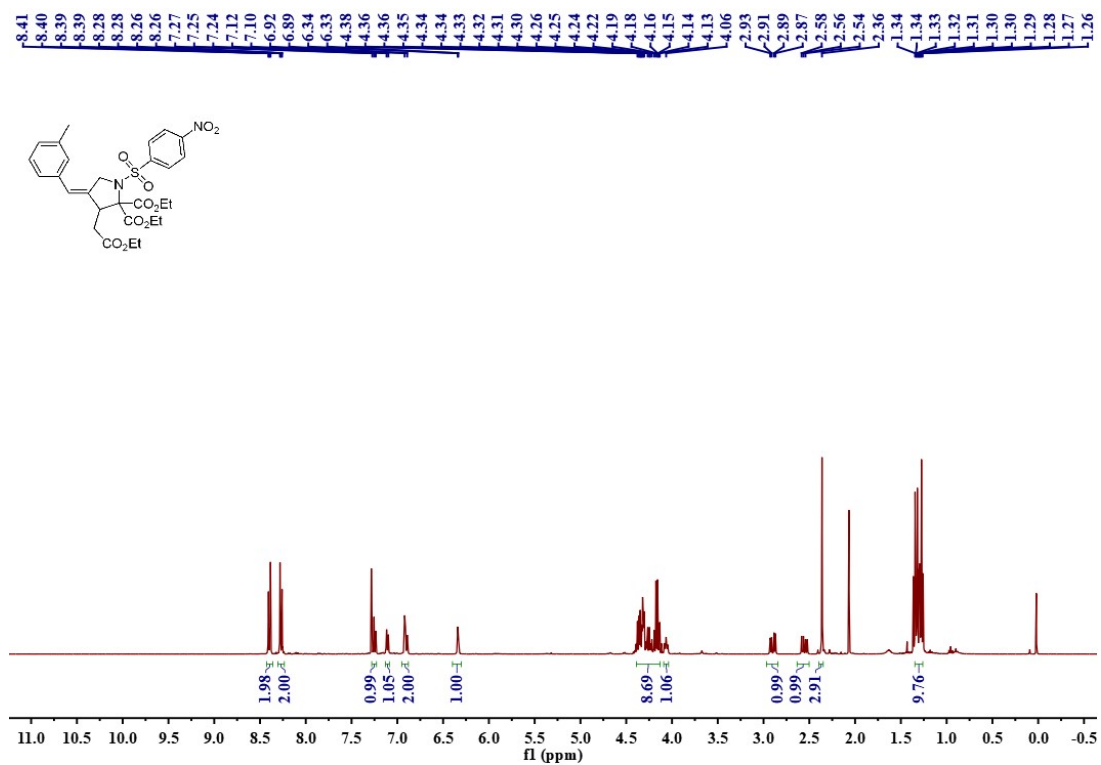

<sup>1</sup>H NMR (CDCl<sub>3</sub>, 400 MHz) NMR of **3ma**

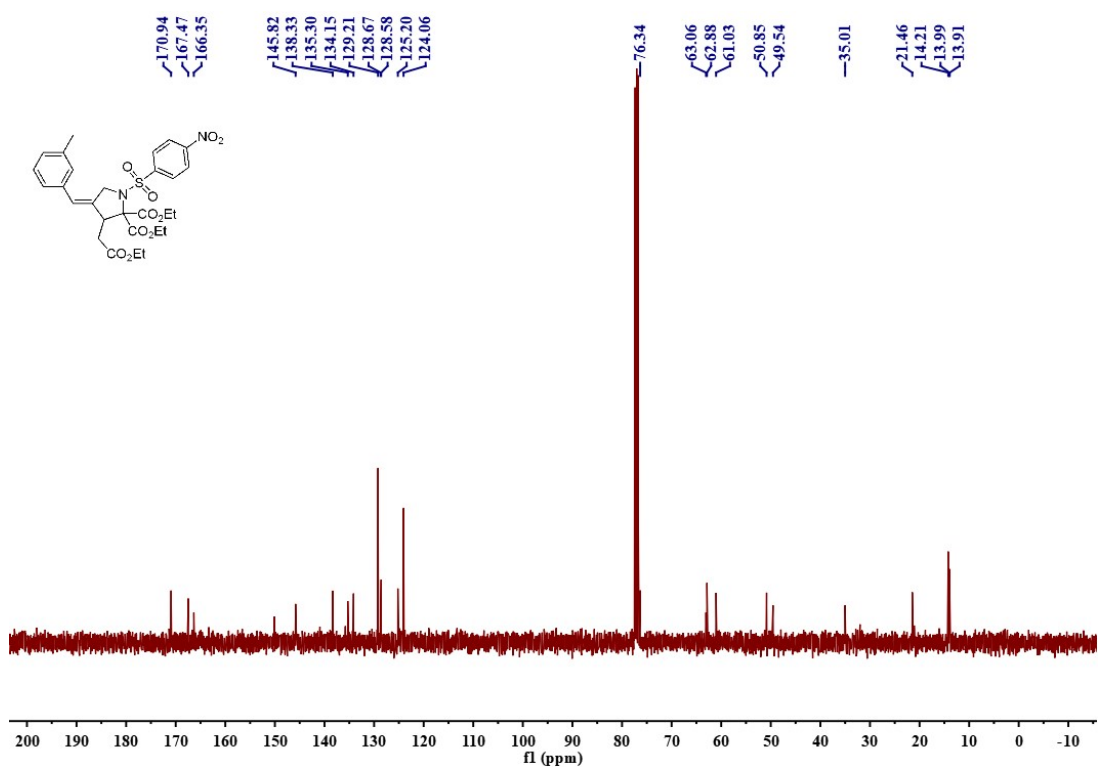

<sup>13</sup>C NMR (CDCl<sub>3</sub>, 101 MHz) NMR of **3ma**

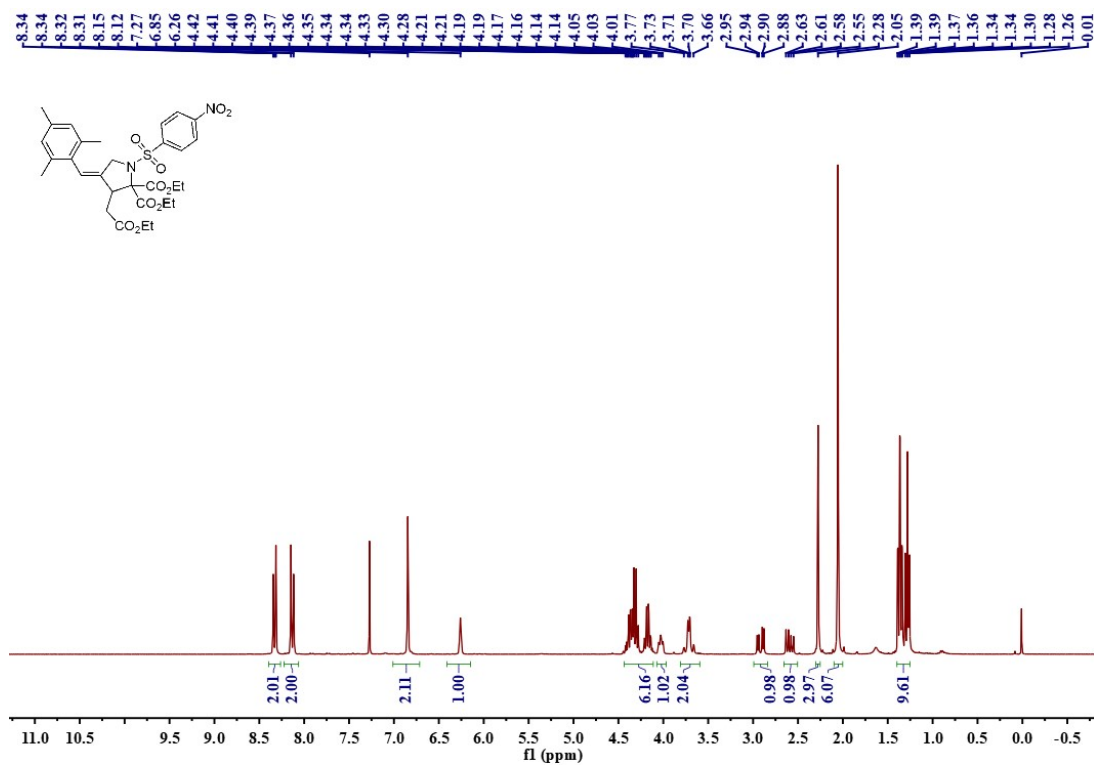

<sup>1</sup>H NMR (CDCl<sub>3</sub>, 300 MHz) NMR of **3na**

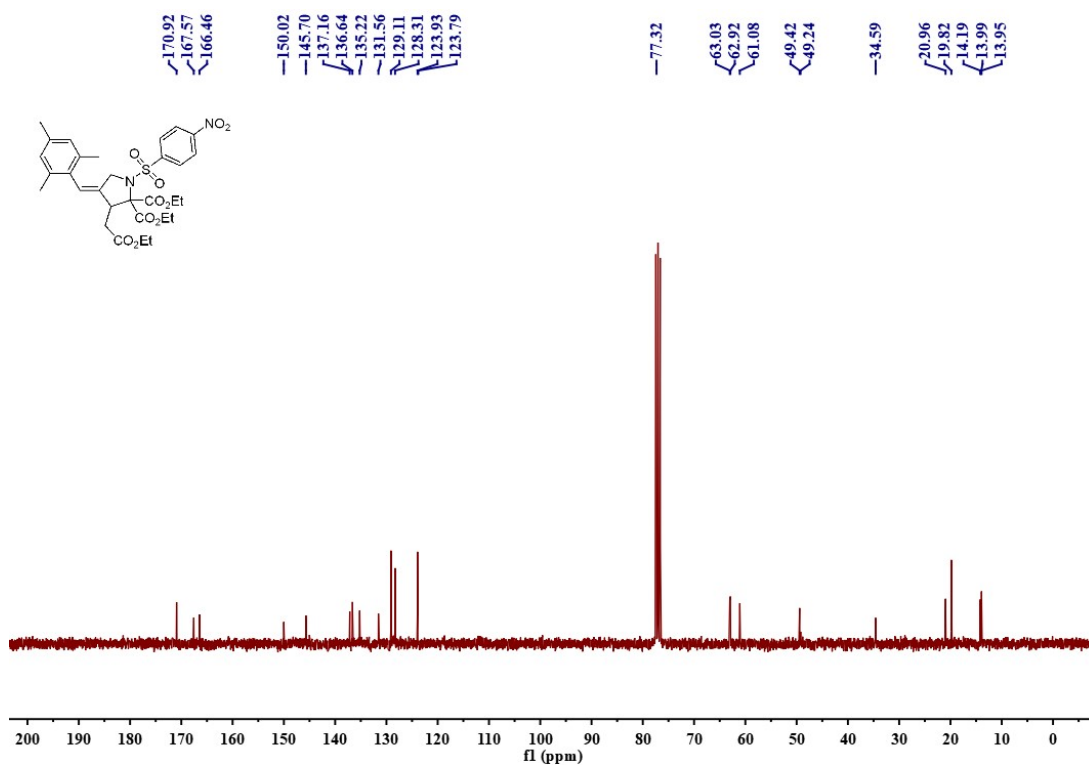

<sup>13</sup>C NMR (CDCl<sub>3</sub>, 75 MHz) NMR of **3na**

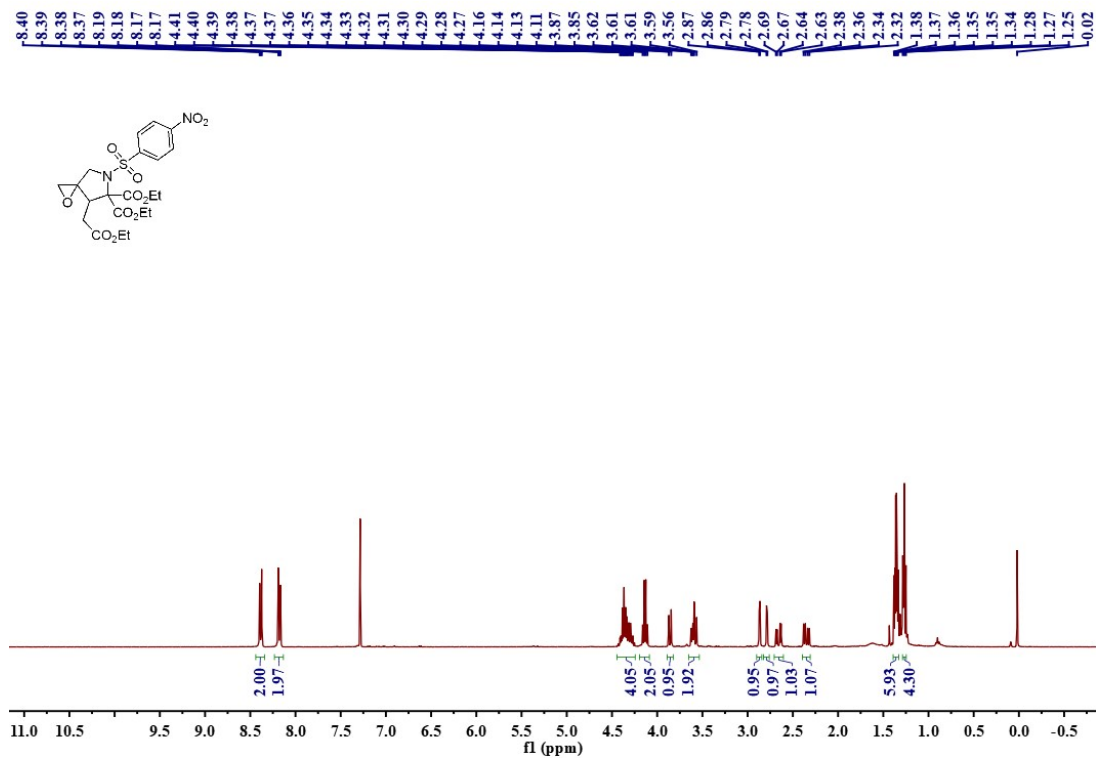

<sup>1</sup>H NMR (CDCl<sub>3</sub>, 400 MHz) NMR of 4

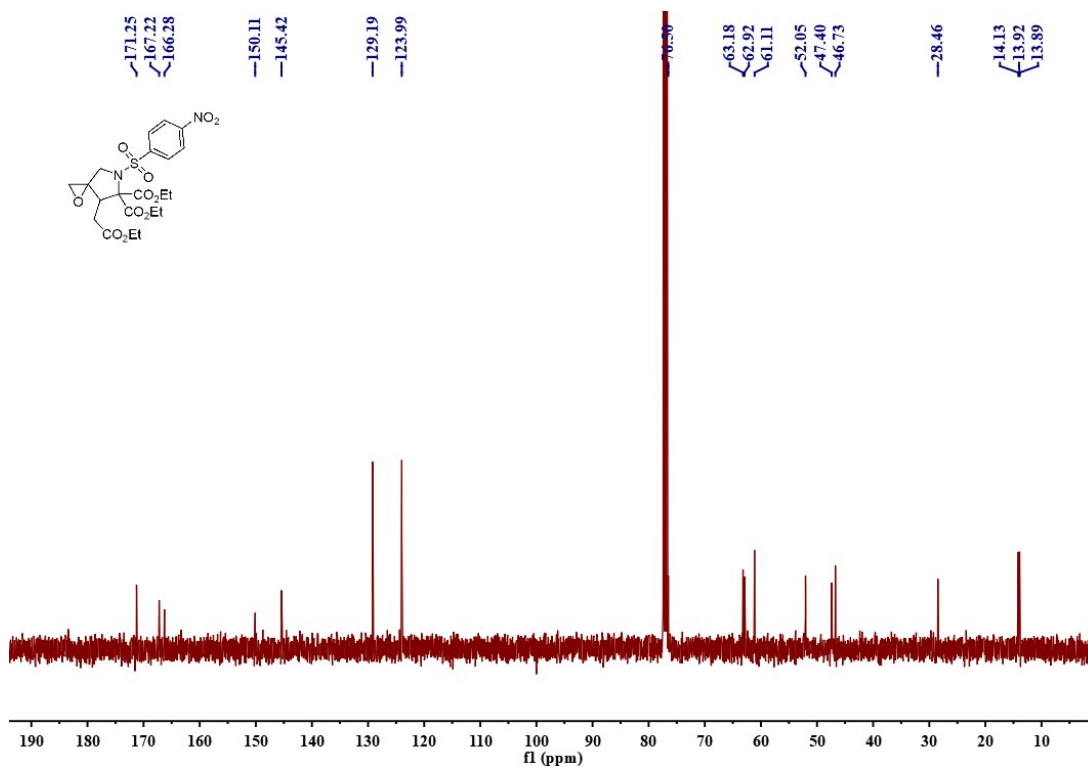

<sup>13</sup>C NMR (CDCl<sub>3</sub>, 101 MHz) NMR of 4

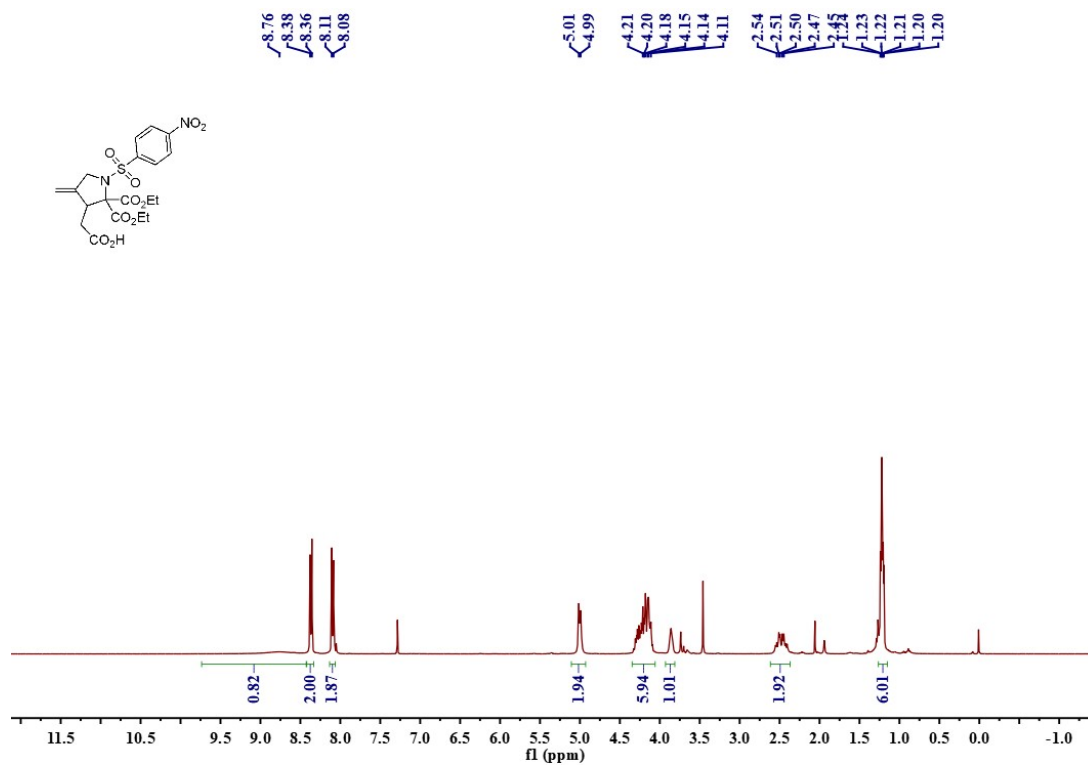

<sup>1</sup>H NMR (CDCl<sub>3</sub>, 400 MHz) NMR of **5**

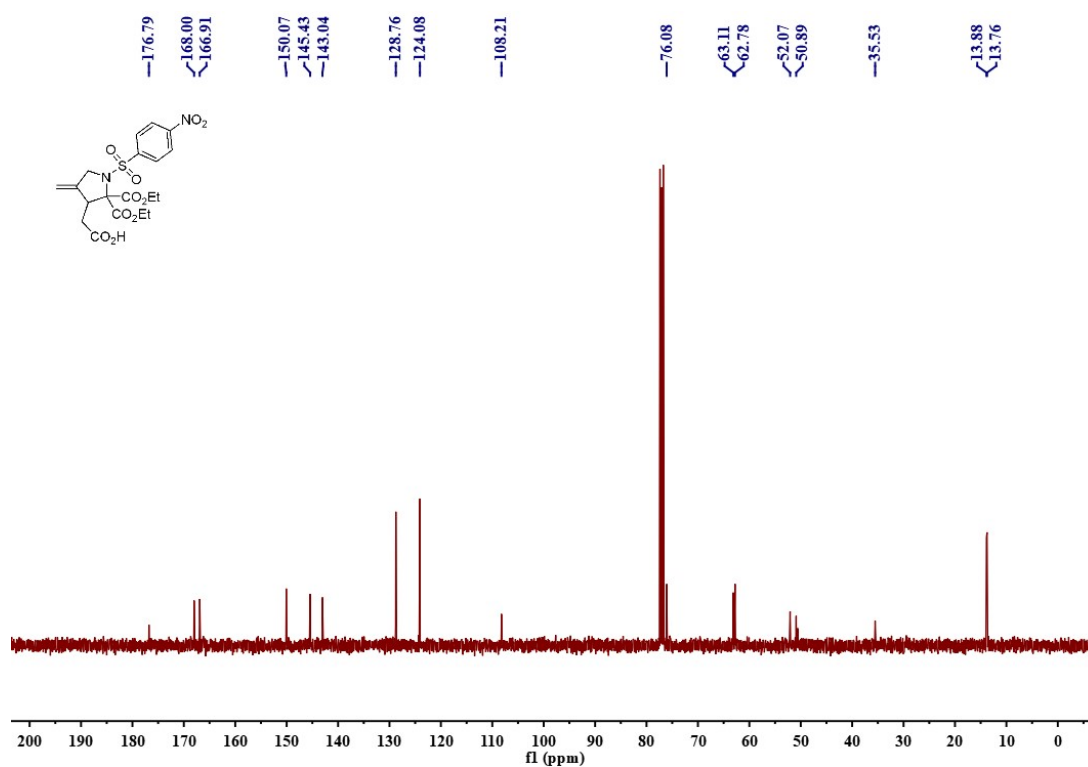

<sup>13</sup>C NMR (CDCl<sub>3</sub>, 101 MHz) NMR of **5**

## 6. Copies of HPLC Chromatograms

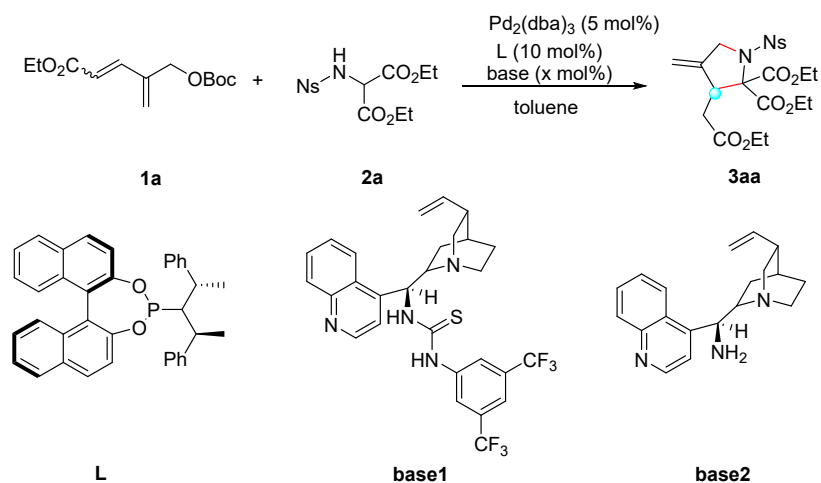

Table S2 Asymmetric [3+2] cyclization

| Entry | 1a               | Cat                         | L        | Base  | equiv | Yields (%) <sup>b</sup> | ee(%) <sup>c</sup> |
|-------|------------------|-----------------------------|----------|-------|-------|-------------------------|--------------------|
| 1     | <i>trans</i> -1a | $\text{Pd}_2(\text{dba})_3$ | L        | base1 | 0.2   | 20                      | Rac <sup>e</sup>   |
| 2     | <i>trans</i> -1a | $\text{Pd}_2(\text{dba})_3$ | L        | base1 | 0.5   | 73                      | 35                 |
| 3     | <i>trans</i> -1a | $\text{Pd}_2(\text{dba})_3$ | L        | base1 | 0.75  | 49                      | 33                 |
| 4     | <i>trans</i> -1a | $\text{Pd}_2(\text{dba})_3$ | L        | base1 | 1     | ND <sup>d</sup>         | -                  |
| 5     | <i>cis</i> -1a   | $\text{Pd}_2(\text{dba})_3$ | xantphos | Base2 | 0.5   | ND <sup>d</sup>         | -                  |

<sup>a</sup> In  $\text{N}_2$  atmosphere, **1a** (0.13 mmol), **2a** (0.1 mmol), [Pd] (5 mol %), and ligand (10 mol %) were performed in solvent (1.0 mL). <sup>b</sup> The yield of the separated products. <sup>c</sup> Chiral HPLC was used for the determination. The HPLC collection parameters were as follows :CHIRALCEL<sup>®</sup>AD-H, wavelength 254 nm, mobile phase :*i*PrOH:Hex=15:85, flow rate :1mL/min. <sup>d</sup> ND = Not detected. <sup>e</sup> Rac = racemic.

**HPLC acquisition parameters:** Chiral column: CHIRALCEL<sup>®</sup>AD-H, Wave length: 254 nm, Mobile phase: *i*PrOH:Hex = **15:85**, Flow rate: 1mL/min

HPLC Spectra of racemic **3aa**\* ( $\text{Pd}(\text{PPh}_3)_4$ )

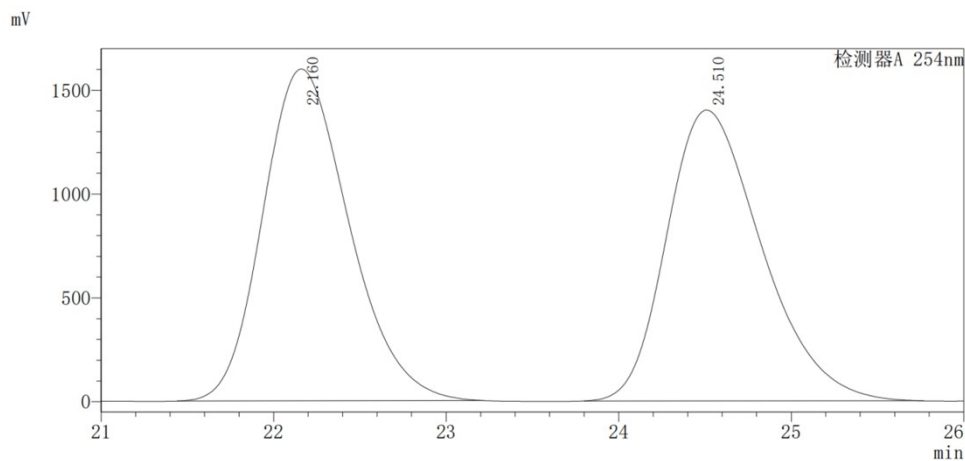

Discloser A 254nm

| Peak  | Retent time(min) | Area(%) |
|-------|------------------|---------|
| 1     | 22.160           | 50.853  |
| 2     | 24.510           | 49.147  |
| total |                  | 100     |

HPLC Spectra of enantiomeric **3aa**\* (Table S2 entry 3)

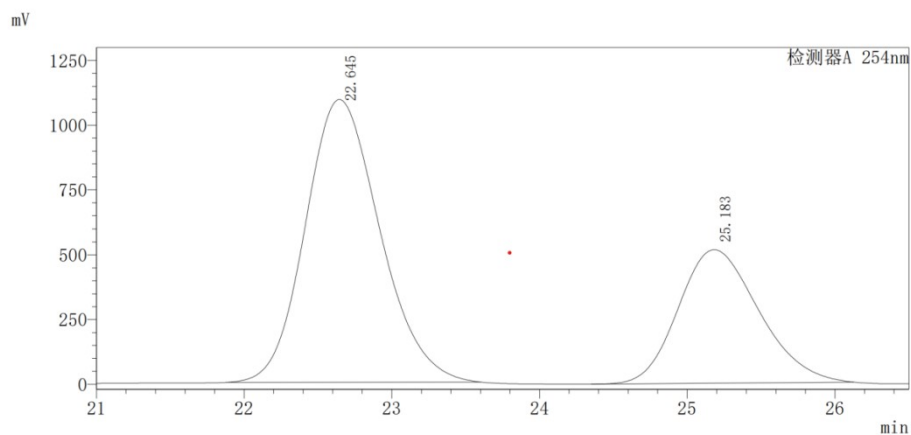

Discloser A 254nm

| Peak  | Retent time(min) | Area(%) |
|-------|------------------|---------|
| 1     | 22.645           | 66.210  |
| 2     | 25.183           | 33.790  |
| total |                  | 100     |

HPLC Spectra of enantiomeric **3aa**\* (Table S2 entry 2)

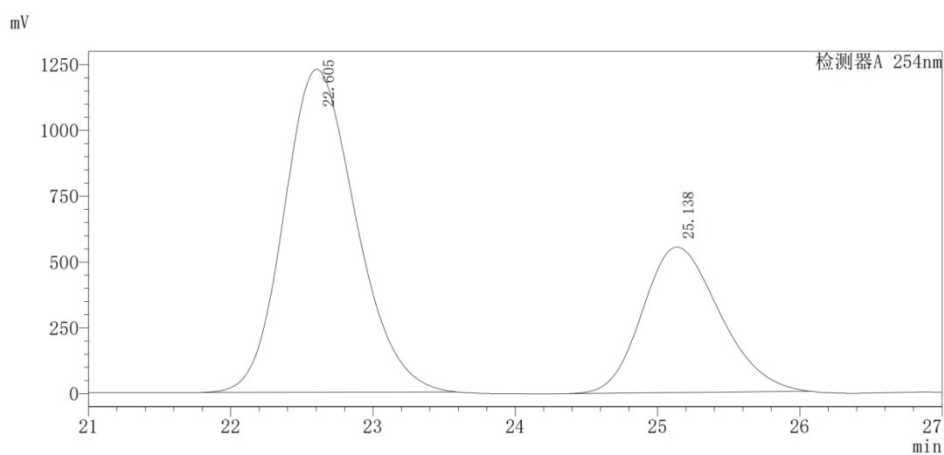

Discloser A 254nm

| Peak  | Retent time(min) | Area(%) |
|-------|------------------|---------|
| 1     | 22.605           | 67.393  |
| 2     | 25.138           | 32.607  |
| total |                  | 100     |

## 7. X-Ray single crystal data of product 3aa

The X-ray crystallographic structures for **3aa**. ORTEP view of the molecules of complex **3aa**, showing ellipsoids at 30% probability level. Crystal data have been deposited to CCDC, number **3aa (2223030)**. A summary of the fundamental crystal and refinement data are given in the Table 1 of the Supporting Information. Atomic coordinates, anisotropic displacement parameters and bond lengths and angles can be found in the cif files. White crystals suitable for X-ray diffraction were grown by n-hexane/Ethyl acetate solution of **3aa** inside a penicillin bottle.

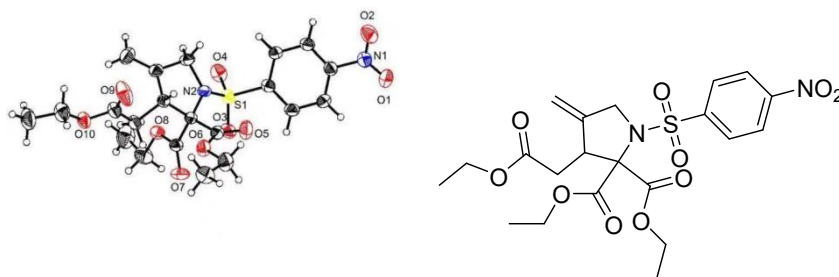

**Crystal structure of 3aa (CCDC 2223030)**

**Table S3 Crystal data and structure refinement for 3aa**

|                     |                                                                  |
|---------------------|------------------------------------------------------------------|
| Identification code | 3aa                                                              |
| Empirical formula   | C <sub>21</sub> H <sub>26</sub> N <sub>2</sub> O <sub>10</sub> S |
| Formula weight      | 498.13                                                           |
| Temperature/K       | 199.99(10)                                                       |
| Crystal system      | monoclinic                                                       |
| Space group         | P2 <sub>1</sub> /n                                               |
| a/Å                 | 10.44620(10)                                                     |
| b/Å                 | 15.6061(2)                                                       |
| c/Å                 | 15.3949(2)                                                       |
| α/°                 | 90                                                               |
| β/°                 | 107.3790(10)                                                     |

---

|                                                |                                                               |
|------------------------------------------------|---------------------------------------------------------------|
| $\gamma/^\circ$                                | 90                                                            |
| Volume/ $\text{\AA}^3$                         | 2395.17(5)                                                    |
| Z                                              | 34                                                            |
| $\rho_{\text{calc}}/\text{cm}^3$               | 1.770                                                         |
| $\mu/\text{mm}^{-1}$                           | 7.861                                                         |
| F(000)                                         | 1292.0                                                        |
| Crystal size/ $\text{mm}^3$                    | $0.2 \times 0.2 \times 0.2$                                   |
| Radiation                                      | CuK $\alpha$ ( $\lambda = 1.54184$ )                          |
| 2 $\Theta$ range for data collection/ $^\circ$ | 9.112 to 147.586                                              |
| Index ranges                                   | $-12 \leq h \leq 12, -19 \leq k \leq 18, -15 \leq l \leq 18$  |
| Reflections collected                          | 14317                                                         |
| Independent reflections                        | 4724 [ $R_{\text{int}} = 0.0333, R_{\text{sigma}} = 0.0337$ ] |
| Data/restraints/parameters                     | 4724/6/310                                                    |
| Goodness-of-fit on $F^2$                       | 1.053                                                         |
| Final R indexes [ $I \geq 2\sigma(I)$ ]        | $R_1 = 0.0397, wR_2 = 0.1052$                                 |
| Final R indexes [all data]                     | $R_1 = 0.0447, wR_2 = 0.1089$                                 |
| Largest diff. peak/hole / $e \text{\AA}^{-3}$  | 0.24/-0.49                                                    |
